# Supplementary material for: Chemodivergent phosphonylation of diazocarboxylates: light-on vs. light-off reactions
Source: Royal Society of Chemistry journal article supplement (doi:10.1039/d4ob00573b), 2024-01-01
Supplement: d4ob00573b1.pdf [file d4ob00573b1.pdf]

Supporting Information  
For

## Chemodivergent Phosphonylation of Diazocarboxylates: Light-On Vs Light-Off Reaction

Jalaj Kumar Pathak,<sup>a, b</sup> Ruchir Kant,<sup>c</sup> and Namrata Rastogi\*,<sup>a, b</sup>

<sup>a</sup>Medicinal & Process Chemistry Division and <sup>c</sup>Biochemistry & Structural Biology Division, CSIR-Central Drug Research Institute, Lucknow 226031, India

<sup>b</sup>Academy of Scientific and Innovative Research, Ghaziabad 201002, India

*namrataiit@gmail.com; namrata.rastogi@cdri.res.in*

### Table of Contents

|                                                                                                                                  |       |
|----------------------------------------------------------------------------------------------------------------------------------|-------|
| General Information.....                                                                                                         | 2     |
| Instrumentation Details.....                                                                                                     | 3     |
| General Procedures.....                                                                                                          | 3     |
| Details of X-ray Analysis of <b>3k</b> .....                                                                                     | 4-5   |
| Characterization Data .....                                                                                                      | 5-15  |
| References.....                                                                                                                  | 15    |
| Copies of <sup>1</sup> H, <sup>13</sup> C{H}, <sup>31</sup> P{H}, <sup>19</sup> F{H} NMR Spectra & ESMS of crude <b>4a</b> ..... | 16-68 |

## 1. General Information

Unless mentioned otherwise, all reactions were carried out under nitrogen atmosphere in flame-dried glassware. All reactions were monitored by TLC, visualization was effected with UV and/or by developing in iodine. The NMR Chemical shifts are reported in  $\delta$  (ppm) relative to TMS as the internal standard for  $^1\text{H}$  and  $^{13}\text{C}\{\text{H}\}$ , TFA as the internal standard for  $^{19}\text{F}\{\text{H}\}$  and phosphoric acid as the external standard for  $^{31}\text{P}\{\text{H}\}$ . To describe spin multiplicity, standard abbreviations such as s, d, t, q, m, dd referring to singlet, doublet, triplet, quartet, multiplet and doublet of doublet respectively, are used.

The aryldiazoacetates (**1a-1q**)<sup>1</sup> as well as other diazo substrates (**1r-1u**)<sup>2-4</sup> were synthesized following reported literature protocols. All the trialkyl phosphites (**2a-2d**) were commercially available. All other chemicals and catalysts were purchased from commercial sources and used as received. The structure of substrates **1a-1u** and **2a-2d** have been provided in Table S1 and S2, respectively.

**Table S1.** Substitutions in diazo substrates **1**

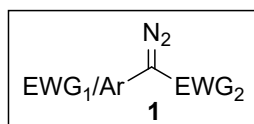

| Compound  | Ar/EWG <sub>1</sub>    | EWG <sub>2</sub>   | Compound  | Ar/EWG <sub>1</sub>         | EWG <sub>2</sub>          |
|-----------|------------------------|--------------------|-----------|-----------------------------|---------------------------|
| <b>1a</b> | Ph                     | CO <sub>2</sub> Me | <b>1l</b> | 2-NO <sub>2</sub> -Ph       | CO <sub>2</sub> Me        |
| <b>1b</b> | 2-OMe-Ph               | -do-               | <b>1m</b> | 1-naphthyl                  | -do-                      |
| <b>1c</b> | 4-OMe-Ph               | -do-               | <b>1n</b> | 3,4-(OCH <sub>2</sub> O)-Ph | CO <sub>2</sub> Et        |
| <b>1d</b> | 4-OCF <sub>3</sub> -Ph | -do-               | <b>1o</b> | 3-thienyl                   | -do-                      |
| <b>1e</b> | 4-Ph-Ph                | -do-               | <b>1p</b> | Ph                          | CO <sub>2</sub> allyl     |
| <b>1f</b> | 4-Cl-Ph                | -do-               | <b>1q</b> | Ph                          | CO <sub>2</sub> propargyl |
| <b>1g</b> | 4-Br-Ph                | -do-               | <b>1r</b> | Ph                          | COPh                      |
| <b>1h</b> | 4-F-Ph                 | -do-               | <b>1s</b> | Ph                          | CF <sub>3</sub>           |
| <b>1i</b> | 3-CF <sub>3</sub> -Ph  | -do-               | <b>1t</b> | CO <sub>2</sub> Et          | CO <sub>2</sub> Et        |
| <b>1j</b> | 4-CF <sub>3</sub> -Ph  | -do-               | <b>1u</b> | COPh                        | COPh                      |
| <b>1k</b> | 2-NO <sub>2</sub> -Ph  | -do-               |           |                             |                           |

**Table S2.** Substitutions in alkyl phosphites **2**

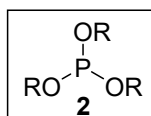

| Compound  | R  | Compound  | R                |
|-----------|----|-----------|------------------|
| <b>2a</b> | Me | <b>2c</b> | <i>i</i> -propyl |
| <b>2b</b> | Et | <b>2d</b> | allyl            |

## 2. Instrumentation Details

Melting points were recorded on a Precision melting point apparatus and are uncorrected. NMR spectra were recorded on a Bruker Avance spectrometer at 400/500 MHz ( $^1\text{H}$ ), 100/125 MHz ( $^{13}\text{C}\{\text{H}\}$ ), 162 MHz ( $^{31}\text{P}\{\text{H}\}$ ) and 376 MHz ( $^{19}\text{F}\{\text{H}\}$ ). The ESI-HRMS spectra were recorded on Agilent 6520-Q-ToF LC/MS system. The reactions were irradiated using high power blue LEDs (make: Original Oplunt America, power = 3 W,  $\lambda_{\text{max}} = 455$  nm, luminous flux/radiant flux = 687 mW at 700 mA) fitted in an aluminum block. The block contains 6 holes to hold vials and water inlet-outlet nozzles. The vials placed in holes on the block were irradiated from bottom at a distance of  $\approx 2$  cm. The reaction temperature can be maintained by circulating water through the aluminum block via inlet-outlet nozzles (Figure S1).

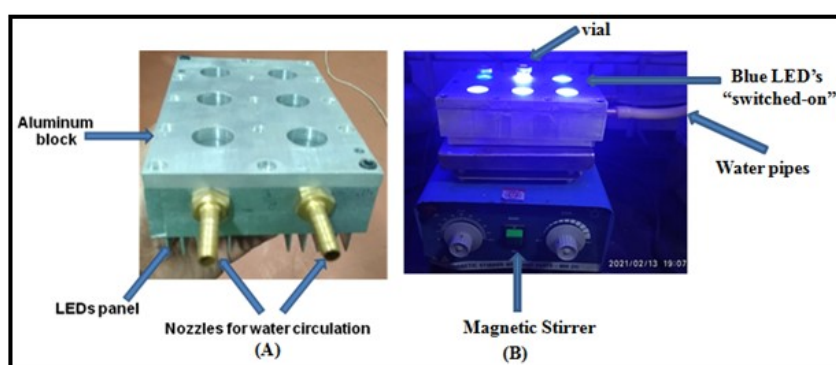

Figure S1. (A) Picture of the visible light photoreactor; (B) Experimental set-up

## 3. General Procedures

### 3.1. General procedure for thermal phosphorylation

In an oven dried 5 mL snap vial equipped with a magnetic stir bar, diazo compound **1** (0.2 mmol) and trialkyl phosphite **2** (0.6 mmol) were dissolved in anhydrous acetonitrile (2.0 mL). The solution was purged with nitrogen and stirred at room temperature (25-30 °C) for 12 h. Upon completion of the reaction (TLC monitoring), the reaction mixture was concentrated under reduced pressure. The crude product was purified by column chromatography on silica gel (100-200 mesh) with hexane/ethyl acetate as eluent, furnishing the pure product **3**.

### 3.2. General procedure for photocatalytic phosphorylation

In an oven dried 5 mL snap vial equipped with a magnetic stir bar, diazo compound **1** (0.4 mmol) and trialkyl phosphite (0.2 mmol) were dissolved in dichloromethane (2.0 mL). The resulting reaction mixture was degassed by three “pump-freeze-thaw” cycles via a syringe needle and stirred at room temperature (25-30 °C) under the irradiation of 455 nm, 3W blue LEDs for 6 h. Upon completion of the reaction (TLC monitoring), the reaction mixture was concentrated under reduced pressure. The crude product was purified by column chromatography on silica gel (100-200 mesh) with hexane/ethyl acetate as eluent, furnishing the pure product **4**.

#### 4. Details of X-ray Analysis of 3k

A good quality single crystal of size 0.39 x 0.15 x 0.15 mm, was selected under a polarizing microscope and mounted on a glass fiber for data collection. Single crystal X-ray data for compound **3k** were collected on the Rigaku XtaLAB Synergy-S single crystal X-ray diffractometer equipped with a HyPix-6000HE Hybrid Photon Counting (HPC) detector, dual Mo and Cu microfocus sealed X-ray source with kappa goniometer at 294 (2) K. Data collection cell determination, and data reduction was performed using the CrysAlisPro<sup>5</sup> software. Structure solution and refinement were performed by using SHELX-97.<sup>6</sup> Refinement of coordinates and anisotropic thermal parameters of non-hydrogen atoms were carried out by the full-matrix least-squares method. The hydrogen atoms attached to carbons were generated with idealized geometries and isotropically refined using a riding model.

**Crystallization:** Crystals of compound **3k** were grown from the solvent chloroform by slow evaporation method (Figure S2, Table S3).

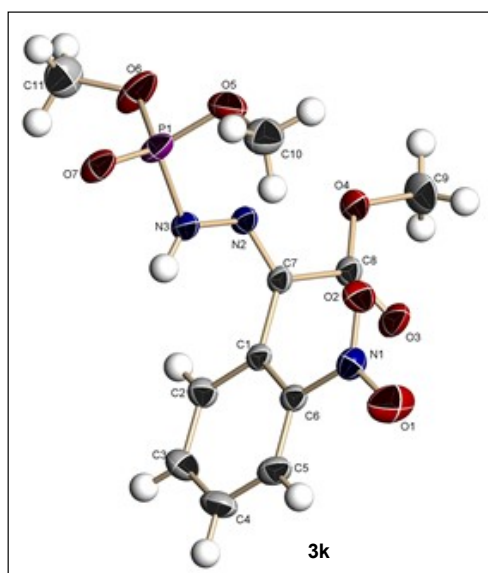

**Figure S2.** ORTEP diagram drawn with 30% ellipsoid probability for non-H atoms of the crystal structure of compound **3k** determined at 294K.

**Table S3.** Crystal data and structure refinement details for compound **3k**

| Compound          | <b>3k</b>                                                       |
|-------------------|-----------------------------------------------------------------|
| Empirical formula | C <sub>11</sub> H <sub>14</sub> N <sub>3</sub> O <sub>7</sub> P |
| Formula weight    | 331.22                                                          |
| Crystal System    | Monoclinic                                                      |
| Space group       | P 2 <sub>1</sub> /c                                             |
| <i>a</i> (Å)      | 9.6313(2)                                                       |
| <i>b</i> (Å)      | 8.3277(2)                                                       |
| <i>c</i> (Å)      | 18.8433(3)                                                      |

|                                  |            |
|----------------------------------|------------|
| $\alpha$ (°)                     | 90.00      |
| $\beta$ (°)                      | 95.670(2)  |
| $\gamma$ (°)                     | 90.00      |
| $V$ (Å <sup>3</sup> )            | 1503.96(5) |
| $Z$                              | 4          |
| $D_c$ (g/cm <sup>3</sup> )       | 1.463      |
| $F_{000}$                        | 688        |
| $\mu$ (mm <sup>-1</sup> )        | 2.001      |
| $\theta_{\max}$ (°)              | 77.58      |
| Total reflections                | 10723      |
| Unique reflections               | 3050       |
| Reflections [ $I > 2\sigma(I)$ ] | 2716       |
| Parameters                       | 203        |
| $R_{\text{int}}$                 | 0.0372     |
| Goodness-of-fit                  | 1.065      |
| $R$ [ $F^2 > 2\sigma(F^2)$ ]     | 0.0649     |
| $wR$ ( $F^2$ , all data)         | 0.1805     |
| CCDC No.                         | 2342436    |

## 5. Characterization Data

### Methyl (*E*)-2-(2-(dimethoxyphosphoryl)hydrazineylidene)-2-phenylacetate (**3a**)<sup>7</sup>

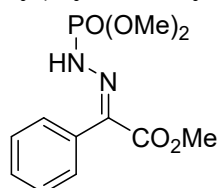

White solid; isolated yield 78% (45 mg).  $R_f$  0.50 (50% EtOAc/hexane); Mp 93-95 °C; <sup>1</sup>H NMR (400 MHz, CDCl<sub>3</sub>)  $\delta$  7.49-7.54 (m, 3H), 7.26 (d,  $J = 7.8$  Hz, 2H merged with solvent peak), 7.08 (d,  $^2J_{\text{H-P}} = 30.5$  Hz, 1H), 3.87 (d,  $^3J_{\text{H-P}} = 12.2$  Hz, 6H merged with s at 3.84), 3.84 (s, 3H merged with d at 3.87); <sup>13</sup>C{<sup>1</sup>H} NMR (100 MHz, CDCl<sub>3</sub>)  $\delta$  163.95, 143.66 (d,  $^3J_{\text{C-P}} = 16.9$  Hz), 130.39, 129.70, 128.40, 128.29, 54.42 (d,  $^2J_{\text{C-P}} = 5.9$  Hz), 52.77; <sup>31</sup>P{<sup>1</sup>H} NMR (162 MHz, CDCl<sub>3</sub>)  $\delta$  1.62; HRMS for C<sub>11</sub>H<sub>16</sub>N<sub>2</sub>O<sub>5</sub>P<sup>+</sup>: calcd. [M+H]<sup>+</sup>: 287.0791, found: 287.0792

### Methyl (*E*)-2-(2-(dimethoxyphosphoryl)hydrazineylidene)-2-(2-methoxyphenyl)acetate (**3b**)

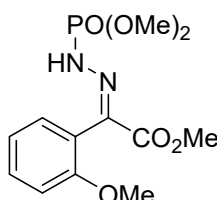

White solid; isolated yield 76% (51 mg).  $R_f$  0.50 (60% EtOAc/hexane); Mp 144-145 °C; <sup>1</sup>H NMR (400 MHz, CDCl<sub>3</sub>)  $\delta$  7.44-7.48 (m, 1H), 7.13 (dd,  $J = 7.4$  Hz, 1.5 Hz, 1H), 7.07 (t,  $J = 7.3$  Hz, 1H), 7.01 (d,  $J = 8.4$  Hz, 1H), 6.91 (d,  $^2J_{\text{H-P}} = 30.5$  Hz, 1H), 3.85 (d,  $^3J_{\text{H-P}} = 11.4$  Hz, 6H), 3.82 (s, 3H), 3.80 (s, 3H); <sup>13</sup>C{<sup>1</sup>H} NMR (100 MHz, CDCl<sub>3</sub>)  $\delta$  164.06, 156.70, 141.61

(d,  $^3J_{C-P} = 17.4$  Hz), 132.08, 129.84, 121.46, 117.08, 111.78, 55.64, 54.28 (d,  $^2J_{C-P} = 5.8$  Hz), 52.63;  $^{31}\text{P}\{\text{H}\}$  NMR (162 MHz,  $\text{CDCl}_3$ )  $\delta$  1.81; HRMS for  $\text{C}_{12}\text{H}_{17}\text{N}_2\text{O}_6\text{PNa}^+$ : calcd.  $[\text{M}+\text{Na}]^+$ : 339.0722, found: 339.0718

**Methyl (E)-2-(2-(dimethoxyphosphoryl)hydrazineylidene)-2-(4-methoxyphenyl)acetate (3c)**<sup>7</sup>

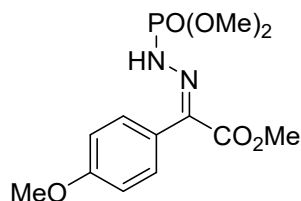

White solid; isolated yield 70% (47 mg).  $R_f$  0.50 (60% EtOAc/hexane); Mp 158-160 °C;  $^1\text{H}$  NMR (400 MHz,  $\text{CDCl}_3$ )  $\delta$  7.18-7.22 (m, 2H), 7.13 (d,  $^2J_{H-P} = 30.4$  Hz, 1H), 7.01-7.04 (m, 2H), 3.86 (s, 3H), 3.85 (d,  $^3J_{H-P} = 11.4$  Hz, 6H), 3.83 (s, 3H);  $^{13}\text{C}\{\text{H}\}$  NMR (100 MHz,  $\text{CDCl}_3$ )  $\delta$  164.21, 160.95, 143.57 (d,  $^3J_{C-P} = 17.2$  Hz), 129.88, 120.11, 115.15, 55.43, 54.39 (d,  $^2J_{C-P} = 5.9$  Hz), 52.74;  $^{31}\text{P}\{\text{H}\}$  NMR (162 MHz,  $\text{CDCl}_3$ )  $\delta$  1.82; HRMS for  $\text{C}_{12}\text{H}_{17}\text{N}_2\text{O}_6\text{PNa}^+$ : calcd.  $[\text{M}+\text{Na}]^+$ : 339.0722, found: 339.0719

**Methyl (E)-2-(2-(dimethoxyphosphoryl)hydrazineylidene)-2-(4-(trifluoromethoxy)phenyl)acetate (3d)**

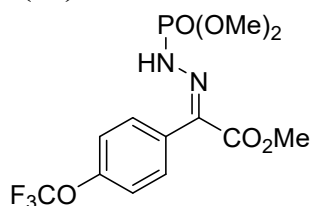

White solid; isolated yield 69% (51 mg).  $R_f$  0.50 (40% EtOAc/hexane); Mp 135-137 °C;  $^1\text{H}$  NMR (400 MHz,  $\text{CDCl}_3$ )  $\delta$  7.38 (d,  $J = 8.2$  Hz, 2H), 7.31-7.33 (m, 2H), 7.05 (d,  $^2J_{H-P} = 30.1$  Hz, 1H), 3.86 (d,  $^3J_{H-P} = 11.5$  Hz, 6H), 3.85 (s, 3H);  $^{13}\text{C}\{\text{H}\}$  NMR (100 MHz,  $\text{CDCl}_3$ )  $\delta$  163.71, 150.43, 142.03 (d,  $^3J_{C-P} = 16.8$  Hz), 130.38, 126.81, 122.00, 120.34 (q,  $^1J_{C-F} = 257.2$  Hz), 54.51 (d,  $^2J_{C-P} = 5.9$  Hz), 52.87;  $^{31}\text{P}\{\text{H}\}$  NMR (162 MHz,  $\text{CDCl}_3$ )  $\delta$  1.27;  $^{19}\text{F}\{\text{H}\}$  NMR (376 MHz,  $\text{CDCl}_3$ )  $\delta$  -57.70; HRMS for  $\text{C}_{12}\text{H}_{15}\text{F}_3\text{N}_2\text{O}_6\text{P}^+$ : calcd.  $[\text{M}+\text{H}]^+$ : 371.0614, found: 371.0619

**Methyl (E)-2-([1,1'-biphenyl]-4-yl)-2-(2-(dimethoxyphosphoryl)hydrazineylidene)acetate (3e)**

**(E)-2-([1,1'-biphenyl]-4-yl)-2-(2-**

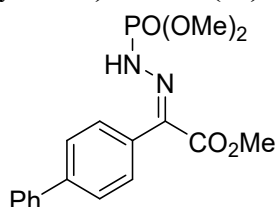

White solid; isolated yield 65% (47 mg).  $R_f$  0.50 (50% EtOAc/hexane); Mp 133-134 °C;  $^1\text{H}$  NMR (400 MHz,  $\text{CDCl}_3$ )  $\delta$  7.72 (d,  $J = 8.2$  Hz, 2H), 7.60 (d,  $J = 7.2$  Hz, 2H), 7.48 (t,  $J = 7.5$  Hz, 2H), 7.41 (t,  $J = 7.3$  Hz, 1H), 7.34 (d,  $J = 8.2$  Hz, 2H), 7.16 (d,  $^2J_{H-P} = 30.4$  Hz, 1H), 3.87 (d,  $^3J_{H-P} = 11.4$  Hz, 6H), 3.86 (s, 3H);  $^{13}\text{C}\{\text{H}\}$  NMR (100 MHz,  $\text{CDCl}_3$ )  $\delta$  164.02, 143.44, 143.43 (d,  $^3J_{C-P} = 16.9$  Hz), 140.03, 128.98, 128.79, 128.46, 128.04, 127.26, 127.03, 54.46 (d,

$^2J_{C-P} = 5.9$  Hz), 52.83;  $^{31}P\{H\}$  NMR (162 MHz,  $CDCl_3$ )  $\delta$  1.64; HRMS for  $C_{17}H_{20}N_2O_5P^+$ : calcd.  $[M+H]^+$ : 363.1104, found: 363.1109

**Methyl (E)-2-(4-chlorophenyl)-2-(2-(dimethoxyphosphoryl)hydrazineylidene)acetate (3f)**<sup>7</sup>

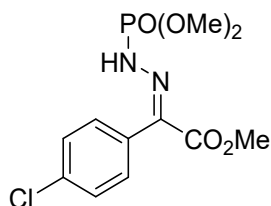

White solid; isolated yield 75% (51 mg).  $R_f$  0.50 (50% EtOAc/hexane); Mp 160-161 °C;  $^1H$  NMR (400 MHz,  $CDCl_3$ )  $\delta$  7.50-7.52 (m, 2H), 7.20-7.22 (m, 2H), 7.03 (d,  $^2J_{H-P} = 30.1$  Hz, 1H), 3.86 (d,  $^3J_{H-P} = 11.4$  Hz, 6H), 3.84 (s, 3H);  $^{13}C\{H\}$  NMR (100 MHz,  $CDCl_3$ )  $\delta$  163.70, 142.31 (d,  $^3J_{C-P} = 16.9$  Hz), 136.67, 130.04, 129.89, 126.66, 54.49 (d,  $^2J_{C-P} = 6.0$  Hz), 52.85;  $^{31}P\{H\}$  NMR (162 MHz,  $CDCl_3$ )  $\delta$  1.33; HRMS for  $C_{11}H_{14}ClN_2O_5PNa^+$ : calcd.  $[M+Na]^+$ : 343.0227, found: 343.0217

**Methyl (E)-2-(4-bromophenyl)-2-(2-(dimethoxyphosphoryl)hydrazineylidene)acetate (3g)**<sup>7</sup>

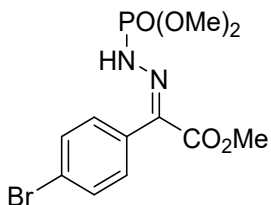

White solid; isolated yield 70% (54 mg).  $R_f$  0.50 (50% EtOAc/hexane); Mp 150-152 °C;  $^1H$  NMR (400 MHz,  $CDCl_3$ )  $\delta$  7.64-7.66 (m, 2H), 7.12-7.14 (m, 2H), 7.08 (d,  $^2J_{H-P} = 31.2$  Hz, 1H), 3.84 (d,  $^3J_{H-P} = 11.4$  Hz, 6H merged with s at 3.82), 3.82 (s, 3H);  $^{13}C\{H\}$  NMR (100 MHz,  $CDCl_3$ )  $\delta$  163.62, 142.33 (d,  $^3J_{C-P} = 16.6$  Hz), 133.00, 130.06, 127.14, 124.92, 54.50 (d,  $^2J_{C-P} = 5.9$  Hz), 52.85;  $^{31}P\{H\}$  NMR (162 MHz,  $CDCl_3$ )  $\delta$  1.30; HRMS for  $C_{11}H_{14}BrN_2O_5PNa^+$ : calcd.  $[M+Na]^+$ : 386.9721, found: 386.9711

**Methyl (E)-2-(2-(dimethoxyphosphoryl)hydrazineylidene)-2-(4-fluorophenyl)acetate (3h)**<sup>7</sup>

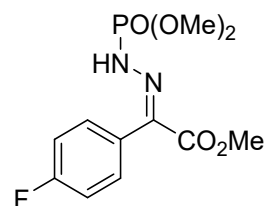

White solid; isolated yield 85% (55 mg).  $R_f$  0.50 (60% EtOAc/hexane); Mp 144-146 °C;  $^1H$  NMR (400 MHz,  $CDCl_3$ )  $\delta$  7.20-7.29 (m, 4H), 7.06 (d,  $^2J_{H-P} = 30.2$  Hz, 1H), 3.86 (d,  $^3J_{H-P} = 11.4$  Hz, 6H), 3.84 (s, 3H);  $^{13}C\{H\}$  NMR (100 MHz,  $CDCl_3$ )  $\delta$  163.86, 163.58 (d,  $^1J_{C-F} = 250.0$  Hz), 142.50, (d,  $^3J_{C-P} = 16.8$  Hz), 130.65 (d,  $^3J_{C-F} = 8.5$  Hz), 124.24 (d,  $^4J_{C-F} = 3.5$  Hz), 116.98 (d,  $^2J_{C-F} = 21.8$  Hz), 54.46 (d,  $^2J_{C-P} = 5.9$  Hz), 52.81;  $^{31}P\{H\}$  NMR (162 MHz,  $CDCl_3$ )  $\delta$  1.41;  $^{19}F\{H\}$  NMR (376 MHz,  $CDCl_3$ )  $\delta$  -108.96; HRMS for  $C_{11}H_{14}FN_2O_5PNa^+$ : calcd.  $[M+Na]^+$ : 327.0522, found: 327.0528

**Methyl (E)-2-(2-(dimethoxyphosphoryl)hydrazineylidene)-2-(3-(trifluoromethyl)phenyl)acetate (3i)**

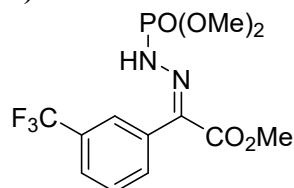

White solid; isolated yield 62% (44 mg).  $R_f$  0.50 (40% EtOAc/hexane); Mp 159-160 °C;  $^1\text{H}$  NMR (400 MHz,  $\text{CDCl}_3$ )  $\delta$  7.74 (d,  $J = 7.9$  Hz, 1H), 7.65 (t,  $J = 7.7$  Hz, 1H), 7.51 (s, 1H), 7.44 (d,  $J = 7.6$  Hz, 1H), 7.12 (d,  $^2J_{\text{H-P}} = 29.9$  Hz, 1H), 3.83 (d,  $^3J_{\text{H-P}} = 11.4$  Hz, 6H), 3.82 (s, 3H);  $^{13}\text{C}\{\text{H}\}$  NMR (100 MHz,  $\text{CDCl}_3$ )  $\delta$  163.56, 141.67 (d,  $^3J_{\text{C-P}} = 17.0$  Hz), 132.15 (q,  $^2J_{\text{C-F}} = 32.8$  Hz), 131.90, 130.19, 129.52, 127.12 (q,  $J_{\text{C-F}} = 3.6$  Hz), 125.55 (q,  $J_{\text{C-F}} = 3.6$  Hz), 123.49 (q,  $^1J_{\text{C-F}} = 271.0$  Hz), 54.47 (d,  $^2J_{\text{C-P}} = 5.9$  Hz), 52.86;  $^{31}\text{P}\{\text{H}\}$  NMR (162 MHz,  $\text{CDCl}_3$ )  $\delta$  1.09;  $^{19}\text{F}\{\text{H}\}$  NMR (376 MHz,  $\text{CDCl}_3$ )  $\delta$  -62.84; HRMS for  $\text{C}_{12}\text{H}_{14}\text{F}_3\text{N}_2\text{O}_5\text{PNa}^+$ : calcd.  $[\text{M}+\text{Na}]^+$ : 377.0490, found: 377.0487

**Methyl (E)-2-(2-(dimethoxyphosphoryl)hydrazineylidene)-2-(4-(trifluoromethyl)phenyl)acetate (3j)**

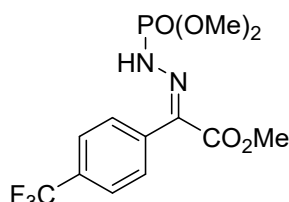

White solid; isolated yield 76% (54 mg).  $R_f$  0.50 (40% EtOAc/hexane); Mp 156-157 °C;  $^1\text{H}$  NMR (400 MHz,  $\text{CDCl}_3$ )  $\delta$  7.80 (d,  $J = 8.1$  Hz, 2H), 7.41 (d,  $J = 8.0$  Hz, 2H), 7.01 (d,  $^2J_{\text{H-P}} = 29.9$  Hz, 1H), 3.86 (d,  $^3J_{\text{H-P}} = 11.4$  Hz, 6H), 3.85 (s, 3H);  $^{13}\text{C}\{\text{H}\}$  NMR (100 MHz,  $\text{CDCl}_3$ )  $\delta$  163.49, 141.86 (d,  $^3J_{\text{C-P}} = 16.9$  Hz), 132.41 (q,  $J_{\text{C-F}} = 32.5$  Hz), 132.23, 129.11, 126.65 (q,  $J_{\text{C-F}} = 3.6$  Hz), 123.52 (q,  $^1J_{\text{C-F}} = 271.1$  Hz), 54.52 (d,  $^2J_{\text{C-P}} = 6.0$  Hz), 52.90;  $^{31}\text{P}\{\text{H}\}$  NMR (162 MHz,  $\text{CDCl}_3$ )  $\delta$  1.09;  $^{19}\text{F}\{\text{H}\}$  NMR (376 MHz,  $\text{CDCl}_3$ )  $\delta$  -63.18; HRMS for  $\text{C}_{12}\text{H}_{14}\text{F}_3\text{N}_2\text{O}_5\text{PNa}^+$ : calcd.  $[\text{M}+\text{Na}]^+$ : 377.0490, found: 377.0498

**Methyl (E)-2-(2-(dimethoxyphosphoryl)hydrazineylidene)-2-(2-nitrophenyl)acetate (3k)**

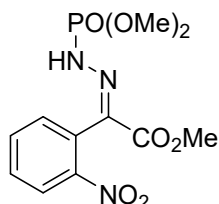

White solid; isolated yield 33% (22 mg).  $R_f$  0.50 (40% EtOAc/hexane); Mp 186-188 °C;  $^1\text{H}$  NMR (400 MHz,  $\text{CDCl}_3$ )  $\delta$  8.33 (dd,  $J = 8.2$  Hz, 1.2 Hz, 1H), 7.78-7.82 (m, 1H), 7.70-7.74 (m, 1H), 7.34 (dd,  $J = 7.5$  Hz, 1.4 Hz, 1H), 7.03 (d,  $^2J_{\text{H-P}} = 29.1$  Hz, 1H), 3.86 (d,  $^3J_{\text{H-P}} = 11.3$  Hz, 3H), 3.81 (s, 3H), 3.78 (d,  $^3J_{\text{H-P}} = 11.6$  Hz, 3H);  $^{13}\text{C}\{\text{H}\}$  NMR (100 MHz,  $\text{CDCl}_3$ )  $\delta$  162.92, 147.66, 140.34 (d,  $^3J_{\text{C-P}} = 17.4$  Hz), 134.85, 131.48, 130.56, 125.75, 125.26, 54.57 (d,  $^2J_{\text{C-P}} = 6.0$  Hz), 54.21 (d,  $^2J_{\text{C-P}} = 5.7$  Hz), 52.93;  $^{31}\text{P}\{\text{H}\}$  NMR (162 MHz,  $\text{CDCl}_3$ )  $\delta$  1.10; HRMS for  $\text{C}_{11}\text{H}_{14}\text{N}_3\text{O}_7\text{PNa}^+$ : calcd.  $[\text{M}+\text{Na}]^+$ : 354.0467, found: 354.0467

**Selected X-ray crystallographic data for 3k**,  $\text{C}_{11}\text{H}_{14}\text{N}_3\text{O}_7\text{P}$ ,  $M = 331.22$ , Monoclinic,  $P 2_1/c$ ,  $a = 9.6313$  (2) Å,  $b = 8.3277$  (2) Å,  $c = 18.8433$  (3) Å,  $V = 1503.96$  (5) Å<sup>3</sup>,  $\alpha = 90.00^\circ$ ,  $\beta$



= 95.670° (2),  $\gamma$  = 90.00°,  $Z$  = 4,  $D_c$  = 1.463 g cm<sup>-3</sup>,  $\mu$  (Mo-K $\alpha$ ) = 2.001 mm<sup>-1</sup>,  $F(000)$  = 688, Reflections collected/unique 10723/3050,  $[R(\text{int}) = 0.0372]$ . Final R indices  $[I > 2\sigma(I)]$ ,  $R1 = 0.0649$ ,  $wR = 0.1805$

**Methyl (*E*)-2-(2-(dimethoxyphosphoryl)hydrazineylidene)-2-(4-nitrophenyl)acetate (3l)**

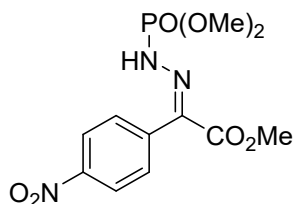

Yellow solid; isolated yield 55% (36 mg).  $R_f$  0.50 (40% EtOAc/hexane); Mp 82-83 °C; <sup>1</sup>H NMR (400 MHz, CDCl<sub>3</sub>)  $\delta$  8.39 (d,  $J$  = 8.7 Hz, 2H), 7.49 (d,  $J$  = 8.7 Hz, 2H), 6.96 (d,  $^2J_{\text{H-P}}$  = 29.6 Hz, 1H), 3.87 (d,  $^3J_{\text{H-P}}$  = 11.1 Hz, 6H merged with s at 3.86), 3.86 (s, 3H); <sup>13</sup>C{<sup>1</sup>H} NMR (100 MHz, CDCl<sub>3</sub>)  $\delta$  158.49, 144.06, 136.19, 130.29, 125.26, 119.95, 49.87 (d,  $^2J_{\text{C-P}}$  = 6.1 Hz), 48.26; <sup>31</sup>P{<sup>1</sup>H} NMR (162 MHz, CDCl<sub>3</sub>)  $\delta$  0.76; HRMS for C<sub>11</sub>H<sub>14</sub>N<sub>3</sub>O<sub>7</sub>PK<sup>+</sup>: calcd.  $[M+K]^+$ : 370.0206, found: 370.0197

**Methyl (*E*)-2-(2-(dimethoxyphosphoryl)hydrazineylidene)-2-(naphthalen-1-yl)acetate (3m)**

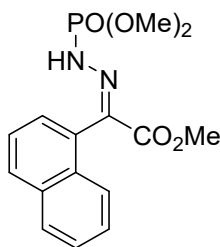

White solid; isolated yield 63% (45 mg).  $R_f$  0.50 (50% EtOAc/hexane); Mp 176-178 °C; <sup>1</sup>H NMR (400 MHz, CDCl<sub>3</sub>)  $\delta$  8.00 (d,  $J$  = 8.2 Hz, 1H), 7.95 (d,  $J$  = 7.8 Hz, 1H), 7.51-7.61 (m, 4H), 7.38 (dd,  $J$  = 7.0 Hz, 1.1 Hz, 1H), 6.75 (d,  $^2J_{\text{H-P}}$  = 30.7 Hz, 1H), 3.86 (d,  $^3J_{\text{H-P}}$  = 11.4 Hz, 3H), 3.83 (s, 3H), 3.82 (d,  $^3J_{\text{H-P}}$  = 11.4 Hz, 3H); <sup>13</sup>C{<sup>1</sup>H} NMR (100 MHz, CDCl<sub>3</sub>)  $\delta$  164.11, 143.23 (d,  $^3J_{\text{C-P}}$  = 17.2 Hz), 133.89, 130.86, 129.71, 129.14, 127.65, 127.27, 126.96, 126.23, 125.72, 123.74, 54.47 (d,  $^2J_{\text{C-P}}$  = 6.0 Hz), 54.26 (d,  $^2J_{\text{C-P}}$  = 5.8 Hz), 52.83; <sup>31</sup>P{<sup>1</sup>H} NMR (162 MHz, CDCl<sub>3</sub>)  $\delta$  1.45; HRMS for C<sub>15</sub>H<sub>17</sub>N<sub>2</sub>O<sub>5</sub>PNa<sup>+</sup>: calcd.  $[M+Na]^+$ : 359.0773, found: 359.0780

**Ethyl (*E*)-2-(benzo[d][1,3]dioxol-5-yl)-2-(2-(dimethoxyphosphoryl)hydrazineylidene)acetate (3n)**

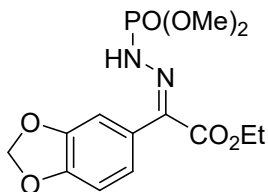

White solid; isolated yield 70% (48 mg).  $R_f$  0.50 (40% EtOAc/hexane); Mp 104-106 °C; <sup>1</sup>H NMR (400 MHz, CDCl<sub>3</sub>)  $\delta$  7.13 (d,  $^2J_{\text{H-P}}$  = 30.4 Hz, 1H), 6.92 (d,  $J$  = 7.8 Hz, 1H), 6.73 (d appearing as s, 1H, merged with s at 6.70), 6.70 (s, 1H), 6.03 (s, 2H), 4.29 (q,  $J$  = 7.0 Hz, 2 H), 3.85 (d,  $^3J_{\text{H-P}}$  = 11.3 Hz, 6H), 1.31 (t,  $J$  = 7.1 Hz, 3H); <sup>13</sup>C{<sup>1</sup>H} NMR (100 MHz, CDCl<sub>3</sub>)  $\delta$  163.51, 149.15, 148.76, 143.33 (d,  $^3J_{\text{C-P}}$  = 16.9 Hz), 122.34, 121.54, 109.40, 108.68, 101.69,

61.83, 54.47 (d,  $^2J_{C-P} = 6.0$  Hz), 14.17;  $^{31}\text{P}\{\text{H}\}$  NMR (162 MHz,  $\text{CDCl}_3$ )  $\delta$  1.53; HRMS for  $\text{C}_{13}\text{H}_{18}\text{N}_2\text{O}_7\text{P}^+$ : calcd.  $[\text{M}+\text{H}]^+$ : 345.0846, found: 345.0854

**Ethyl (*E*)-2-(2-(dimethoxyphosphoryl)hydrazineylidene)-2-(thiophen-3-yl)acetate (3o)**

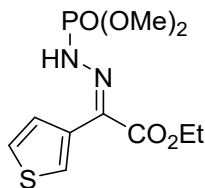

Yellow liquid; isolated yield 55% (34 mg).  $R_f$  0.50 (40% EtOAc/hexane);  $^1\text{H}$  NMR (400 MHz,  $\text{CDCl}_3$ )  $\delta$  7.51-7.53 (m, 2H), 7.34 (d,  $^2J_{H-P} = 30.2$  Hz, 1H), 7.12 (dd,  $J = 4.4$  Hz, 1.8 Hz, 1H), 4.31 (q,  $J = 7.1$  Hz, 2 H), 3.87 (d,  $^3J_{H-P} = 11.3$  Hz, 6H), 1.33 (t,  $J = 7.1$  Hz, 3H);  $^{13}\text{C}\{\text{H}\}$  NMR (100 MHz,  $\text{CDCl}_3$ )  $\delta$  163.39, 139.38 (d,  $^3J_{C-P} = 17.1$  Hz), 127.95, 127.65, 127.28, 126.91, 61.83, 54.53 (d,  $^2J_{C-P} = 6.1$  Hz), 14.15;  $^{31}\text{P}\{\text{H}\}$  NMR (162 MHz,  $\text{CDCl}_3$ )  $\delta$  1.51; HRMS for  $\text{C}_{10}\text{H}_{16}\text{N}_2\text{O}_5\text{PS}^+$ : calcd.  $[\text{M}+\text{H}]^+$ : 307.0512, found: 307.0504

**Allyl (*E*)-2-(2-(dimethoxyphosphoryl)hydrazineylidene)-2-phenylacetate (3p)**

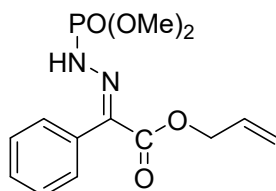

White solid; isolated yield 63% (39 mg).  $R_f$  0.50 (40% EtOAc/hexane); Mp 44-46 °C;  $^1\text{H}$  NMR (400 MHz,  $\text{CDCl}_3$ )  $\delta$  7.48-7.54 (m, 3H), 7.25-7.27 (m, 2H), 7.10 (d,  $^2J_{H-P} = 30.5$  Hz, 1H), 5.90-5.99 (m, 1H), 5.29-5.33 (m, 1H), 5.22-5.25 (m, 1H), 4.72-4.74 (m, 2H), 3.86 (d,  $^3J_{H-P} = 11.3$  Hz, 6H);  $^{13}\text{C}\{\text{H}\}$  NMR (100 MHz,  $\text{CDCl}_3$ )  $\delta$  163.10, 143.56 (d,  $^3J_{C-P} = 16.9$  Hz), 131.70, 130.35, 129.67, 128.40, 128.29, 118.44, 66.18, 54.50 (d,  $^2J_{C-P} = 6.0$  Hz);  $^{31}\text{P}\{\text{H}\}$  NMR (162 MHz,  $\text{CDCl}_3$ )  $\delta$  1.33; HRMS for  $\text{C}_{13}\text{H}_{18}\text{N}_2\text{O}_5\text{P}^+$ : calcd.  $[\text{M}+\text{H}]^+$ : 313.0948, found: 313.0947

**Prop-2-yn-1-yl (*E*)-2-(2-(dimethoxyphosphoryl)hydrazineylidene)-2-phenylacetate (3q)**

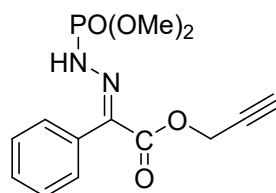

White solid; isolated yield 60% (37 mg).  $R_f$  0.50 (40% EtOAc/hexane); Mp 54-56 °C;  $^1\text{H}$  NMR (400 MHz,  $\text{CDCl}_3$ )  $\delta$  7.47-7.55 (m, 3H), 7.26-7.28 (m, 2H), 7.16 (d,  $^2J_{H-P} = 30.5$  Hz, 1H), 4.83 (d,  $J = 2.32$  Hz, 2H), 3.87 (d,  $^3J_{H-P} = 11.3$  Hz, 6H), 2.48 (s, 1H);  $^{13}\text{C}\{\text{H}\}$  NMR (100 MHz,  $\text{CDCl}_3$ )  $\delta$  162.71, 142.82 (d,  $^3J_{C-P} = 16.9$  Hz), 130.48, 129.71, 128.36, 128.00, 77.30, 75.24, 54.56 (d,  $^2J_{C-P} = 6.0$  Hz), 53.00;  $^{31}\text{P}\{\text{H}\}$  NMR (162 MHz,  $\text{CDCl}_3$ )  $\delta$  1.16; HRMS for  $\text{C}_{13}\text{H}_{15}\text{N}_2\text{O}_5\text{PNa}^+$ : calcd.  $[\text{M}+\text{Na}]^+$ : 333.0616, found: 333.0613

**Methyl (*E*)-2-(2-(diethoxyphosphoryl)hydrazineylidene)-2-phenylacetate (3r)<sup>7</sup>**

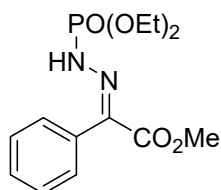

White solid; isolated yield 72% (45 mg).  $R_f$  0.50 (40% EtOAc/hexane); Mp 60-62 °C;  $^1\text{H}$  NMR (400 MHz,  $\text{CDCl}_3$ )  $\delta$  7.48-7.54 (m, 3H), 7.23-7.26 (m, 2H), 7.07 (d,  $^2J_{\text{H-P}} = 30.4$  Hz, 1H), 4.13-4.28 (m, 4H), 3.83 (s, 3H), 1.39 (td,  $J = 7.1$  Hz, 0.8 Hz, 6H);  $^{13}\text{C}\{\text{H}\}$  NMR (100 MHz,  $\text{CDCl}_3$ )  $\delta$  164.09, 143.05 (d,  $^3J_{\text{C-P}} = 17.0$  Hz), 130.29, 129.67, 128.56, 128.34, 64.13 (d,  $^2J_{\text{C-P}} = 5.8$  Hz), 52.67, 16.11 (d,  $^3J_{\text{C-P}} = 6.5$  Hz);  $^{31}\text{P}\{\text{H}\}$  NMR (162 MHz,  $\text{CDCl}_3$ )  $\delta$  -0.93; HRMS for  $\text{C}_{13}\text{H}_{20}\text{N}_2\text{O}_5\text{P}^+$ : calcd.  $[\text{M}+\text{H}]^+$ : 315.1104, found: 315.1102

**Methyl (*E*)-2-(2-(diisopropoxyphosphoryl)hydrazineylidene)-2-phenylacetate (3s)<sup>7</sup>**

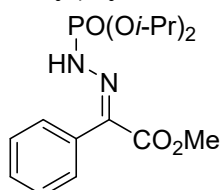

White solid; isolated yield 65% (44 mg).  $R_f$  0.50 (40% EtOAc/hexane); Mp 70-72 °C;  $^1\text{H}$  NMR (400 MHz,  $\text{CDCl}_3$ )  $\delta$  7.47-7.53 (m, 3H), 7.23 (d,  $J = 6.6$  Hz, 2H), 7.05 (d,  $^2J_{\text{H-P}} = 30.4$  Hz, 1H), 4.67-4.75 (m, 2H), 3.83 (s, 3H), 1.39 (d,  $J = 6.2$  Hz, 6H), 1.36 (d, 6.2 Hz, 6H);  $^{13}\text{C}\{\text{H}\}$  NMR (125 MHz,  $\text{CDCl}_3$ )  $\delta$  164.22, 142.37 (d,  $^3J_{\text{C-P}} = 17.0$  Hz), 130.17, 129.64, 128.76, 128.36, 73.05 (d,  $^2J_{\text{C-P}} = 5.8$  Hz), 52.53, 23.77 (d,  $^3J_{\text{C-P}} = 4.6$  Hz), 23.54 (d,  $^3J_{\text{C-P}} = 5.0$  Hz);  $^{31}\text{P}\{\text{H}\}$  NMR (162 MHz,  $\text{CDCl}_3$ )  $\delta$  -2.94; HRMS for  $\text{C}_{15}\text{H}_{23}\text{N}_2\text{O}_5\text{PNa}^+$ : calcd.  $[\text{M}+\text{Na}]^+$ : 365.1237, found: 365.1239

**Methyl (*E*)-2-(2-(bis(allyloxy)phosphoryl)hydrazineylidene)-2-phenylacetate (3t)<sup>7</sup>**

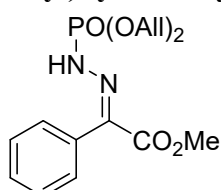

White solid; isolated yield 68% (46 mg).  $R_f$  0.50 (40% EtOAc/hexane); Mp 100-102 °C;  $^1\text{H}$  NMR (400 MHz,  $\text{CDCl}_3$ )  $\delta$  7.48-7.53 (m, 3H), 7.23 (d,  $J = 6.4$  Hz, 2H), 7.09 (d,  $^2J_{\text{H-P}} = 30.8$  Hz, 1H), 5.94-6.03 (m, 2H), 5.40 (d,  $J = 17.0$  Hz, 2H), 5.27 (d,  $J = 10.2$  Hz, 2H), 4.62-4.67 (m, 4H), 3.83 (s, 3H);  $^{13}\text{C}\{\text{H}\}$  NMR (125 MHz,  $\text{CDCl}_3$ )  $\delta$  164.01, 143.29 (d,  $^3J_{\text{C-P}} = 16.9$  Hz), 132.33 (d,  $^3J_{\text{C-P}} = 5.6$  Hz), 130.32, 129.65, 128.45, 128.32, 118.60, 68.49 (d,  $^2J_{\text{C-P}} = 5.7$  Hz), 52.68;  $^{31}\text{P}\{\text{H}\}$  NMR (162 MHz,  $\text{CDCl}_3$ )  $\delta$  -0.77; HRMS for  $\text{C}_{15}\text{H}_{20}\text{N}_2\text{O}_5\text{P}^+$ : calcd.  $[\text{M}+\text{H}]^+$ : 339.1104, found: 339.1091

**Dimethyl (*E*)-2-(2-(2-oxo-1,2-diphenylethylidene)hydrazineyl)phosphonate (3u)<sup>7</sup>**

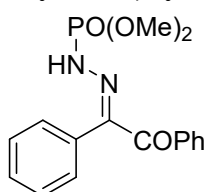

White solid; isolated yield 70% (46 mg).  $R_f$  0.50 (50% EtOAc/hexane); Mp 150-152 °C;  $^1\text{H}$  NMR (400 MHz,  $\text{CDCl}_3$ )  $\delta$  7.99 (d,  $J = 7.4$  Hz, 2H), 7.37-7.50 (m, 6H), 7.25 (d,  $J = 6.8$  Hz, 2H), 7.10 (d,  $^2J_{\text{H-P}} = 30.5$  Hz, 1H), 3.73 (d,  $^3J_{\text{H-P}} = 11.2$  Hz, 6H);  $^{13}\text{C}\{\text{H}\}$  NMR (100 MHz,  $\text{CDCl}_3$ )  $\delta$  190.61, 150.25 (d,  $^3J_{\text{C-P}} = 16.5$  Hz), 136.62, 132.68, 130.63, 130.30, 129.69, 128.61, 128.43, 127.99, 54.44 (d,  $^2J_{\text{C-P}} = 6.1$  Hz);  $^{31}\text{P}\{\text{H}\}$  NMR (162 MHz,  $\text{CDCl}_3$ )  $\delta$  1.40; HRMS for  $\text{C}_{16}\text{H}_{18}\text{N}_2\text{O}_4\text{P}^+$ : calcd.  $[\text{M}+\text{H}]^+$ : 333.0999, found: 333.0999

**Dimethyl (*E*)-(2-(2,2,2-trifluoro-1-phenylethylidene)hydrazineyl)phosphonate (3v)**

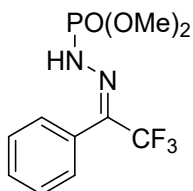

White solid; isolated yield 65% (51 mg).  $R_f$  0.50 (40% EtOAc/hexane); Mp 90-92 °C;  $^1\text{H}$  NMR (400 MHz,  $\text{CDCl}_3$ )  $\delta$  7.55 (br s, 3H), 7.32 (br s, 2H), 6.93 (d,  $^2J_{\text{H-P}} = 29.4$  Hz, 1H), 3.85 (d,  $^3J_{\text{H-P}} = 11.3$  Hz, 6H);  $^{13}\text{C}\{\text{H}\}$  NMR (100 MHz,  $\text{CDCl}_3$ )  $\delta$  140.78 (dd,  $^2J_{\text{C-F}} = 34.9$  Hz,  $^3J_{\text{C-P}} = 17.7$  Hz), 131.26, 130.03, 128.40, 125.52, 120.38 (q,  $^1J_{\text{C-F}} = 272.4$  Hz), 54.47 (d,  $^2J_{\text{C-P}} = 5.9$  Hz);  $^{31}\text{P}\{\text{H}\}$  NMR (162 MHz,  $\text{CDCl}_3$ )  $\delta$  1.36;  $^{19}\text{F}\{\text{H}\}$  NMR (376 MHz,  $\text{CDCl}_3$ )  $\delta$  -68.06; HRMS for  $\text{C}_{10}\text{H}_{13}\text{F}_3\text{N}_2\text{O}_3\text{P}^+$ : calcd.  $[\text{M}+\text{H}]^+$ : 297.0610, found: 297.0604

**Diethyl 2-(2-(dimethoxyphosphoryl)hydrazineylidene)malonate (3w)**

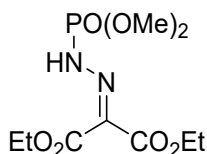

Colorless viscous liquid; isolated yield 56% (33 mg).  $R_f$  0.50 (40% EtOAc/hexane);  $^1\text{H}$  NMR (400 MHz,  $\text{CDCl}_3$ )  $\delta$  10.87 (d,  $^2J_{\text{H-P}} = 34.6$  Hz, 1H), 4.31-4.37 (m, 4), 3.86 (d,  $^3J_{\text{H-P}} = 11.4$  Hz, 6H), 1.35 (t,  $J = 7.0$  Hz, 3H), 1.34 (t,  $J = 7.0$  Hz, 3H);  $^{13}\text{C}\{\text{H}\}$  NMR (100 MHz,  $\text{CDCl}_3$ )  $\delta$  162.26, 160.43, 130.80 (d,  $^3J_{\text{C-P}} = 14.8$  Hz), 62.22, 61.93, 54.62 (d,  $^2J_{\text{C-P}} = 5.9$  Hz), 13.99, 13.88;  $^{31}\text{P}\{\text{H}\}$  NMR (162 MHz,  $\text{CDCl}_3$ )  $\delta$  -0.13; HRMS for  $\text{C}_9\text{H}_{18}\text{N}_2\text{O}_7\text{P}^+$ : calcd.  $[\text{M}+\text{H}]^+$ : 297.0846, found: 297.0830

**Dimethyl (2-(1,3-dioxo-1,3-diphenylpropan-2-ylidene)hydrazineyl)phosphonate (3x)**

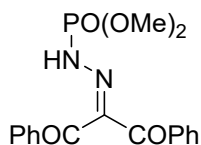

White solid; isolated yield 80% (57 mg).  $R_f$  0.50 (40% EtOAc/hexane); Mp 102-104 °C;  $^1\text{H}$  NMR (400 MHz,  $\text{CDCl}_3$ )  $\delta$  10.03 (d,  $^2J_{\text{H-P}} = 33.1$  Hz, 1H), 8.10-8.12 (m, 2H), 7.72-7.74 (m, 2H), 7.62-7.65 (m, 1H), 7.55-7.59 (m, 1H), 7.51 (t,  $J = 7.7$  Hz, 2H), 7.42 (t,  $J = 7.8$  Hz, 2H), 3.83 (d,  $^3J_{\text{H-P}} = 11.4$  Hz, 6H);  $^{13}\text{C}\{\text{H}\}$  NMR (100 MHz,  $\text{CDCl}_3$ )  $\delta$  191.42, 190.06, 143.18 (d,  $^3J_{\text{C-P}} = 13.8$  Hz), 135.93, 135.12, 134.19, 133.65, 130.67, 128.88, 128.69, 128.45, 54.67 (d,  $^2J_{\text{C-P}} = 5.9$  Hz);  $^{31}\text{P}\{\text{H}\}$  NMR (162 MHz,  $\text{CDCl}_3$ )  $\delta$  0.26; HRMS for  $\text{C}_{17}\text{H}_{18}\text{N}_2\text{O}_5\text{P}^+$ : calcd.  $[\text{M}+\text{H}]^+$ : 361.0948, found: 361.0944

**Methyl 2-(dimethoxyphosphoryl)-2-phenylacetate (4a)**<sup>8</sup>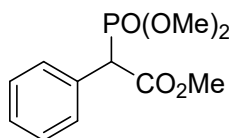

Colorless viscous liquid; isolated yield 55% (40 mg).  $R_f$  0.50 (40% EtOAc/hexane);  $^1\text{H}$  NMR (400 MHz,  $\text{CDCl}_3$ )  $\delta$  7.49-7.51 (m, 2H), 7.32-7.39 (m, 3H), 4.29 (d,  $^2J_{\text{H-P}} = 23.5$  Hz, 1H), 3.77 (s, 3H), 3.73 (d,  $^3J_{\text{H-P}} = 11.0$  Hz, 3H), 3.67 (d,  $^3J_{\text{H-P}} = 10.9$  Hz, 3H);  $^{13}\text{C}\{\text{H}\}$  NMR (100 MHz,  $\text{CDCl}_3$ )  $\delta$  168.01 (d,  $^2J_{\text{C-P}} = 3.0$  Hz), 130.57 (d,  $J_{\text{C-P}} = 8.6$  Hz), 129.56 (d,  $J_{\text{C-P}} = 6.2$  Hz), 128.71 (d,  $J_{\text{C-P}} = 2.3$  Hz), 128.18 (d,  $J_{\text{C-P}} = 2.9$  Hz), 54.08 (d,  $^2J_{\text{C-P}} = 6.7$  Hz), 53.70 (d,  $^2J_{\text{C-P}} = 7.1$  Hz), 52.95, 51.65 (d,  $^1J_{\text{C-P}} = 135.2$  Hz);  $^{31}\text{P}\{\text{H}\}$  NMR (162 MHz,  $\text{CDCl}_3$ )  $\delta$  21.11; HRMS for  $\text{C}_{11}\text{H}_{16}\text{O}_5\text{P}^+$ : calcd.  $[\text{M}+\text{H}]^+$ : 259.0730, found: 259.0730

**Methyl 2-(dimethoxyphosphoryl)-2-(4-methoxyphenyl)acetate (4b)**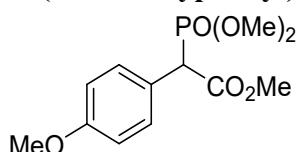

Colorless viscous liquid; isolated yield 60% (35 mg).  $R_f$  0.50 (40% EtOAc/hexane);  $^1\text{H}$  NMR (400 MHz,  $\text{CDCl}_3$ )  $\delta$  7.40-7.43 (m, 2H), 6.89 (d,  $J = 8.5$  Hz, 2H), 4.23 (d,  $^2J_{\text{H-P}} = 23.5$  Hz, 1H), 3.80 (s, 3H), 3.76 (s, 3H), 3.73 (d,  $^3J_{\text{H-P}} = 11.0$  Hz, 3H), 3.67 (d,  $^3J_{\text{H-P}} = 10.8$  Hz, 3H);  $^{13}\text{C}\{\text{H}\}$  NMR (100 MHz,  $\text{CDCl}_3$ )  $\delta$  168.23 (d,  $^2J_{\text{C-P}} = 2.5$  Hz), 159.51 (d,  $J_{\text{C-P}} = 2.7$  Hz), 130.68 ( $J_{\text{C-P}} = 6.2$  Hz), 122.38 ( $J_{\text{C-P}} = 8.7$  Hz), 114.16 ( $J_{\text{C-P}} = 2.2$  Hz), 55.26, 54.08 (d,  $^2J_{\text{C-P}} = 6.6$  Hz), 53.69 (d,  $^2J_{\text{C-P}} = 7.2$  Hz), 52.91, 50.69 (d,  $^1J_{\text{C-P}} = 136.3$  Hz);  $^{31}\text{P}\{\text{H}\}$  NMR (162 MHz,  $\text{CDCl}_3$ )  $\delta$  21.43; HRMS for  $\text{C}_{12}\text{H}_{18}\text{O}_6\text{P}^+$ : calcd.  $[\text{M}+\text{H}]^+$ : 289.0836, found: 289.0814

**Methyl 2-([1,1'-biphenyl]-4-yl)-2-(dimethoxyphosphoryl)acetate (4c)**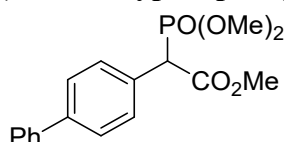

Colorless viscous liquid; isolated yield 52% (35 mg).  $R_f$  0.50 (40% EtOAc/hexane);  $^1\text{H}$  NMR (400 MHz,  $\text{CDCl}_3$ )  $\delta$  7.55-7.61 (m, 6H), 7.42-7.46 (m, 2H), 7.33-7.37 (m, 1H), 4.34 (d,  $^2J_{\text{H-P}} = 23.5$  Hz, 1H), 3.79 (s, 3H), 3.76 (d,  $^3J_{\text{H-P}} = 11.0$  Hz, 3H), 3.72 (d,  $^3J_{\text{H-P}} = 10.9$  Hz, 3H);  $^{13}\text{C}\{\text{H}\}$  NMR (100 MHz,  $\text{CDCl}_3$ )  $\delta$  168.01 (d,  $^2J_{\text{C-P}} = 3.3$  Hz), 141.07 (d,  $J_{\text{C-P}} = 2.9$  Hz), 140.40, 129.94 (d,  $J_{\text{C-P}} = 6.4$  Hz), 129.53 (d,  $J_{\text{C-P}} = 8.7$  Hz), 128.81, 127.51, 127.41 (d,  $J_{\text{C-P}} = 2.2$  Hz), 127.08, 54.13 (d,  $^2J_{\text{C-P}} = 6.6$  Hz), 53.78 (d,  $^2J_{\text{C-P}} = 7.0$  Hz), 53.02, 51.32 (d,  $^1J_{\text{C-P}} = 135.2$  Hz);  $^{31}\text{P}\{\text{H}\}$  NMR (162 MHz,  $\text{CDCl}_3$ )  $\delta$  21.08; HRMS for  $\text{C}_{17}\text{H}_{20}\text{O}_5\text{P}^+$ : calcd.  $[\text{M}+\text{H}]^+$ : 335.1043, found: 335.1029

**Methyl 2-(dimethoxyphosphoryl)-2-(4-fluorophenyl)acetate (4d)**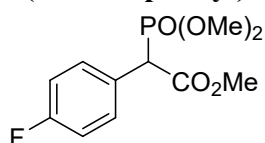

Colorless viscous liquid; isolated yield 48% (26 mg).  $R_f$  0.50 (40% EtOAc/hexane);  $^1\text{H}$  NMR (400 MHz,  $\text{CDCl}_3$ )  $\delta$  7.47-7.51 (m, 2H), 7.05 (t,  $J = 8.5$  Hz, 2H), 4.27 (d,  $^2J_{\text{H-P}} = 23.8$  Hz, 1H), 3.77 (s, 3H), 3.74 (d,  $^3J_{\text{H-P}} = 11.0$  Hz, 3H), 3.68 (d,  $^3J_{\text{H-P}} = 10.9$  Hz, 3H);  $^{13}\text{C}\{\text{H}\}$  NMR

(100 MHz, CDCl<sub>3</sub>) δ 167.89 (d, <sup>2</sup>J<sub>C-P</sub> = 4.0 Hz), 162.64 (d, <sup>1</sup>J<sub>C-F</sub> = 249.2 Hz), 131.30 (dd, <sup>3</sup>J<sub>C-F</sub> = 7.9 Hz, J<sub>C-P</sub> = 6.7 Hz), 126.39 (dd, <sup>4</sup>J<sub>C-F</sub> = 3.0 Hz, J<sub>C-P</sub> = 8.5 Hz), 115.66 (dd, <sup>2</sup>J<sub>C-F</sub> = 21.3 Hz, J<sub>C-P</sub> = 2.2 Hz), 54.06 (d, <sup>2</sup>J<sub>C-P</sub> = 6.6 Hz), 53.74 (d, <sup>2</sup>J<sub>C-P</sub> = 7.0 Hz), 53.02, 50.75 (d, <sup>1</sup>J<sub>C-P</sub> = 135.4 Hz); <sup>31</sup>P{H} NMR (162 MHz, CDCl<sub>3</sub>) δ 20.84 (d, J<sub>P-F</sub> = 5.0 Hz); <sup>19</sup>F{H} NMR (376 MHz, CDCl<sub>3</sub>) δ -113.96 (d, J<sub>F-P</sub> = 4.4 Hz); HRMS for C<sub>11</sub>H<sub>15</sub>FO<sub>5</sub>P<sup>+</sup>: calcd. [M+H]<sup>+</sup>: 277.0636, found: 277.0627

**Methyl 2-(dimethoxyphosphoryl)-2-(4-nitrophenyl)acetate (4e)<sup>8</sup>**

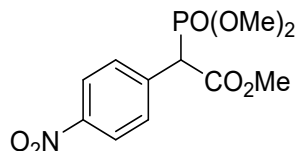

Colorless viscous liquid; isolated yield 45% (27 mg). *R<sub>f</sub>* 0.50 (40% EtOAc/hexane); <sup>1</sup>H NMR (400 MHz, CDCl<sub>3</sub>) δ 8.22 (d, *J* = 8.6 Hz, 2H), 7.70 (dd, *J* = 8.9 Hz, 2.2 Hz, 2H), 4.41 (d, <sup>2</sup>J<sub>H-P</sub> = 24.1 Hz, 1H), 3.81 (s, 3H), 3.77 (d, <sup>3</sup>J<sub>H-P</sub> = 11.1 Hz, 3H), 3.73 (d, <sup>3</sup>J<sub>H-P</sub> = 11.0 Hz, 3H); <sup>13</sup>C{H} NMR (100 MHz, CDCl<sub>3</sub>) δ 166.98 (d, <sup>2</sup>J<sub>C-P</sub> = 4.4 Hz), 147.73 (d, J<sub>C-P</sub> = 3.2 Hz), 138.04 (J<sub>C-P</sub> = 8.5 Hz), 130.62 (J<sub>C-P</sub> = 6.3 Hz), 123.72 (J<sub>C-P</sub> = 2.2 Hz), 54.19 (d, <sup>2</sup>J<sub>C-P</sub> = 6.6 Hz), 53.99 (d, <sup>2</sup>J<sub>C-P</sub> = 6.9 Hz), 53.33, 51.44 (d, <sup>1</sup>J<sub>C-P</sub> = 133.4 Hz); <sup>31</sup>P{H} NMR (162 MHz, CDCl<sub>3</sub>) δ 19.43; HRMS for C<sub>11</sub>H<sub>15</sub>NO<sub>7</sub>P<sup>+</sup>: calcd. [M+H]<sup>+</sup>: 304.0581, found: 304.0576

**Methyl 2-(dimethoxyphosphoryl)-2-(naphthalen-1-yl)acetate (4f)**

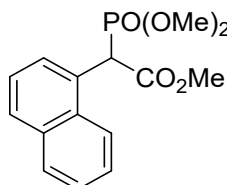

Colorless viscous liquid; isolated yield 50% (31 mg). *R<sub>f</sub>* 0.50 (40% EtOAc/hexane); <sup>1</sup>H NMR (400 MHz, CDCl<sub>3</sub>) δ 8.06 (d, *J* = 8.5 Hz, 1H), 8.00 (dd, *J* = 7.1 Hz, 2.5 Hz, 1H), 7.87 (d, *J* = 8.0 Hz, 1H), 7.84 (d, *J* = 8.2 Hz, 1H), 7.57 (t, *J* = 7.2 Hz, 1H), 7.49-7.53 (m, 2H), 5.17 (d, <sup>2</sup>J<sub>H-P</sub> = 24.1 Hz, 1H), 3.74 (s, 3H), 3.73 (d, <sup>3</sup>J<sub>H-P</sub> = 11.0 Hz, 3H), 3.58 (d, <sup>3</sup>J<sub>H-P</sub> = 10.8 Hz, 3H); <sup>13</sup>C{H} NMR (100 MHz, CDCl<sub>3</sub>) δ 168.44 (d, <sup>2</sup>J<sub>C-P</sub> = 2.4 Hz), 134.03, 131.51 (J<sub>C-P</sub> = 6.8 Hz), 129.10, 128.89 (d, J<sub>C-P</sub> = 2.9 Hz), 127.95 (J<sub>C-P</sub> = 6.3 Hz), 126.81, 126.68 (d, J<sub>C-P</sub> = 7.9 Hz), 125.81, 125.40 (d, J<sub>C-P</sub> = 3.0 Hz), 122.77, 54.01 (d, <sup>2</sup>J<sub>C-P</sub> = 6.6 Hz), 53.69 (d, <sup>2</sup>J<sub>C-P</sub> = 7.0 Hz), 53.04, 46.25 (d, <sup>1</sup>J<sub>C-P</sub> = 139.3 Hz); <sup>31</sup>P{H} NMR (162 MHz, CDCl<sub>3</sub>) δ 21.67; HRMS for C<sub>15</sub>H<sub>18</sub>O<sub>5</sub>P<sup>+</sup>: calcd. [M+H]<sup>+</sup>: 309.0886, found: 309.0889

**Ethyl 2-(3-chlorophenyl)-2-(dimethoxyphosphoryl)acetate (4g)**

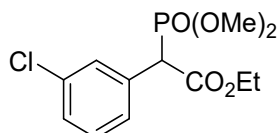

Colorless viscous liquid; isolated yield 45% (28 mg). *R<sub>f</sub>* 0.50 (40% EtOAc/hexane); <sup>1</sup>H NMR (400 MHz, CDCl<sub>3</sub>) δ 7.43 (s, 1H), 7.31-7.34 (m, 1H), 7.20-7.21 (m, 2H), 4.08-4.20 (m, 3H), 3.66 (d, <sup>3</sup>J<sub>H-P</sub> = 11.0 Hz, 3H), 3.63 (d, <sup>3</sup>J<sub>H-P</sub> = 11.0 Hz, 3H), 1.19 (t, 3H); <sup>13</sup>C{H} NMR (100 MHz, CDCl<sub>3</sub>) δ 166.70 (d, <sup>2</sup>J<sub>C-P</sub> = 3.6 Hz), 134.09 (d, J<sub>C-P</sub> = 2.7 Hz), 132.45 (d, J<sub>C-P</sub> = 8.5 Hz), 129.55 (J<sub>C-P</sub> = 2.3 Hz), 129.34 (J<sub>C-P</sub> = 6.4 Hz), 128.03 (J<sub>C-P</sub> = 2.8 Hz), 127.59 (J<sub>C-P</sub> = 6.3 Hz), 61.90, 53.79 (d, <sup>2</sup>J<sub>C-P</sub> = 6.6 Hz), 53.51 (d, <sup>2</sup>J<sub>C-P</sub> = 7.1 Hz), 51.05 (d, <sup>1</sup>J<sub>C-P</sub> = 134.4 Hz),

13.71;  $^{31}\text{P}\{\text{H}\}$  NMR (162 MHz,  $\text{CDCl}_3$ )  $\delta$  20.59; HRMS for  $\text{C}_{12}\text{H}_{17}\text{ClO}_5\text{P}^+$ : calcd.  $[\text{M}+\text{H}]^+$ : 307.0497, found: 307.0491

**Allyl 2-(dimethoxyphosphoryl)-2-phenylacetate (4h)<sup>8</sup>**

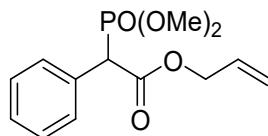

Colorless viscous liquid; isolated yield 66% (38 mg).  $R_f$  0.50 (50% EtOAc/hexane);  $^1\text{H}$  NMR (400 MHz,  $\text{CDCl}_3$ )  $\delta$  7.42-7.44 (m, 2H), 7.23-7.30 (m, 3H), 5.77-5.87 (m, 1H), 5.24 (dd,  $J = 17.2$  Hz, 1.4 Hz, 1H), 5.15 (dd,  $J = 10.4$  Hz, 1.1 Hz, 1H), 4.53-4.63 (m, 2H), 4.24 (d,  $^2J_{\text{H-P}} = 23.5$  Hz, 1H), 3.64 (d,  $^3J_{\text{H-P}} = 11.0$  Hz, 3H), 3.59 (d,  $^3J_{\text{H-P}} = 10.9$  Hz, 3H);  $^{13}\text{C}\{\text{H}\}$  NMR (100 MHz,  $\text{CDCl}_3$ )  $\delta$  167.18 (d,  $^2J_{\text{C-P}} = 3.1$  Hz), 131.41, 130.55 ( $J_{\text{C-P}} = 8.6$  Hz), 129.58 ( $J_{\text{C-P}} = 6.5$  Hz), 128.68 ( $J_{\text{C-P}} = 2.2$  Hz), 128.15 ( $J_{\text{C-P}} = 3.0$  Hz), 118.76, 66.38, 54.03 (d,  $^2J_{\text{C-P}} = 6.6$  Hz), 53.69 (d,  $^2J_{\text{C-P}} = 6.8$  Hz), 51.75 (d,  $^1J_{\text{C-P}} = 134.9$  Hz);  $^{31}\text{P}\{\text{H}\}$  NMR (162 MHz,  $\text{CDCl}_3$ )  $\delta$  21.14; HRMS for  $\text{C}_{13}\text{H}_{18}\text{O}_5\text{P}^+$ : calcd.  $[\text{M}+\text{H}]^+$ : 285.0886 found: 285.0882

**Methyl 2-(diethoxyphosphoryl)-2-phenylacetate (4i)<sup>8</sup>**

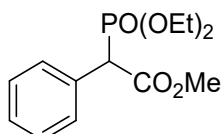

Colorless viscous liquid; isolated yield 60% (35 mg).  $R_f$  0.50 (40% EtOAc/hexane);  $^1\text{H}$  NMR (400 MHz,  $\text{CDCl}_3$ )  $\delta$  7.43-7.46 (m, 2H), 7.24-7.30 (m, 3H), 4.19 (d,  $^2J_{\text{H-P}} = 23.6$  Hz, 1H), 3.87-4.06 (m, 4H), 3.69 (s, 3H), 1.19 (t,  $J = 7.1$  Hz, 3H), 1.12 (t,  $J = 7.1$  Hz, 3H);  $^{13}\text{C}\{\text{H}\}$  NMR (100 MHz,  $\text{CDCl}_3$ )  $\delta$  168.16 (d,  $^2J_{\text{C-P}} = 3.4$  Hz), 130.86 (d,  $J_{\text{C-P}} = 8.3$  Hz), 129.64 ( $J_{\text{C-P}} = 6.5$  Hz), 128.56 ( $J_{\text{C-P}} = 2.3$  Hz), 128.02 ( $J_{\text{C-P}} = 2.9$  Hz), 63.49 (d,  $^2J_{\text{C-P}} = 6.8$  Hz), 63.16 (d,  $^2J_{\text{C-P}} = 7.0$  Hz), 52.80, 52.13 (d,  $^1J_{\text{C-P}} = 133.6$  Hz), 16.29 (d,  $^3J_{\text{C-P}} = 6.4$  Hz), 16.23 (d,  $^3J_{\text{C-P}} = 6.4$  Hz);  $^{31}\text{P}\{\text{H}\}$  NMR (162 MHz,  $\text{CDCl}_3$ )  $\delta$  18.54; HRMS for  $\text{C}_{13}\text{H}_{20}\text{O}_5\text{P}^+$ : calcd.  $[\text{M}+\text{H}]^+$ : 287.1043 found: 287.1043

## 6. References

1. S. Xia, Y. Jian, L. Zhang, C. Zhang, Y. An and Y. Wang, *RSC Adv.*, 2023, **13**, 14501-14505.
2. S. Zhu, F. Li, C. Empel, S. Jana, C. Pei, and R. M. Koenigs, *Adv. Synth. Catal.*, 2022, **364**, 3149-3154.
3. X. Lv, Z. Kang, D. Xing, and W. Hu, *Org. Lett.*, 2018, **20**, 4843-4847.
4. J.-L. Zhu and Y.-T. Tsai, *J. Org. Chem.*, 2021, **86**, 813-828.
5. CrysAlisPro, Oxford Diffraction /Agilent Technologies UK Ltd, Yarnton, England
6. G. M. Sheldrick, *Acta Crystallogr. Sect. A*, 2008, **64**, 112-122.
7. H. Jiang, H. Jin, A. Abdukader, A. Lin, Y. Chenga and C. Zhu, *Org. Biomol. Chem.*, 2013, **11**, 3612-3615.
8. H. E. Bartrum, D. C. Blakemore, C. J. Moody, and C. J. Hayes, *Tetrahedron*, 2013, **69**, 2276-2282.

7. Copies of  $^1\text{H}$ ,  $^{13}\text{C}\{\text{H}\}$ ,  $^{31}\text{P}\{\text{H}\}$ ,  $^{19}\text{F}\{\text{H}\}$  NMR Spectra & ESMS of crude 4a

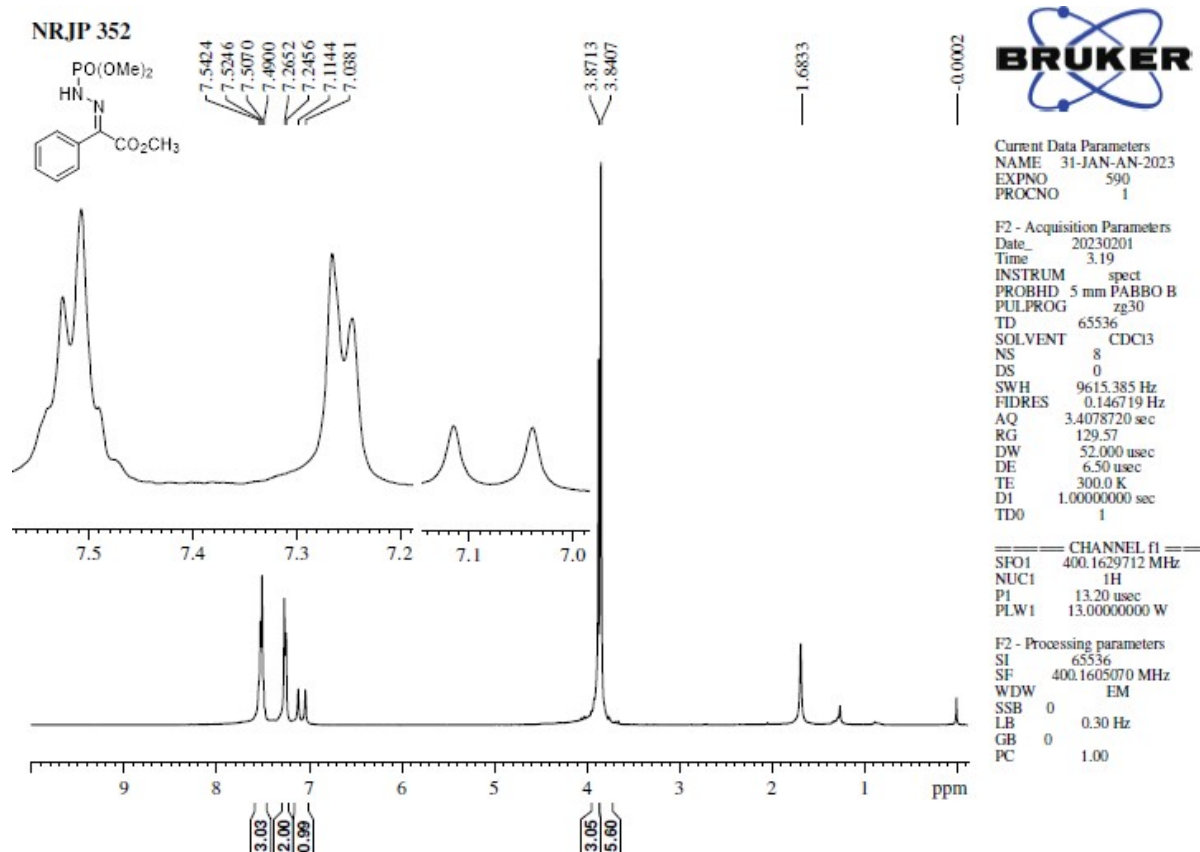

Figure S3:  $^1\text{H}$  NMR spectrum of 3a

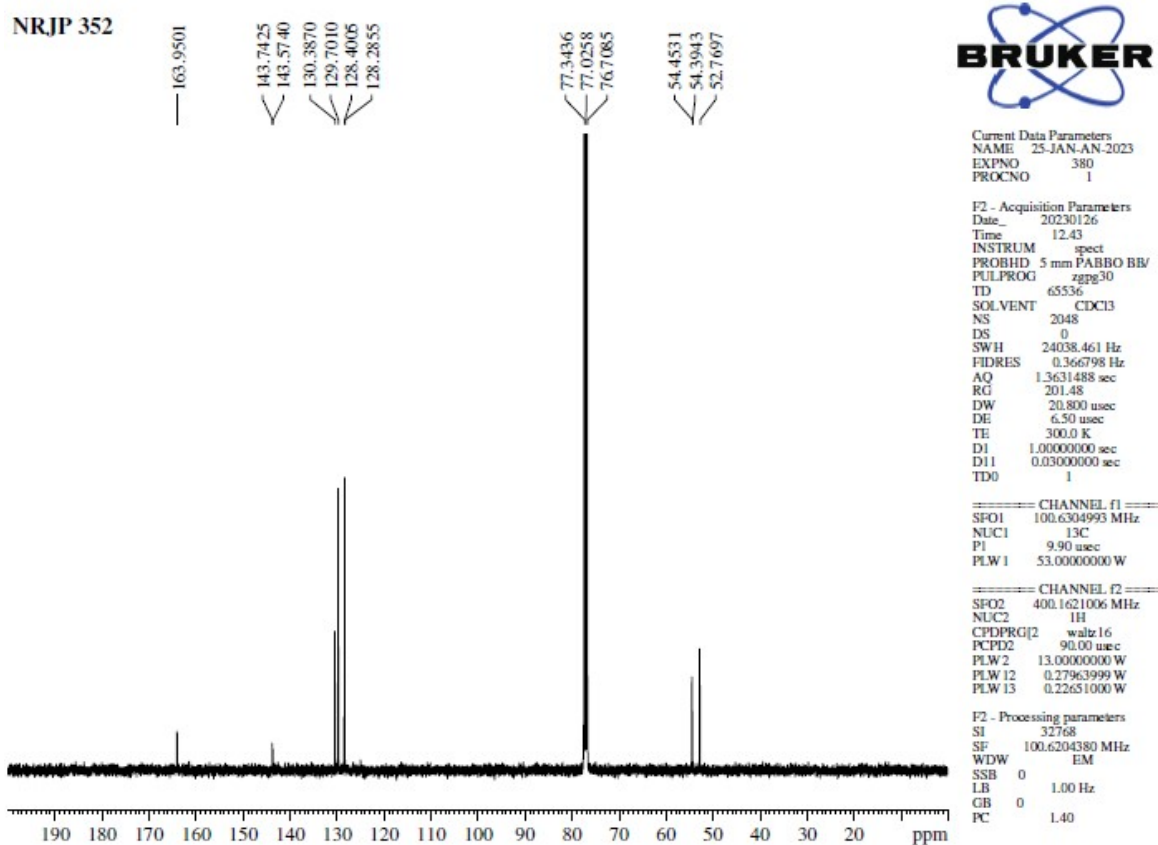

Figure S4:  $^{13}\text{C}\{\text{H}\}$  NMR spectrum of 3a



NRJP-352

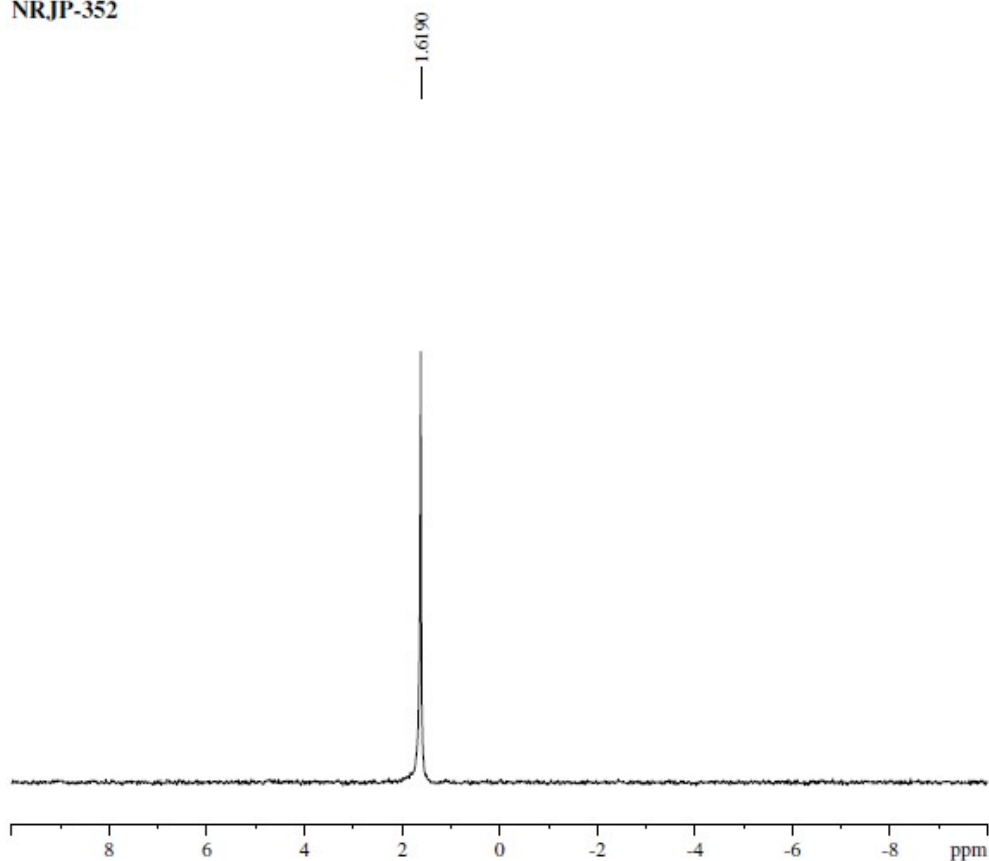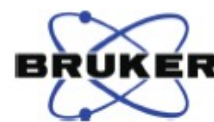

Current Data Parameters  
 NAME 31-JAN-AN-2023  
 EXPNO 600  
 PROCNO 1

F2 - Acquisition Parameters  
 Date\_ 20230201  
 Time 3.21  
 INSTRUM spect  
 PROBHD 5 mm PABBO BB  
 PULPROG zgpg30  
 TD 65536  
 SOLVENT CDCl3  
 NS 16  
 DS 4  
 SWH 64102.563 Hz  
 FIDRES 0.978127 Hz  
 AQ 0.5111808 sec  
 RG 201.48  
 DW 7.800 usec  
 DE 6.50 usec  
 TE 300.1 K  
 D1 2.00000000 sec  
 D11 0.03000000 sec  
 TD0 1

==== CHANNEL f1 ====  
 SFO1 161.9798402 MHz  
 NUC1 31P  
 P1 15.00 usec  
 PLW1 12.00000000 W

==== CHANNEL f2 ====  
 SFO2 400.1621006 MHz  
 NUC2 1H  
 CPDPRG2 waltz16  
 PCPD2 90.00 usec  
 PLW2 13.00000000 W  
 PLW12 0.27963999 W  
 PLW13 0.22651000 W

F2 - Processing parameters  
 SI 32768  
 SF 161.9879400 MHz  
 WDW EM  
 SSB 0  
 LB 1.00 Hz  
 GB 0  
 PC 1.40

Figure S5:  $^{31}\text{P}\{\text{H}\}$  NMR spectrum of 3a

NRJP-386

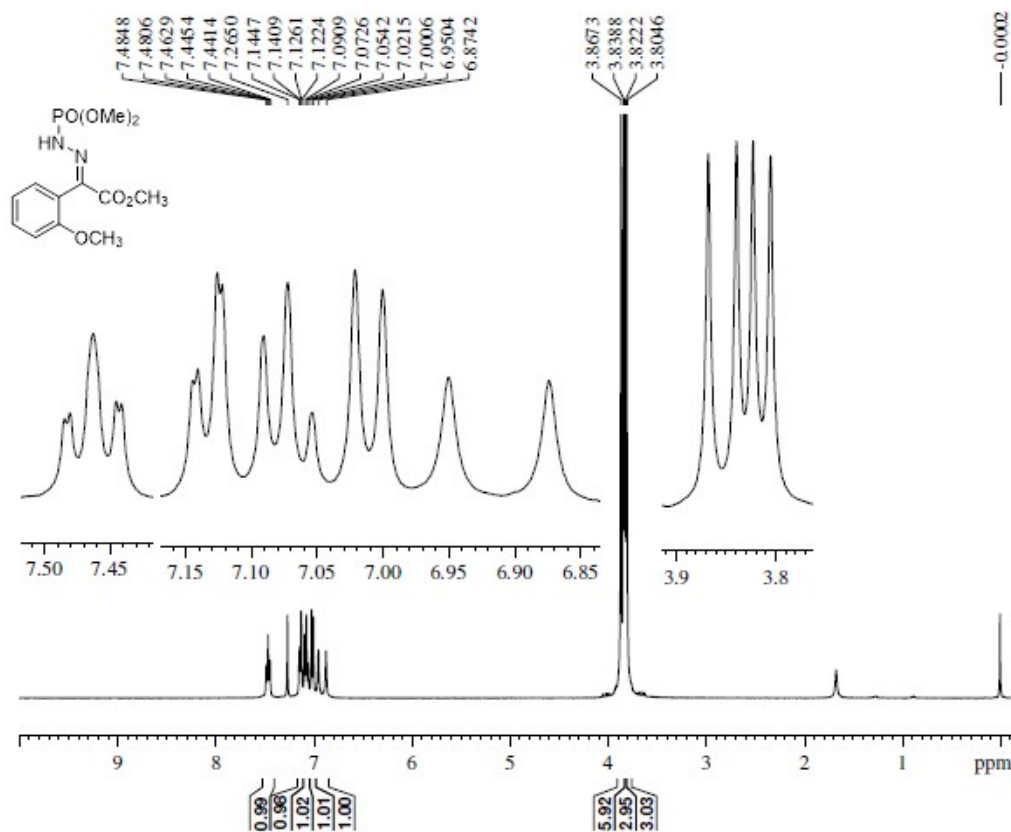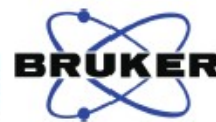

Current Data Parameters  
 NAME 11-Apr-AN-2023  
 EXPNO 450  
 PROCNO 1

F2 - Acquisition Parameters  
 Date\_ 20230411  
 Time 20.24  
 INSTRUM spect  
 PROBHD 5 mm PABBO BB  
 PULPROG zg30  
 TD 65536  
 SOLVENT CDCl3  
 NS 8  
 DS 0  
 SWH 9615.385 Hz  
 FIDRES 0.146719 Hz  
 AQ 3.4078720 sec  
 RG 129.57  
 DW 52.000 usec  
 DE 6.50 usec  
 TE 300.0 K  
 D1 1.00000000 sec  
 TD0 1

==== CHANNEL f1 ====  
 SFO1 400.1629712 MHz  
 NUC1 1H  
 P1 13.20 usec  
 PLW1 13.00000000 W

F2 - Processing parameters  
 SI 65536  
 SF 400.1605074 MHz  
 WDW EM  
 SSB 0  
 LB 0.30 Hz  
 GB 0  
 PC 1.00

Figure S6:  $^1\text{H}$  NMR spectrum of 3b

NRJP-386

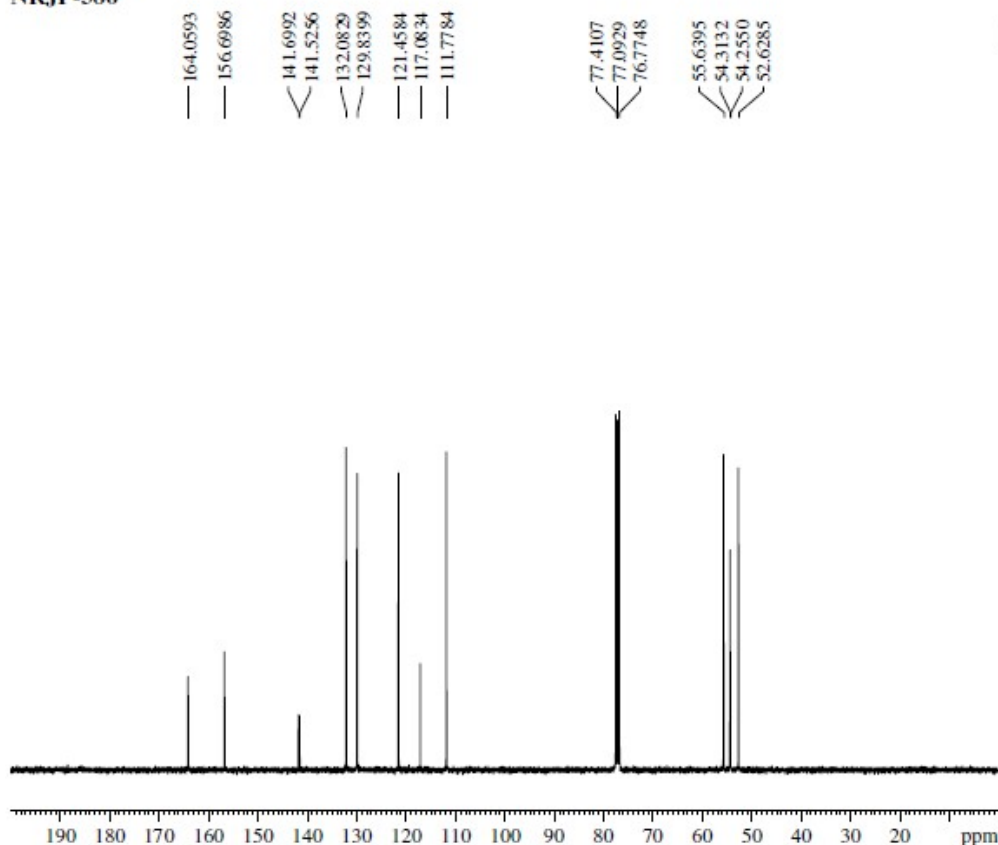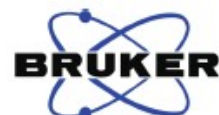

Current Data Parameters  
 NAME 29-Mar-AN-2023  
 EXPNO 400  
 PROCNO 1

F2 - Acquisition Parameters  
 Date\_ 20230330  
 Time 5.23  
 INSTRUM spect  
 PROBHD 5 mm PABBO BB  
 PULPROG zgpg30  
 TD 65536  
 SOLVENT CDCl3  
 NS 2048  
 DS 0  
 SWH 24038.461 Hz  
 FIDRES 0.366798 Hz  
 AQ 1.3631488 sec  
 RG 201.48  
 DW 20.800 usec  
 DE 6.50 usec  
 TE 300.0 K  
 D1 1.0000000 sec  
 D11 0.0300000 sec  
 TDO 1

==== CHANNEL f1 ====  
 SFO1 100.6304993 MHz  
 NUC1 13C  
 P1 9.90 usec  
 PLW1 53.0000000 W

==== CHANNEL f2 ====  
 SFO2 400.1621006 MHz  
 NUC2 1H  
 CPDPRG[2] waltz16  
 PCPD2 90.00 usec  
 PLW2 13.0000000 W  
 PLW12 0.27963999 W  
 PLW13 0.22651000 W

F2 - Processing parameters  
 SI 32768  
 SF 100.6204380 MHz  
 WDW EM  
 SSB 0  
 LB 1.00 Hz  
 GB 0  
 PC 1.40

Figure S7:  $^{13}\text{C}\{\text{H}\}$  NMR spectrum of 3b

NRJP386

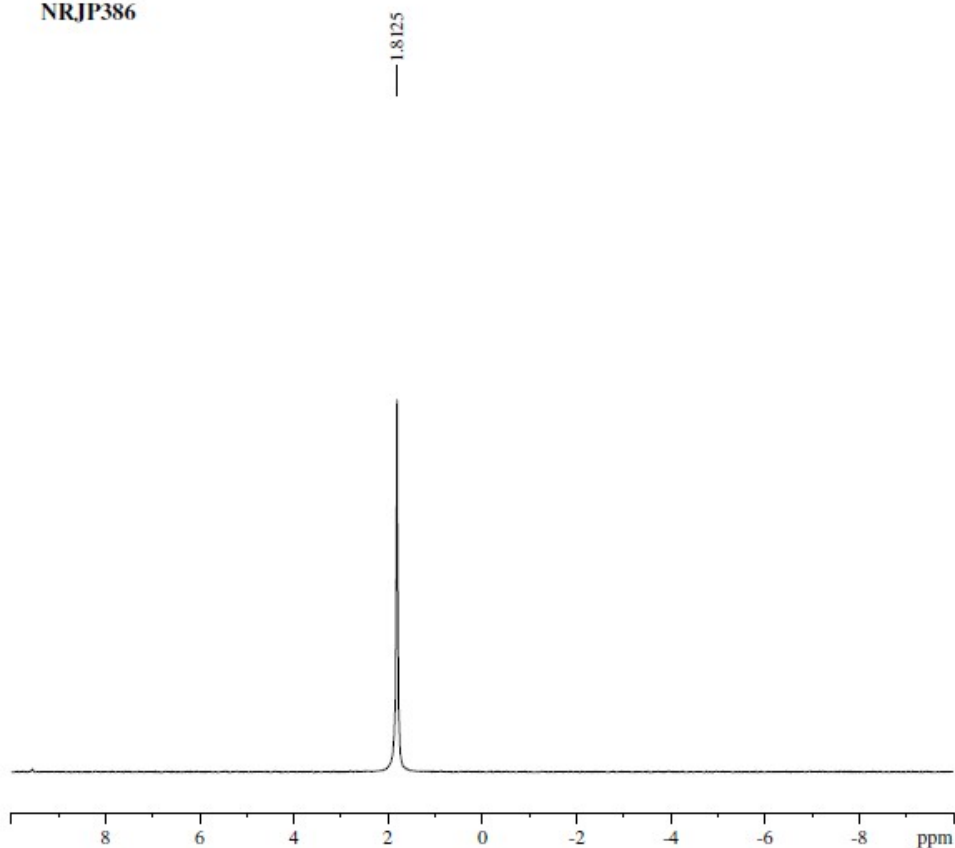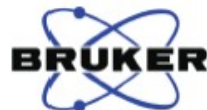

Current Data Parameters  
 NAME 27-MAR-AN-2023  
 EXPNO 380  
 PROCNO 1

F2 - Acquisition Parameters  
 Date\_ 20230327  
 Time 19.48  
 INSTRUM spect  
 PROBHD 5 mm PABBO BB  
 PULPROG zgpg30  
 TD 65536  
 SOLVENT CDCl3  
 NS 16  
 DS 4  
 SWH 64102.563 Hz  
 FIDRES 0.978127 Hz  
 AQ 0.5111808 sec  
 RG 201.48  
 DW 7.800 usec  
 DE 6.50 usec  
 TE 300.1 K  
 D1 2.0000000 sec  
 D11 0.0300000 sec  
 TDO 1

==== CHANNEL f1 ====  
 SFO1 161.9798402 MHz  
 NUC1 31P  
 P1 15.00 usec  
 PLW1 12.0000000 W

==== CHANNEL f2 ====  
 SFO2 400.1621006 MHz  
 NUC2 1H  
 CPDPRG[2] waltz16  
 PCPD2 90.00 usec  
 PLW2 13.0000000 W  
 PLW12 0.27963999 W  
 PLW13 0.22651000 W

F2 - Processing parameters  
 SI 32768  
 SF 161.9879400 MHz  
 WDW EM  
 SSB 0  
 LB 1.00 Hz  
 GB 0  
 PC 1.40

Figure S8:  $^{31}\text{P}\{\text{H}\}$  NMR spectrum of 3b

NRJP-385

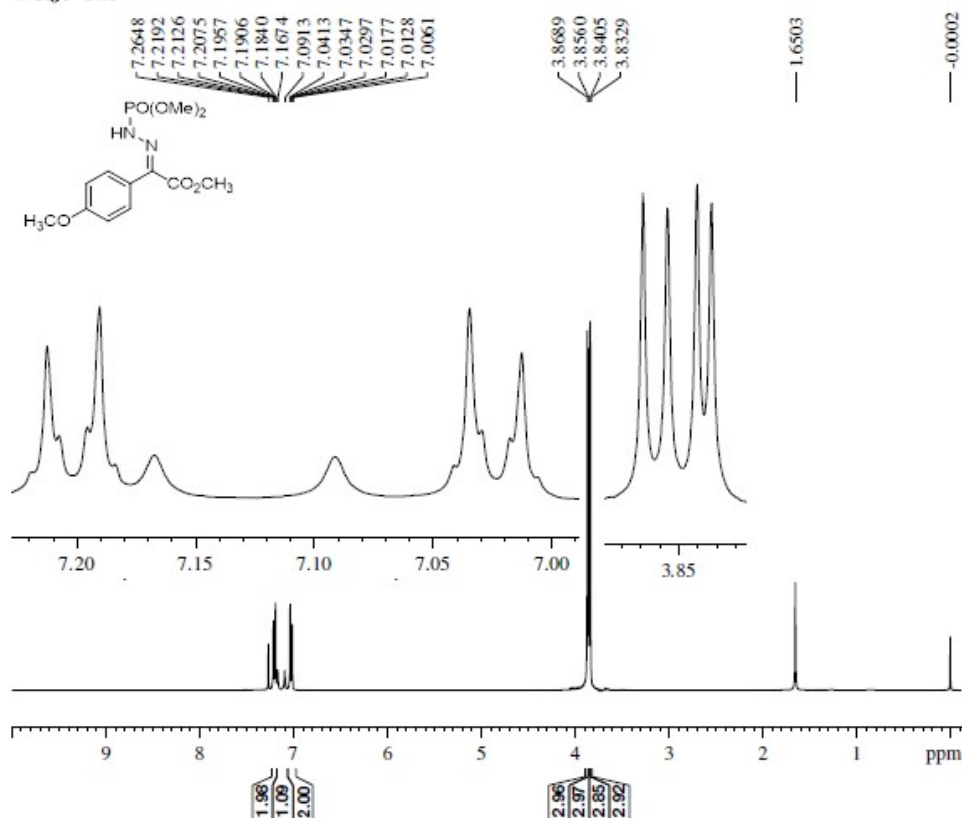

Current Data Parameters  
 NAME 23-Mar-AN-2023  
 EXPNO 540  
 PROCNO 1

F2 - Acquisition Parameters  
 Date\_ 20230323  
 Time 12.38  
 INSTRUM spect  
 PROBHD 5 mm PABBO BB  
 PULPROG zg30  
 TD 65536  
 SOLVENT CDCl3  
 NS 8  
 DS 0  
 SWH 9615.385 Hz  
 FIDRES 0.146719 Hz  
 AQ 3.4078720 sec  
 RG 145.29  
 DW 52.000 usec  
 DE 6.50 usec  
 TE 300.0 K  
 D1 1.00000000 sec  
 TD0 1

==== CHANNEL f1 ====  
 SFO1 400.1629712 MHz  
 NUC1 1H  
 P1 13.20 usec  
 PLW1 13.00000000 W

F2 - Processing parameters  
 SI 65536  
 SF 400.1605078 MHz  
 WDW EM  
 SSB 0  
 LB 0.30 Hz  
 GB 0  
 PC 1.00

Figure S9: <sup>1</sup>H NMR spectrum of 3c

NRJP385

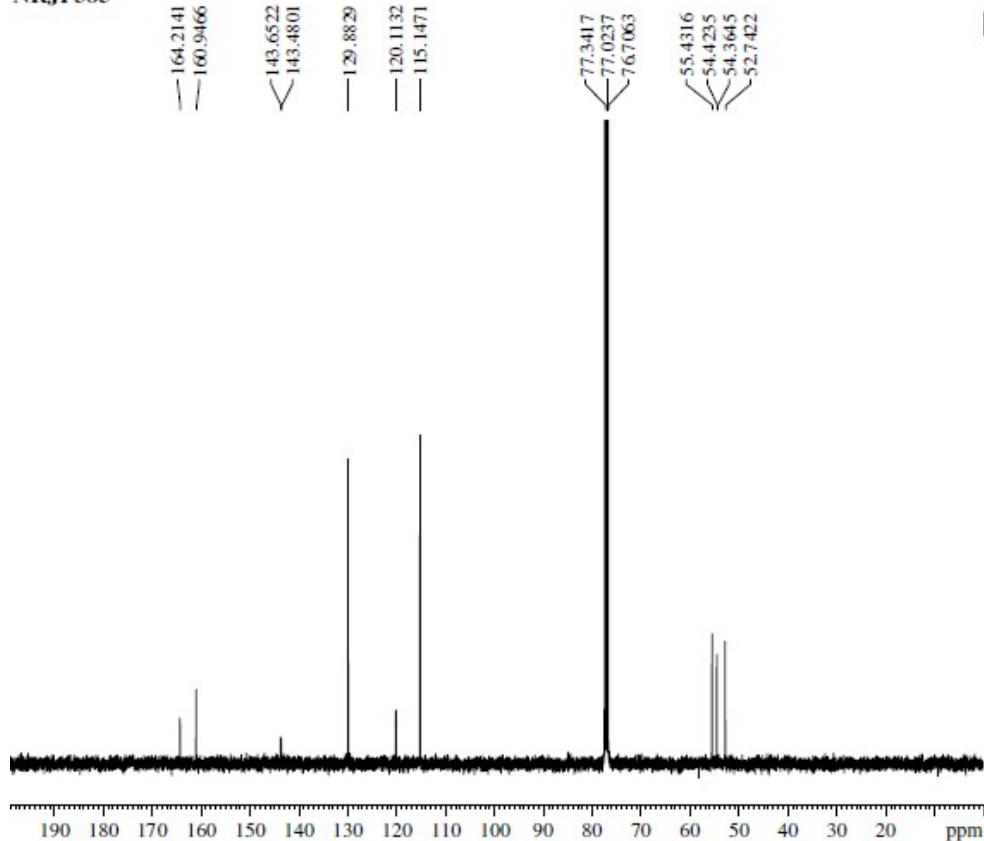

Current Data Parameters  
 NAME 27-MAR-AN-2023  
 EXPNO 400  
 PROCNO 1

F2 - Acquisition Parameters  
 Date\_ 20230328  
 Time 6.39  
 INSTRUM spect  
 PROBHD 5 mm PABBO BB/  
 PULPROG zgpg30  
 TD 65536  
 SOLVENT CDCl3  
 NS 2048  
 DS 0  
 SWH 24038.461 Hz  
 FIDRES 0.366798 Hz  
 AQ 1.3631488 sec  
 RG 201.48  
 DW 20.800 usec  
 DE 6.50 usec  
 TE 300.0 K  
 D1 1.00000000 sec  
 D11 0.03000000 sec  
 TD0 1

==== CHANNEL f1 ====  
 SFO1 100.6304993 MHz  
 NUC1 13C  
 P1 9.90 usec  
 PLW1 53.00000000 W

==== CHANNEL f2 ====  
 SFO2 400.1621006 MHz  
 NUC2 1H  
 CPDPRG2 waltz16  
 PCPD2 90.00 usec  
 PLW2 13.00000000 W  
 PLW12 0.27963999 W  
 PLW13 0.22651000 W

F2 - Processing parameters  
 SI 32768  
 SF 100.6204380 MHz  
 WDW EM  
 SSB 0  
 LB 1.00 Hz  
 GB 0  
 PC 1.40

Figure S10: <sup>13</sup>C{H} NMR spectrum of 3c

NRJP-385

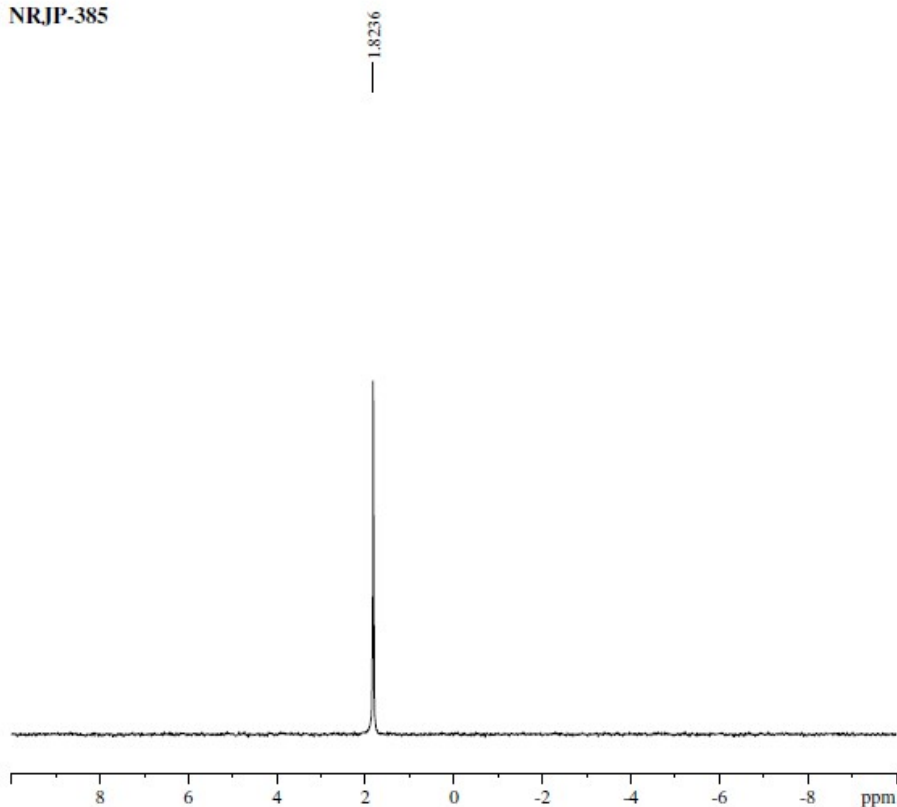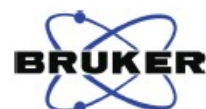

Current Data Parameters  
 NAME 23-Mar-AN-2023  
 EXPNO 550  
 PROCNO 1

F2 - Acquisition Parameters  
 Date\_ 20230323  
 Time 12.39  
 INSTRUM spect  
 PROBHD 5 mm PABBO BB/  
 PULPROG zgpg30  
 TD 65536  
 SOLVENT CDCl3  
 NS 16  
 DS 4  
 SWH 64102.563 Hz  
 FIDRES 0.978127 Hz  
 AQ 0.5111808 sec  
 RG 201.48  
 DW 7.800 usec  
 DE 6.50 usec  
 TE 300.1 K  
 D1 2.0000000 sec  
 D11 0.0300000 sec  
 TDO 1

==== CHANNEL f1 ====  
 SFO1 161.9798402 MHz  
 NUC1 31P  
 P1 15.00 usec  
 PLW1 12.0000000 W

==== CHANNEL f2 ====  
 SFO2 400.1621006 MHz  
 NUC2 1H  
 CPDPRG2 waltz16  
 PCPD2 90.00 usec  
 PLW2 13.0000000 W  
 PLW12 0.27963999 W  
 PLW13 0.22651000 W

F2 - Processing parameters  
 SI 32768  
 SF 161.9879400 MHz  
 WDW EM  
 SSB 0  
 LB 1.00 Hz  
 GB 0  
 PC 1.40

Figure S11:  $^{31}\text{P}\{\text{H}\}$  NMR spectrum of 3c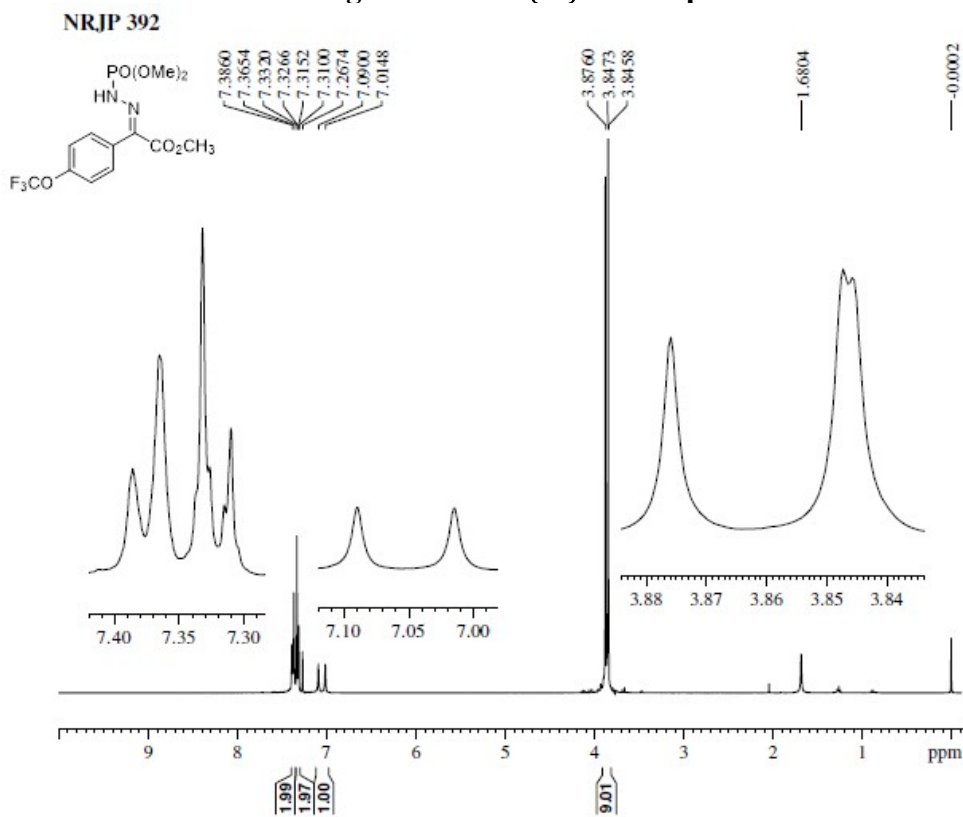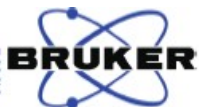

Current Data Parameters  
 NAME 05-APR-AN-2023  
 EXPNO 440  
 PROCNO 1

F2 - Acquisition Parameters  
 Date\_ 20230406  
 Time 1.23  
 INSTRUM spect  
 PROBHD 5 mm PABBO BB/  
 PULPROG zg30  
 TD 65536  
 SOLVENT CDCl3  
 NS 8  
 DS 0  
 SWH 9615.385 Hz  
 FIDRES 0.146719 Hz  
 AQ 3.4078720 sec  
 RG 129.57  
 DW 52.000 usec  
 DE 6.50 usec  
 TE 300.0 K  
 D1 1.0000000 sec  
 TDO 1

==== CHANNEL f1 ====  
 SFO1 400.1629712 MHz  
 NUC1 1H  
 P1 13.20 usec  
 PLW1 13.0000000 W

F2 - Processing parameters  
 SI 65536  
 SF 400.1605068 MHz  
 WDW EM  
 SSB 0  
 LB 0.30 Hz  
 GB 0  
 PC 1.00

Figure S12:  $^1\text{H}$  NMR spectrum of 3d

NRJP 392

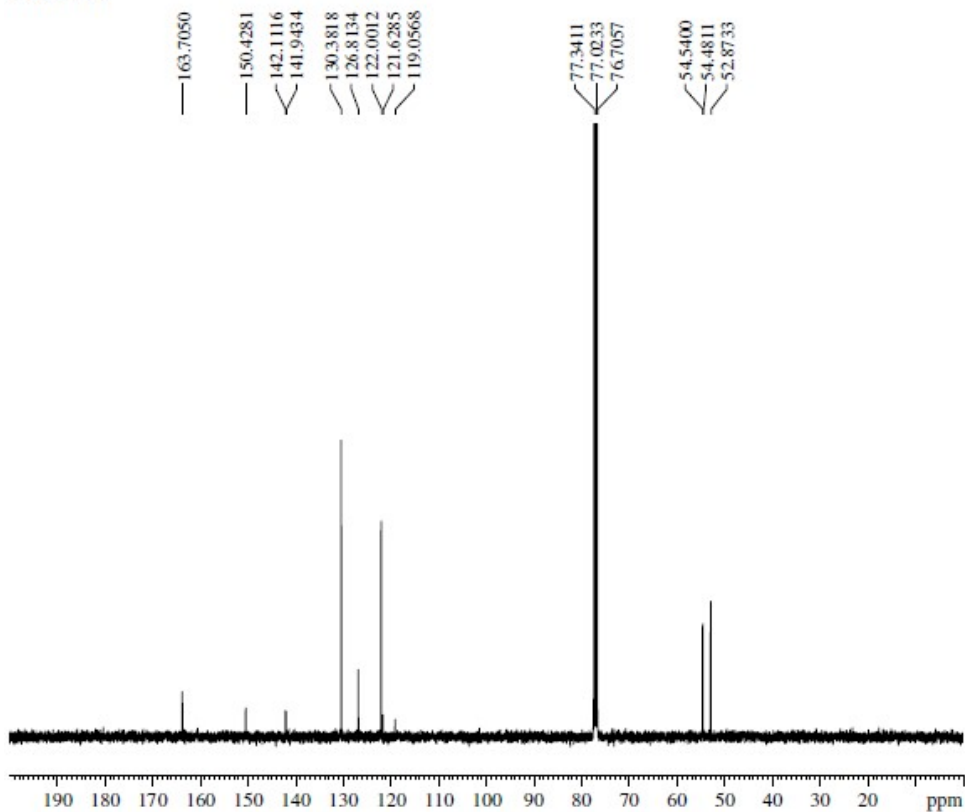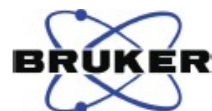

Current Data Parameters  
 NAME 05-APR-AN-2023  
 EXPNO 450  
 PROCNO 1

F2 - Acquisition Parameters  
 Date\_ 20230406  
 Time 1.49  
 INSTRUM spect  
 PROBHD 5 mm PABBO BB/  
 PULPROG zgpg30  
 TD 65536  
 SOLVENT CDCl3  
 NS 2048  
 DS 0  
 SWH 24038.461 Hz  
 FIDRES 0.366798 Hz  
 AQ 1.3631488 sec  
 RG 201.48  
 DW 20.800 usec  
 DE 6.50 usec  
 TE 300.0 K  
 D1 1.0000000 sec  
 D11 0.03000000 sec  
 TDO 1

==== CHANNEL f1 ====  
 SFO1 100.6304993 MHz  
 NUC1 13C  
 P1 9.90 usec  
 PLW1 53.0000000 W

==== CHANNEL f2 ====  
 SFO2 400.1621006 MHz  
 NUC2 1H  
 CPDPRG[2] waltz16  
 PCPD2 90.00 usec  
 PLW2 13.0000000 W  
 PLW12 0.27963999 W  
 PLW13 0.22651000 W

F2 - Processing parameters  
 SI 32768  
 SF 100.6204380 MHz  
 WDW EM  
 SSB 0  
 LB 1.00 Hz  
 GB 0  
 PC 1.40

Figure S13:  $^{13}\text{C}\{\text{H}\}$  NMR spectrum of 3d

NRJP 392

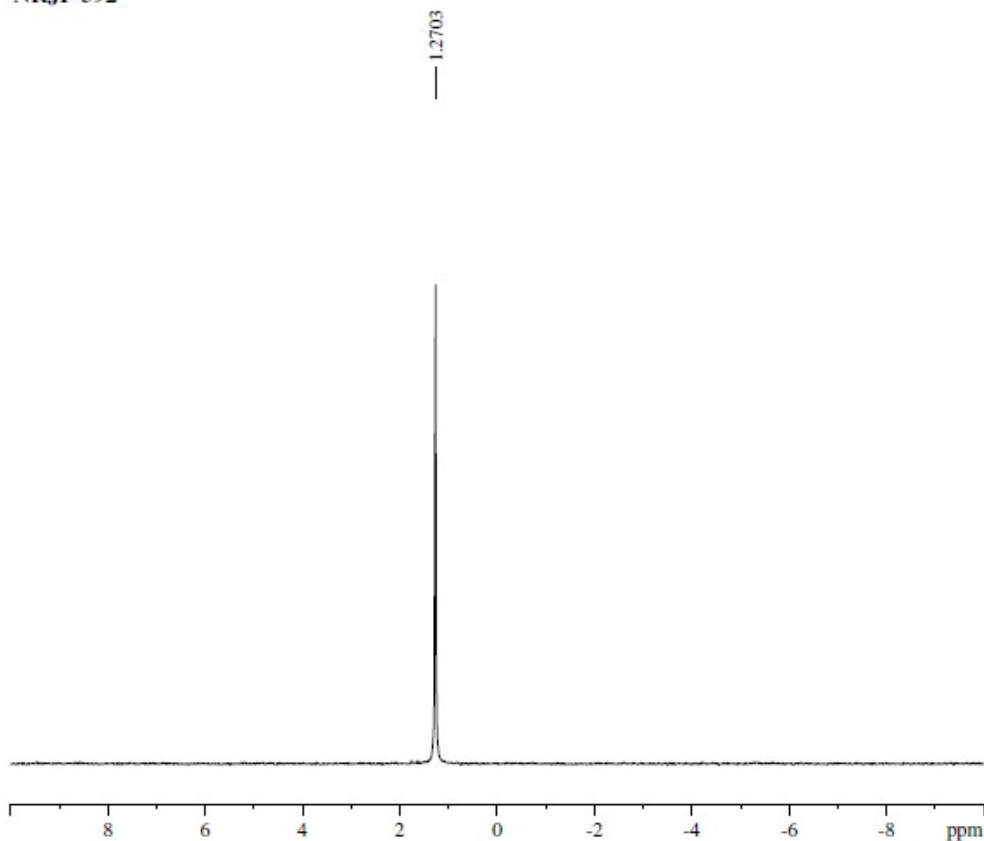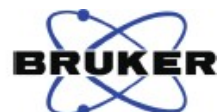

Current Data Parameters  
 NAME 05-APR-AN-2023  
 EXPNO 460  
 PROCNO 1

F2 - Acquisition Parameters  
 Date\_ 20230406  
 Time 1.54  
 INSTRUM spect  
 PROBHD 5 mm PABBO BB/  
 PULPROG zgpg30  
 TD 65536  
 SOLVENT CDCl3  
 NS 16  
 DS 4  
 SWH 64102.563 Hz  
 FIDRES 0.978127 Hz  
 AQ 0.5111808 sec  
 RG 201.48  
 DW 7.800 usec  
 DE 6.50 usec  
 TE 300.1 K  
 D1 2.0000000 sec  
 D11 0.03000000 sec  
 TDO 1

==== CHANNEL f1 ====  
 SFO1 161.9798402 MHz  
 NUC1 31P  
 P1 15.00 usec  
 PLW1 12.0000000 W

==== CHANNEL f2 ====  
 SFO2 400.1621006 MHz  
 NUC2 1H  
 CPDPRG[2] waltz16  
 PCPD2 90.00 usec  
 PLW2 13.0000000 W  
 PLW12 0.27963999 W  
 PLW13 0.22651000 W

F2 - Processing parameters  
 SI 32768  
 SF 161.9879400 MHz  
 WDW EM  
 SSB 0  
 LB 1.00 Hz  
 GB 0  
 PC 1.40

Figure S14:  $^{31}\text{P}\{\text{H}\}$  NMR spectrum of 3d

NRJP-392

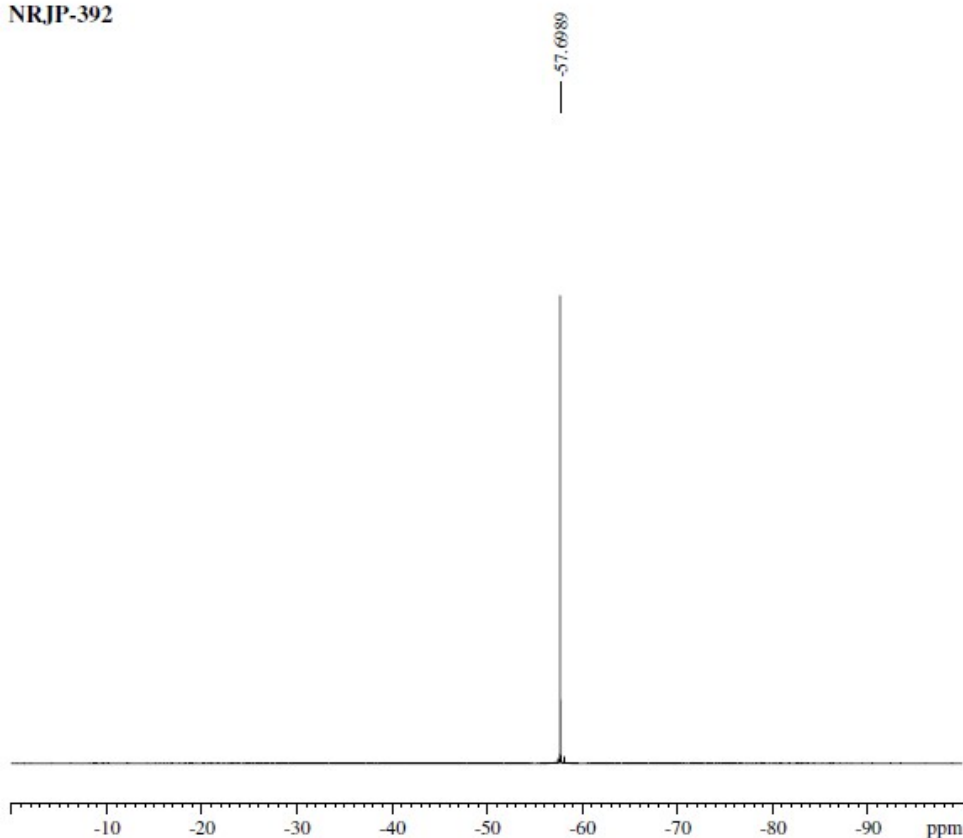Figure S15:  $^{19}\text{F}\{\text{H}\}$  NMR spectrum of 3d

NRJP-391

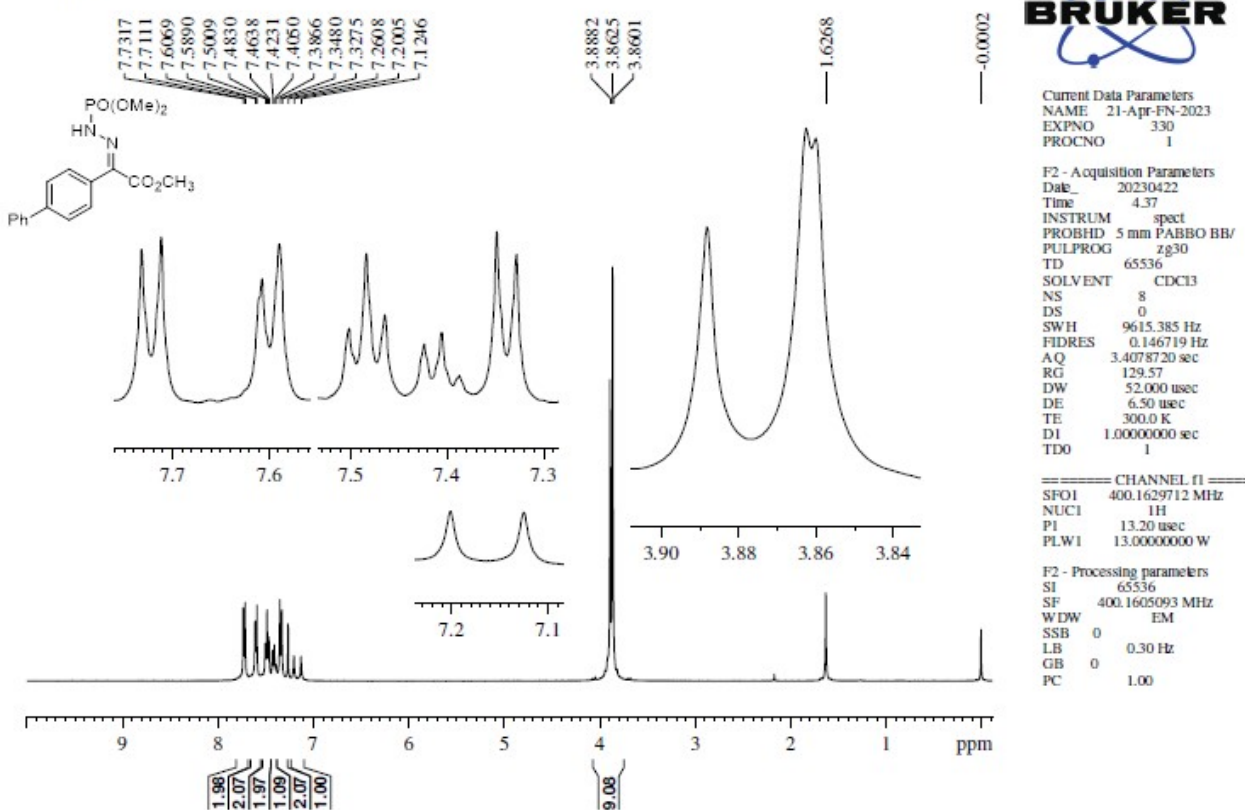Figure S16:  $^1\text{H}$  NMR spectrum of 3e

NRJP 39 1

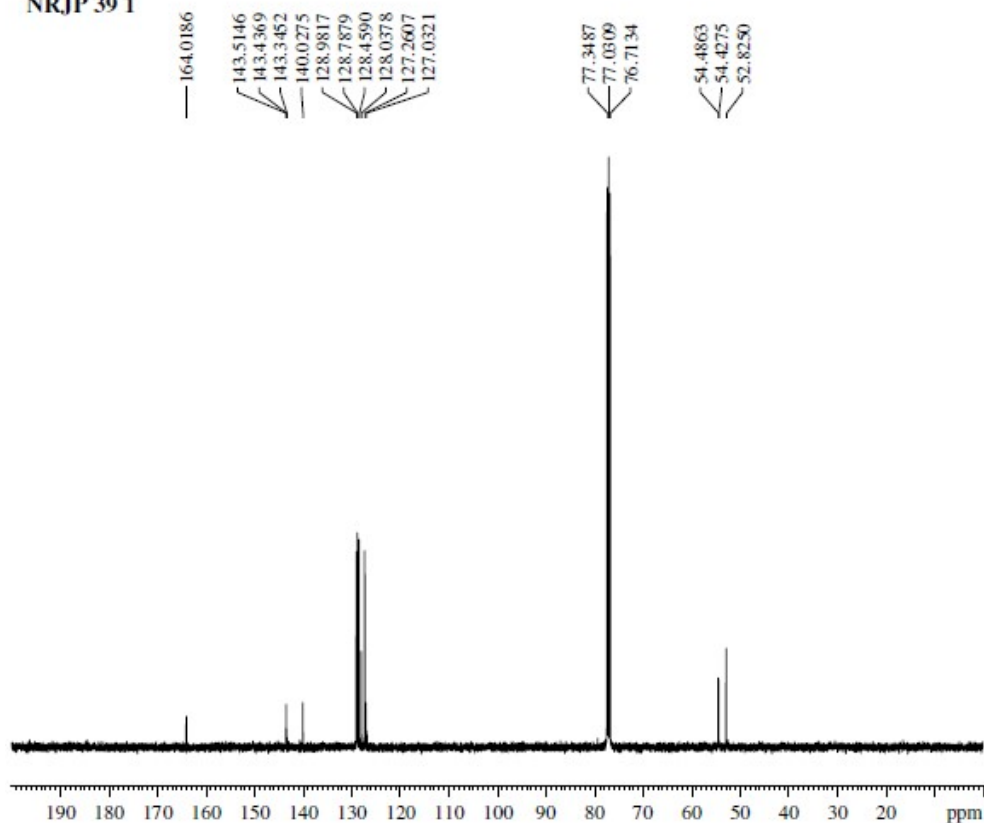

Figure S17:  $^{13}\text{C}\{\text{H}\}$  NMR spectrum of 3e

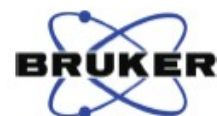

Current Data Parameters  
 NAME 06-Apr-AN-2023  
 EXPNO 360  
 PROCNO 1  
 F2 - Acquisition Parameters  
 Date\_ 20230407  
 Time 12.31  
 INSTRUM spect  
 PROBHD 5 mm PABBO BB  
 PULPROG zgpg30  
 TD 65536  
 SOLVENT CDCl3  
 NS 2048  
 DS 0  
 SWH 24038.461 Hz  
 FIDRES 0.366798 Hz  
 AQ 1.3631488 sec  
 RG 201.48  
 DW 20.800 usec  
 DE 6.50 usec  
 TE 300.0 K  
 D1 1.00000000 sec  
 D11 0.03000000 sec  
 TD0 1

==== CHANNEL f1 =====  
 SFO1 100.6304993 MHz  
 NUC1  $^{13}\text{C}$   
 P1 9.90 usec  
 PLW1 53.00000000 W

==== CHANNEL f2 =====  
 SFO2 400.1621006 MHz  
 NUC2  $^1\text{H}$   
 CPDPRG2 waltz16  
 PCPD2 90.00 usec  
 PLW2 13.00000000 W  
 PLW12 0.27963999 W  
 PLW13 0.22651000 W

F2 - Processing parameters  
 SI 32768  
 SF 100.6204380 MHz  
 WDW EM  
 SSB 0  
 LB 1.00 Hz  
 GB 0  
 PC 1.40

NRJP-391

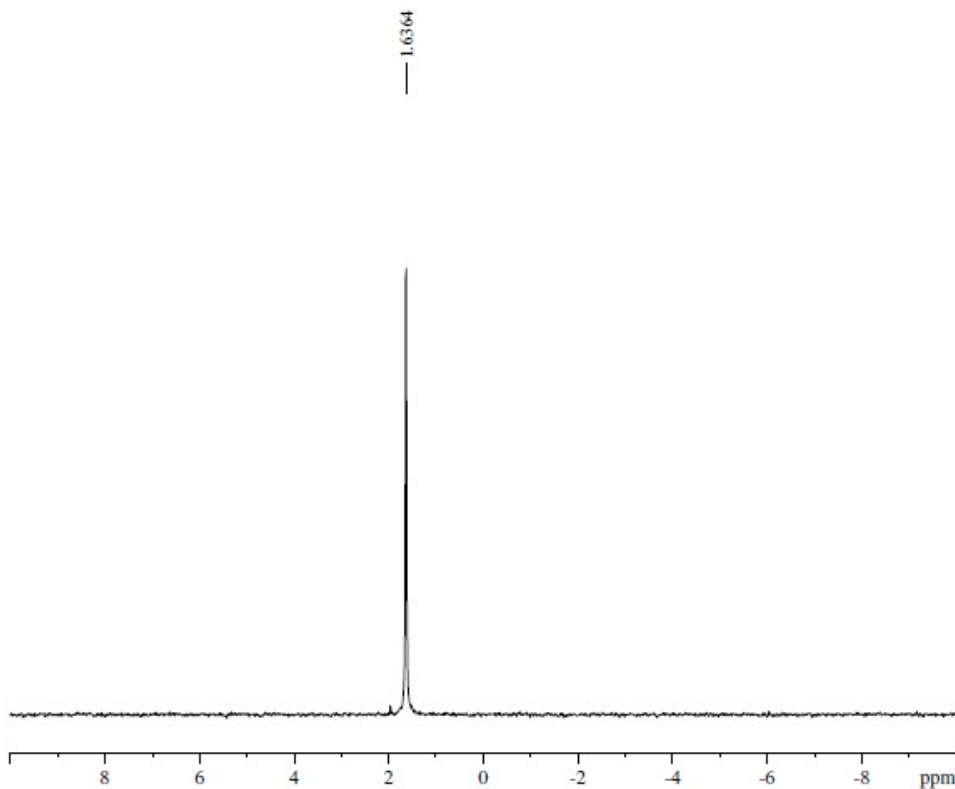

Figure S18:  $^{31}\text{P}\{\text{H}\}$  NMR spectrum of 3e

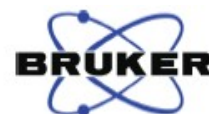

Current Data Parameters  
 NAME 25-Apr-FN-2023  
 EXPNO 410  
 PROCNO 1

F2 - Acquisition Parameters  
 Date\_ 20230425  
 Time 11.33  
 INSTRUM spect  
 PROBHD 5 mm PABBO BB  
 PULPROG zgpg30  
 TD 65536  
 SOLVENT CDCl3  
 NS 16  
 DS 4  
 SWH 64102.563 Hz  
 FIDRES 0.978127 Hz  
 AQ 0.5111808 sec  
 RG 201.48  
 DW 7.800 usec  
 DE 6.50 usec  
 TE 300.1 K  
 D1 2.00000000 sec  
 D11 0.03000000 sec  
 TD0 1

==== CHANNEL f1 =====  
 SFO1 161.9798402 MHz  
 NUC1  $^{31}\text{P}$   
 P1 15.00 usec  
 PLW1 12.00000000 W

==== CHANNEL f2 =====  
 SFO2 400.1621006 MHz  
 NUC2  $^1\text{H}$   
 CPDPRG2 waltz16  
 PCPD2 90.00 usec  
 PLW2 13.00000000 W  
 PLW12 0.27963999 W  
 PLW13 0.22651000 W

F2 - Processing parameters  
 SI 32768  
 SF 161.9879400 MHz  
 WDW EM  
 SSB 0  
 LB 1.00 Hz  
 GB 0  
 PC 1.40

NRJP 397

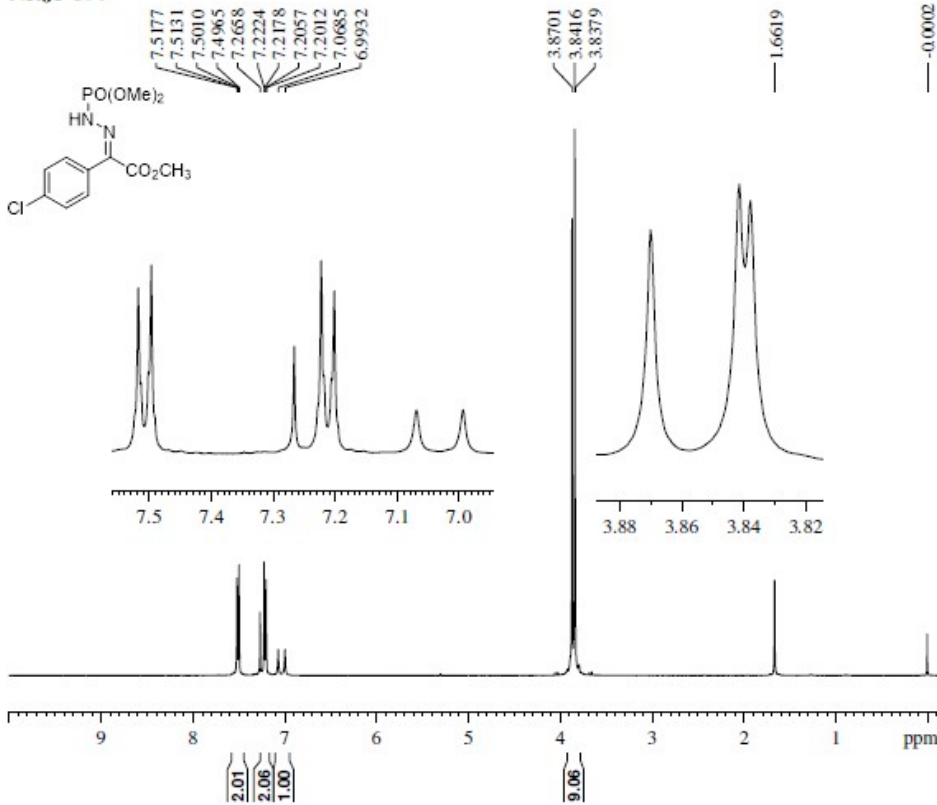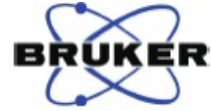

Current Data Parameters  
 NAME 18-Apr-AN-2023  
 EXPNO 450  
 PROCNO 1

F2 - Acquisition Parameters  
 Date\_ 20230419  
 Time 9.24  
 INSTRUM spect  
 PROBHD 5 mm PABBO BB/  
 PULPROG zg30  
 TD 65536  
 SOLVENT CDCl3  
 NS 8  
 DS 0  
 SWH 9615.385 Hz  
 FIDRES 0.146719 Hz  
 A Q 3.4078720 sec  
 RG 145.29  
 DW 52.000 usec  
 DE 6.50 usec  
 TE 300.0 K  
 D1 1.0000000 sec  
 TDO 1

==== CHANNEL f1 ====  
 SFO1 400.1629712 MHz  
 NUC1 1H  
 P1 13.20 usec  
 PLW1 13.00000000 W

F2 - Processing parameters  
 SI 65536  
 SF 400.1605073 MHz  
 WDW EM  
 SSB 0  
 LB 0.30 Hz  
 GB 0  
 PC 1.00

Figure S19: <sup>1</sup>H NMR spectrum of 3f

NRJP 397

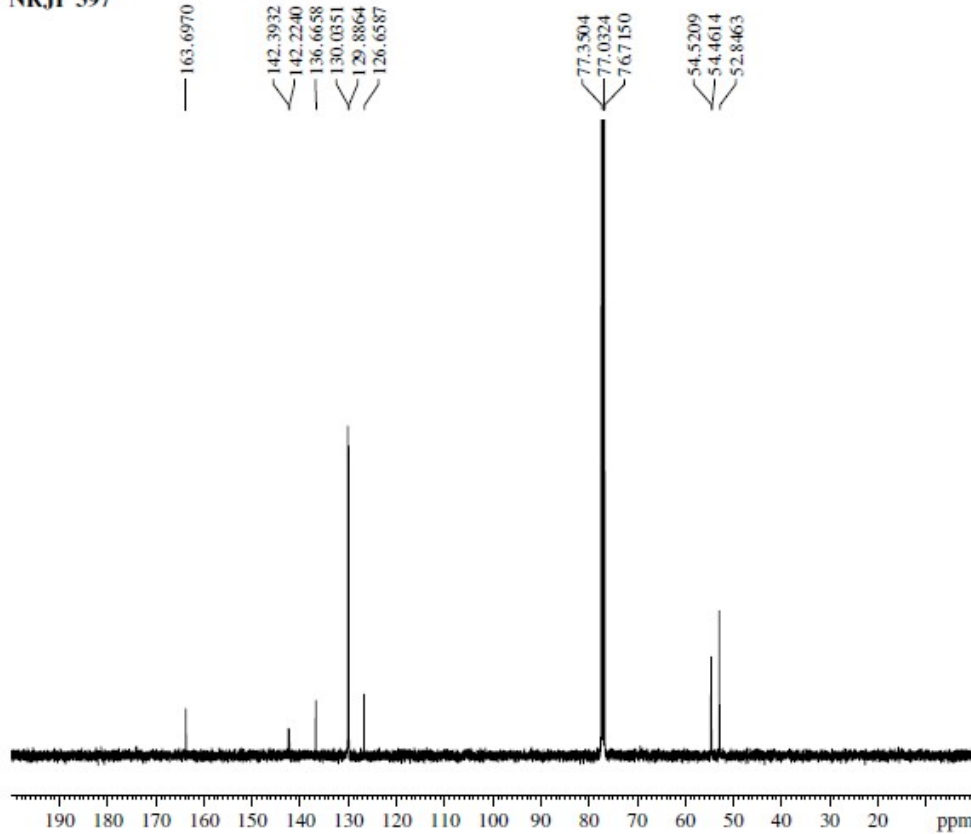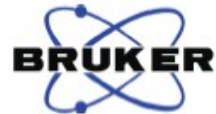

Current Data Parameters  
 NAME 18-Apr-AN-2023  
 EXPNO 470  
 PROCNO 1

F2 - Acquisition Parameters  
 Date\_ 20230419  
 Time 2.11  
 INSTRUM spect  
 PROBHD 5 mm PABBO BB/  
 PULPROG zgpg30  
 TD 65536  
 SOLVENT CDCl3  
 NS 2048  
 DS 0  
 SWH 24038.461 Hz  
 FIDRES 0.366798 Hz  
 A Q 1.3631488 sec  
 RG 201.48  
 DW 20.800 usec  
 DE 6.50 usec  
 TE 300.0 K  
 D1 1.0000000 sec  
 D11 0.03000000 sec  
 TDO 1

==== CHANNEL f1 ====  
 SFO1 100.6304993 MHz  
 NUC1 13C  
 P1 9.90 usec  
 PLW1 53.00000000 W

==== CHANNEL f2 ====  
 SFO2 400.1621006 MHz  
 NUC2 1H  
 CPDPRG2 waltz16  
 PCPD2 90.00 usec  
 PLW2 13.00000000 W  
 PLW12 0.27963999 W  
 PLW13 0.22651000 W

F2 - Processing parameters  
 SI 32768  
 SF 100.6204380 MHz  
 WDW EM  
 SSB 0  
 LB 1.00 Hz  
 GB 0  
 PC 1.40

Figure S20: <sup>13</sup>C{<sup>1</sup>H} NMR spectrum of 3f



NRJP 397

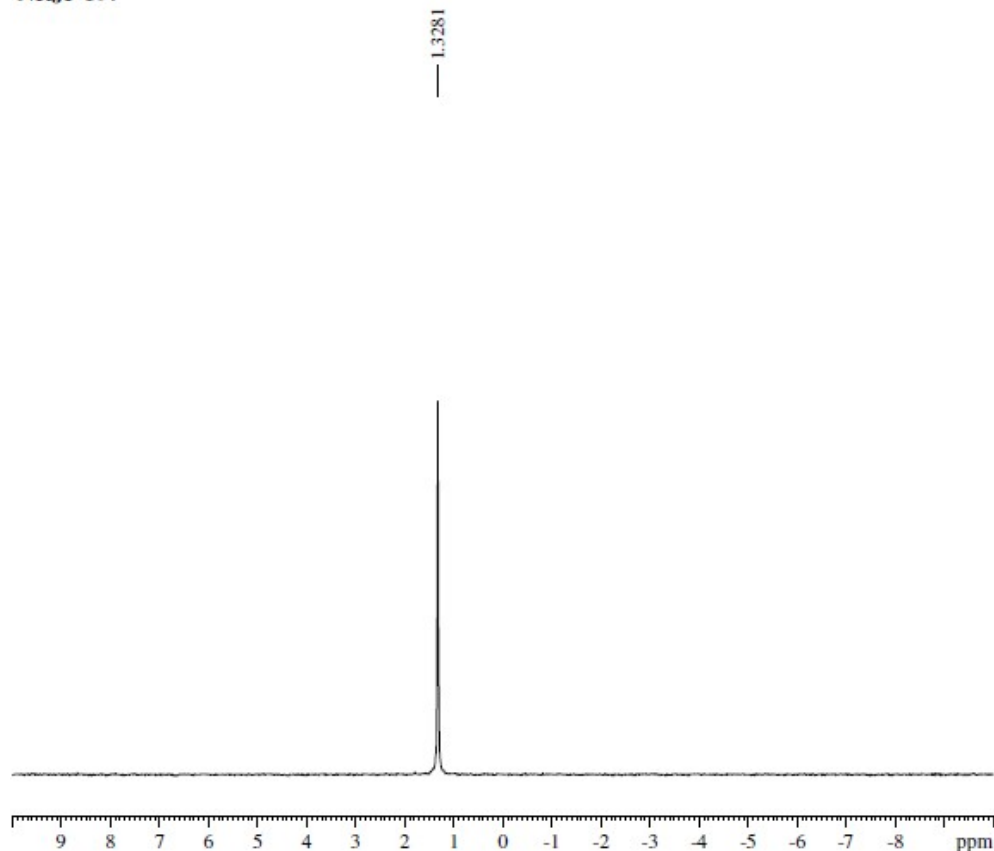Figure S21:  $^{31}\text{P}\{\text{H}\}$  NMR spectrum of 3f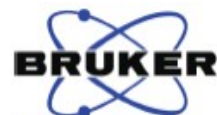

Current Data Parameters  
 NAME 18-Apr-AN-2023  
 EXPNO 460  
 PROCNO 1

F2 - Acquisition Parameters  
 Date\_ 20230419  
 Time 9.26  
 INSTRUM spect  
 PROBHD 5 mm PABBO BB/  
 PULPROG zgpg30  
 TD 65536  
 SOLVENT CDCl3  
 NS 16  
 DS 4  
 SWH 64102.563 Hz  
 FIDRES 0.978127 Hz  
 AQ 0.5111808 sec  
 RG 201.48  
 DW 7.800 usec  
 DE 6.50 usec  
 TE 300.1 K  
 D1 2.0000000 sec  
 D11 0.0300000 sec  
 TD0 1

==== CHANNEL f1 ====  
 SFO1 161.9798402 MHz  
 NUC1  $^{31}\text{P}$   
 P1 15.00 usec  
 PLW1 12.0000000 W

==== CHANNEL f2 ====  
 SFO2 400.1621006 MHz  
 NUC2  $^1\text{H}$   
 CPDPRG[2] waltz16  
 PCPD2 90.00 usec  
 PLW2 13.0000000 W  
 PLW12 0.27963999 W  
 PLW13 0.22651000 W

F2 - Processing parameters  
 SI 32768  
 SF 161.9879400 MHz  
 WDW EM  
 SSB 0  
 LB 1.00 Hz  
 GB 0  
 PC 1.40

NRJP-398

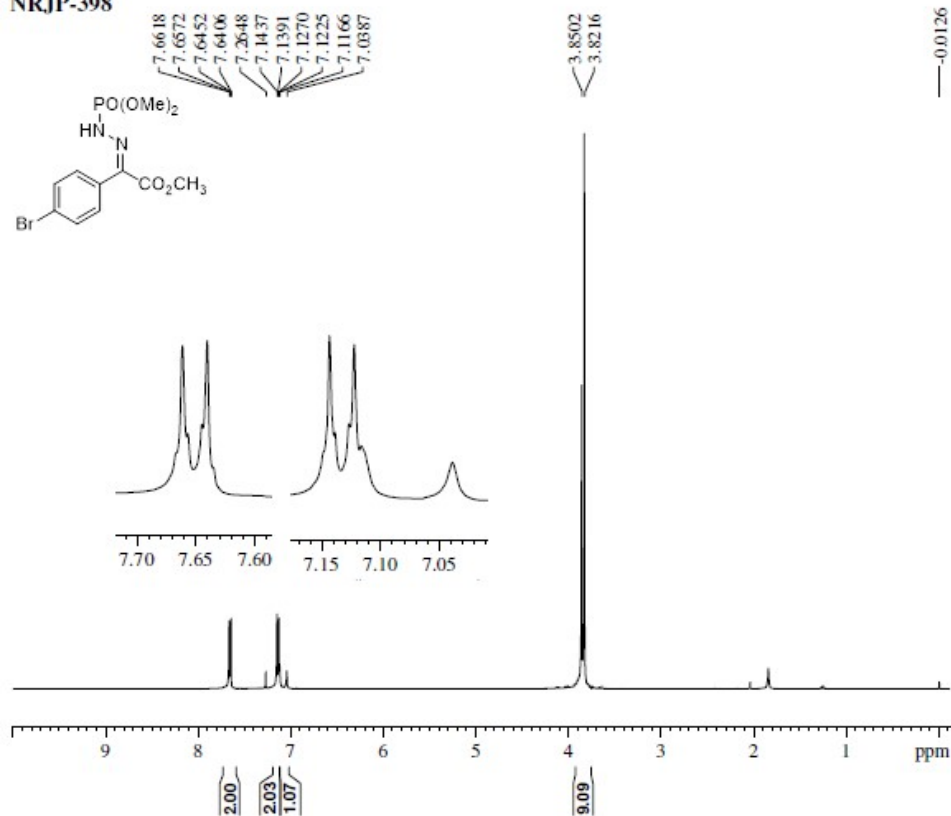Figure S22:  $^1\text{H}$  NMR spectrum of 3g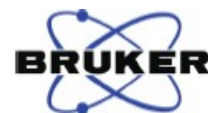

Current Data Parameters  
 NAME 14-JUL-AN-2023  
 EXPNO 430  
 PROCNO 1

F2 - Acquisition Parameters  
 Date\_ 20230715  
 Time 11.26  
 INSTRUM spect  
 PROBHD 5 mm PABBO BB/  
 PULPROG zg30  
 TD 65536  
 SOLVENT CDCl3  
 NS 8  
 DS 0  
 SWH 9615.385 Hz  
 FIDRES 0.146719 Hz  
 AQ 3.4078720 sec  
 RG 89.7  
 DW 52.000 usec  
 DE 6.50 usec  
 TE 300.0 K  
 D1 1.0000000 sec  
 TD0 1

==== CHANNEL f1 ====  
 SFO1 400.1629712 MHz  
 NUC1  $^1\text{H}$   
 P1 13.20 usec  
 PLW1 13.0000000 W

F2 - Processing parameters  
 SI 65536  
 SF 400.1605077 MHz  
 WDW EM  
 SSB 0  
 LB 0.30 Hz  
 GB 0  
 PC 1.00

NRJP 398

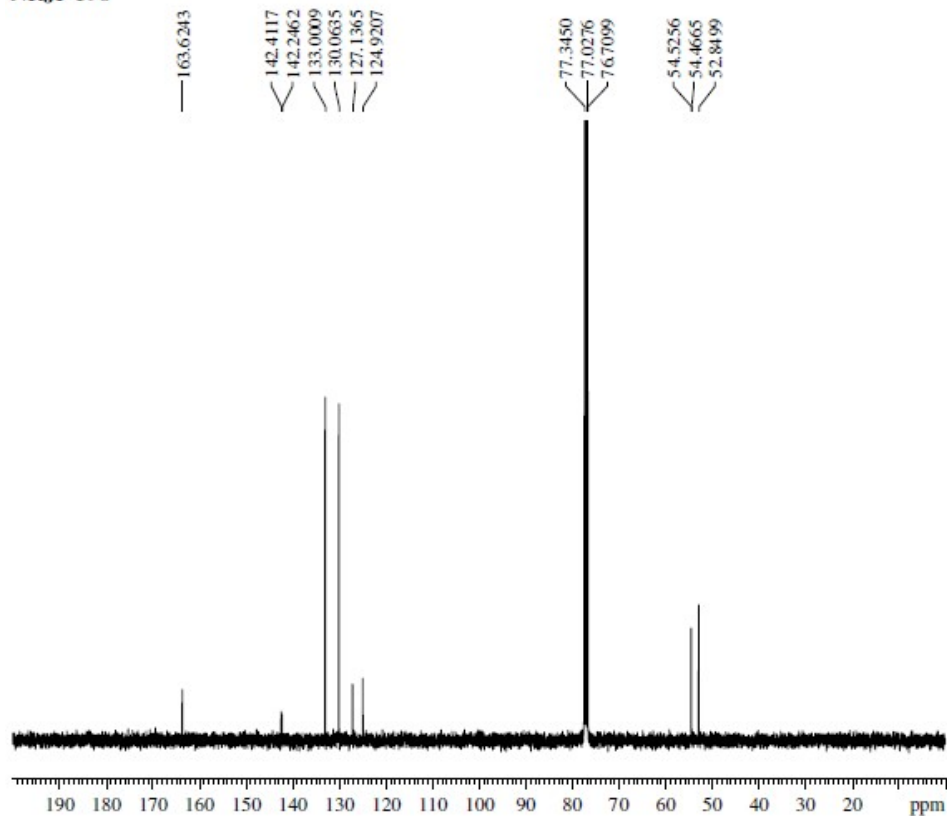Figure S23:  $^{13}\text{C}\{\text{H}\}$  NMR spectrum of 3g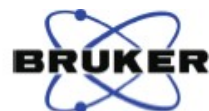

Current Data Parameters  
NAME 17-Apr-AN-2023  
EXPNO 390  
PROCNO 1

F2 - Acquisition Parameters  
Date\_ 20230418  
Time 0.43  
INSTRUM spect  
PROBHD 5 mm PABBO BB/  
PULPROG zgpg30  
TD 65536  
SOLVENT CDCl3  
NS 2048  
DS 0  
SWH 24038.461 Hz  
FIDRES 0.366798 Hz  
AQ 1.3631488 sec  
RG 201.48  
DW 20.800 usec  
DE 6.50 usec  
TE 300.0 K  
D1 1.0000000 sec  
D11 0.0300000 sec  
TDO 1

==== CHANNEL f1 ====  
SFO1 100.6304993 MHz  
NUC1 13C  
P1 9.90 usec  
PLW1 53.0000000 W

==== CHANNEL f2 ====  
SFO2 400.1621006 MHz  
NUC2 1H  
CPDPRG2 waltz16  
PCPD2 90.00 usec  
PLW2 13.0000000 W  
PLW12 0.27963999 W  
PLW13 0.22651000 W

F2 - Processing parameters  
SI 32768  
SF 100.6204380 MHz  
WDW EM  
SSB 0  
LB 1.00 Hz  
GB 0  
PC 1.40

NRJP 398

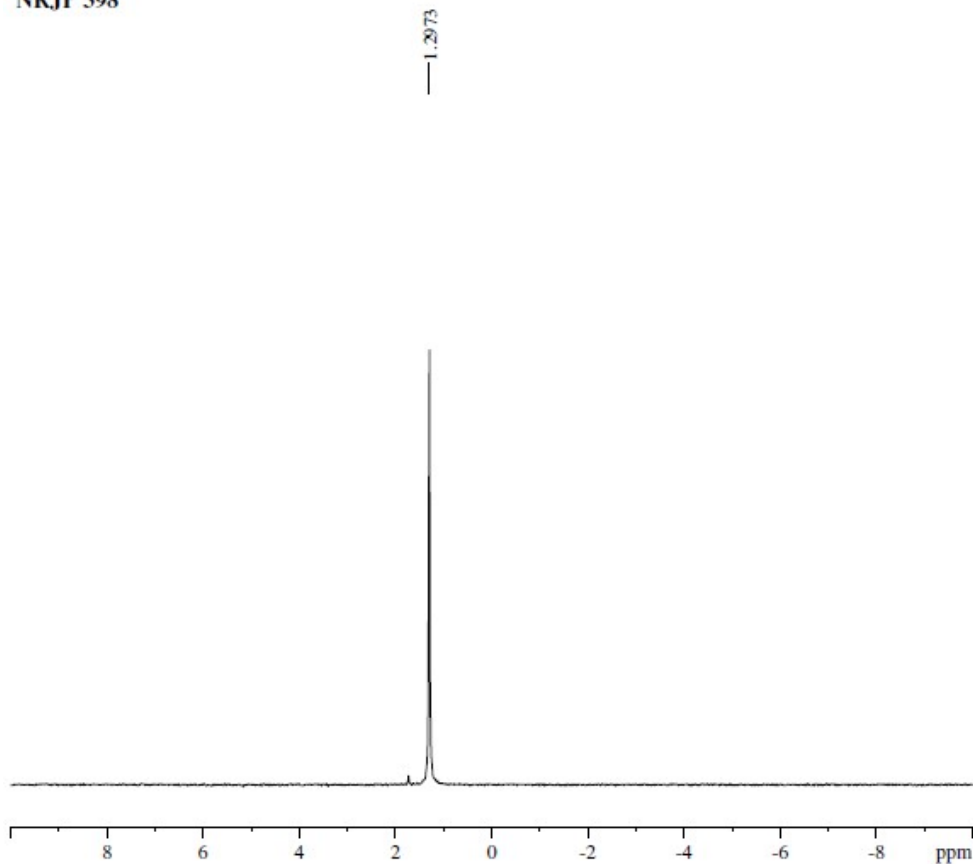Figure S24:  $^{31}\text{P}\{\text{H}\}$  NMR spectrum of 3g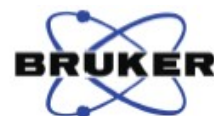

Current Data Parameters  
NAME 17-Apr-AN-2023  
EXPNO 380  
PROCNO 1

F2 - Acquisition Parameters  
Date\_ 20230418  
Time 0.22  
INSTRUM spect  
PROBHD 5 mm PABBO BB/  
PULPROG zgpg30  
TD 65536  
SOLVENT CDCl3  
NS 16  
DS 4  
SWH 64102.563 Hz  
FIDRES 0.978127 Hz  
AQ 0.5111808 sec  
RG 201.48  
DW 7.800 usec  
DE 6.50 usec  
TE 300.1 K  
D1 2.0000000 sec  
D11 0.0300000 sec  
TDO 1

==== CHANNEL f1 ====  
SFO1 161.9798402 MHz  
NUC1 31P  
P1 15.00 usec  
PLW1 12.0000000 W

==== CHANNEL f2 ====  
SFO2 400.1621006 MHz  
NUC2 1H  
CPDPRG2 waltz16  
PCPD2 90.00 usec  
PLW2 13.0000000 W  
PLW12 0.27963999 W  
PLW13 0.22651000 W

F2 - Processing parameters  
SI 32768  
SF 161.9879400 MHz  
WDW EM  
SSB 0  
LB 1.00 Hz  
GB 0  
PC 1.40

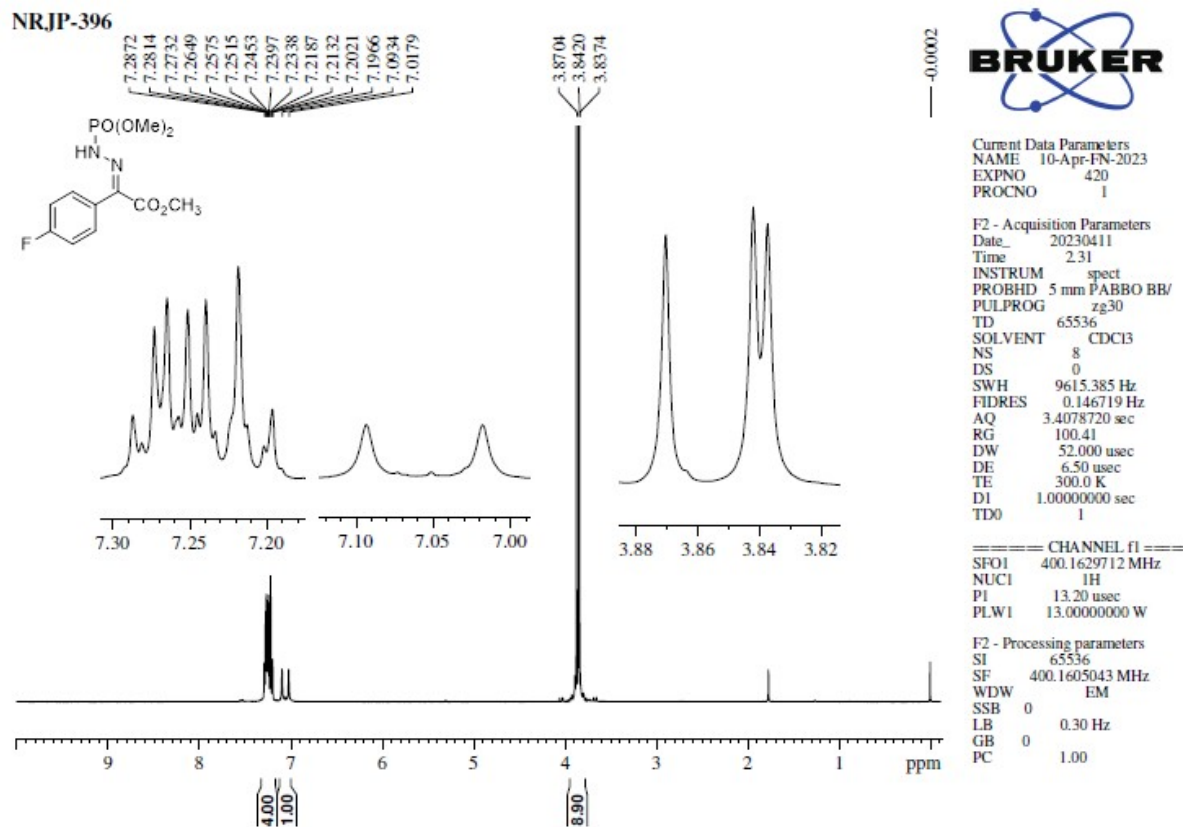

Figure S25:  $^1\text{H}$  NMR spectrum of 3h

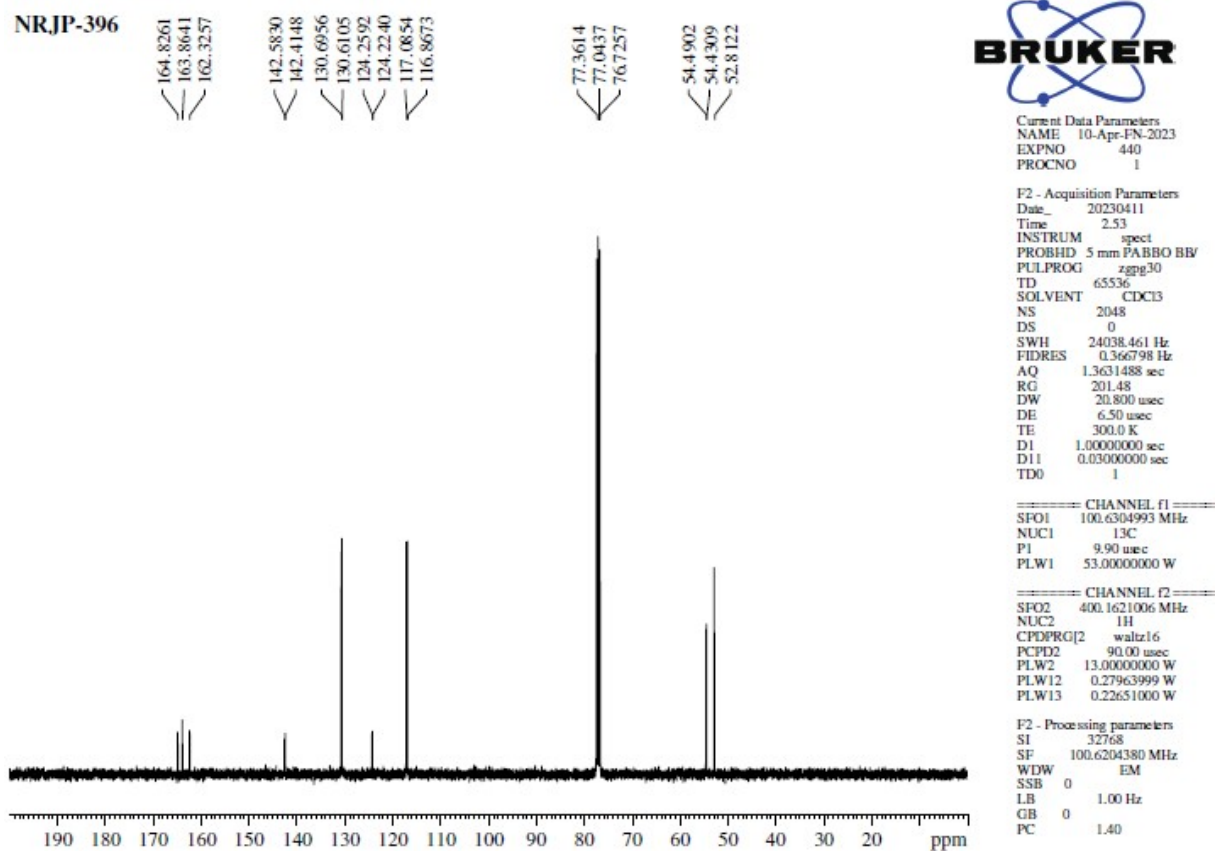

Figure S26:  $^{13}\text{C}\{^1\text{H}\}$  NMR spectrum of 3h

NRJP-396

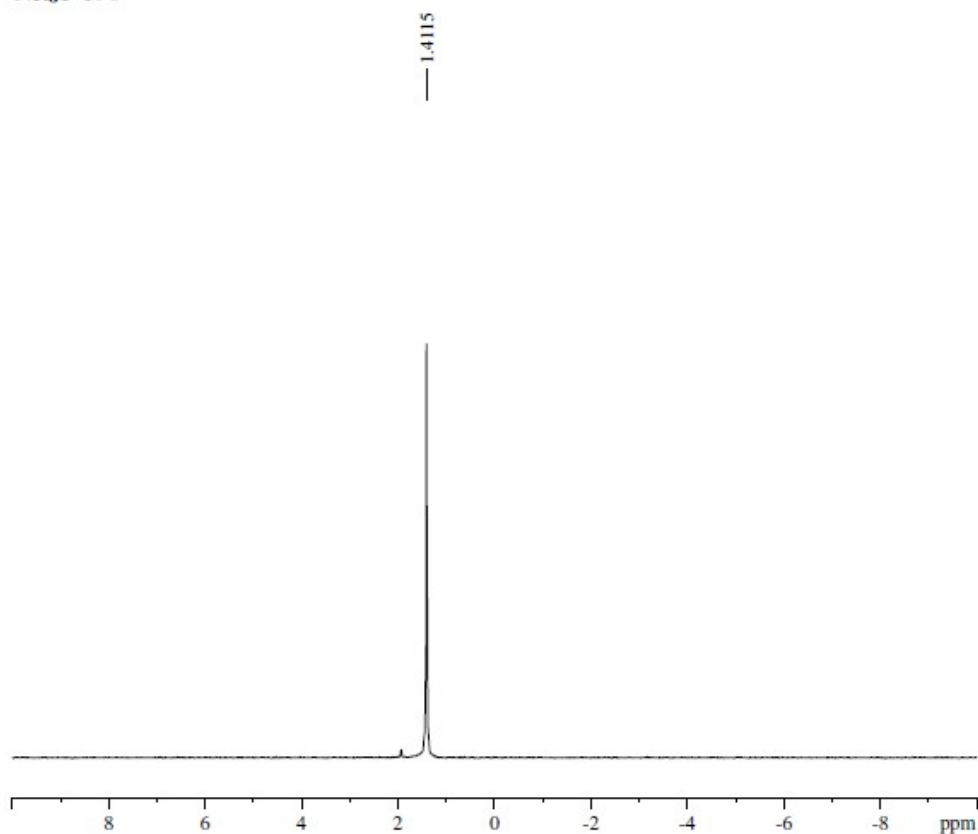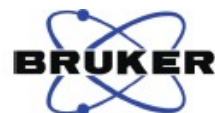

Current Data Parameters  
NAME 10-Apr-FN-2023  
EXPNO 430  
PROCNO 1

F2 - Acquisition Parameters  
Date\_ 20230411  
Time 2.33  
INSTRUM spect  
PROBHD 5 mm PABBO BB/  
PULPROG zgpg30  
TD 65536  
SOLVENT CDCl3  
NS 16  
DS 4  
SWH 64102.563 Hz  
FIDRES 0.978127 Hz  
AQ 0.5111808 sec  
RG 201.48  
DW 7.800 usec  
DE 6.50 usec  
TE 300.1 K  
D1 2.0000000 sec  
D11 0.03000000 sec  
TD0 1

==== CHANNEL f1 ====  
SFO1 161.9798402 MHz  
NUC1  $^{31}\text{P}$   
P1 15.00 usec  
PLW1 12.0000000 W

==== CHANNEL f2 ====  
SFO2 400.1621006 MHz  
NUC2  $^1\text{H}$   
CPDPRG[2] waltz16  
PCPD2 90.00 usec  
PLW2 13.0000000 W  
PLW12 0.27963999 W  
PLW13 0.22651000 W

F2 - Processing parameters  
SI 32768  
SF 161.9879400 MHz  
WDW EM  
SSB 0  
LB 1.00 Hz  
GB 0  
PC 1.40

Figure S27:  $^{31}\text{P}\{\text{H}\}$  NMR spectrum of 3h

NRJP-396

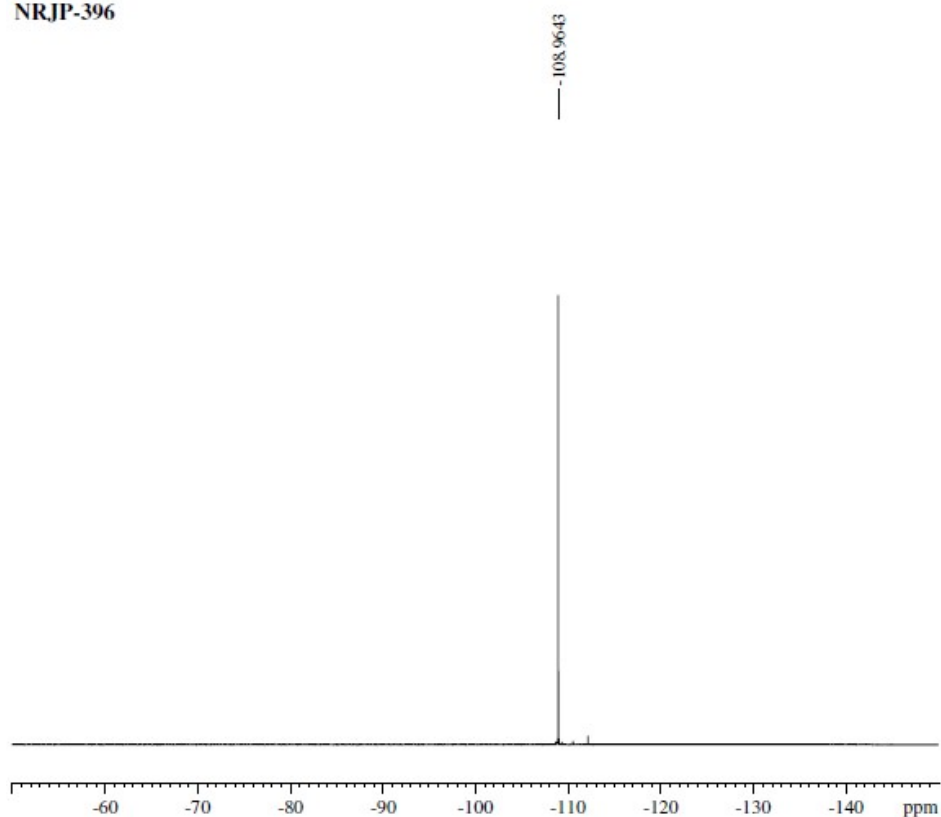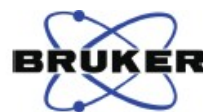

Current Data Parameters  
NAME 02-May-AN-2023  
EXPNO 500  
PROCNO 1

F2 - Acquisition Parameters  
Date\_ 20230503  
Time 0.43  
INSTRUM spect  
PROBHD 5 mm PABBO BB/  
PULPROG zg/hzgcn.2  
TD 131072  
SOLVENT CDCl3  
NS 16  
DS 4  
SWH 89285.711 Hz  
FIDRES 0.681196 Hz  
AQ 0.7340032 sec  
RG 201.48  
DW 5.600 usec  
DE 6.50 usec  
TE 300.1 K  
D1 1.0000000 sec  
D11 0.03000000 sec  
D12 0.00002000 sec  
TD0 1

==== CHANNEL f1 ====  
SFO1 376.4894122 MHz  
NUC1  $^{19}\text{F}$   
P1 15.00 usec  
PLW1 21.0000000 W

==== CHANNEL f2 ====  
SFO2 400.1621006 MHz  
NUC2  $^1\text{H}$   
CPDPRG[2] waltz16  
PCPD2 90.00 usec  
PLW2 13.0000000 W  
PLW12 0.27963999 W

F2 - Processing parameters  
SI 65536  
SF 376.5270650 MHz  
WDW EM  
SSB 0  
LB 0.30 Hz  
GB 0  
PC 1.00

Figure S28:  $^{19}\text{F}\{\text{H}\}$  NMR spectrum of 3h

NRJP383

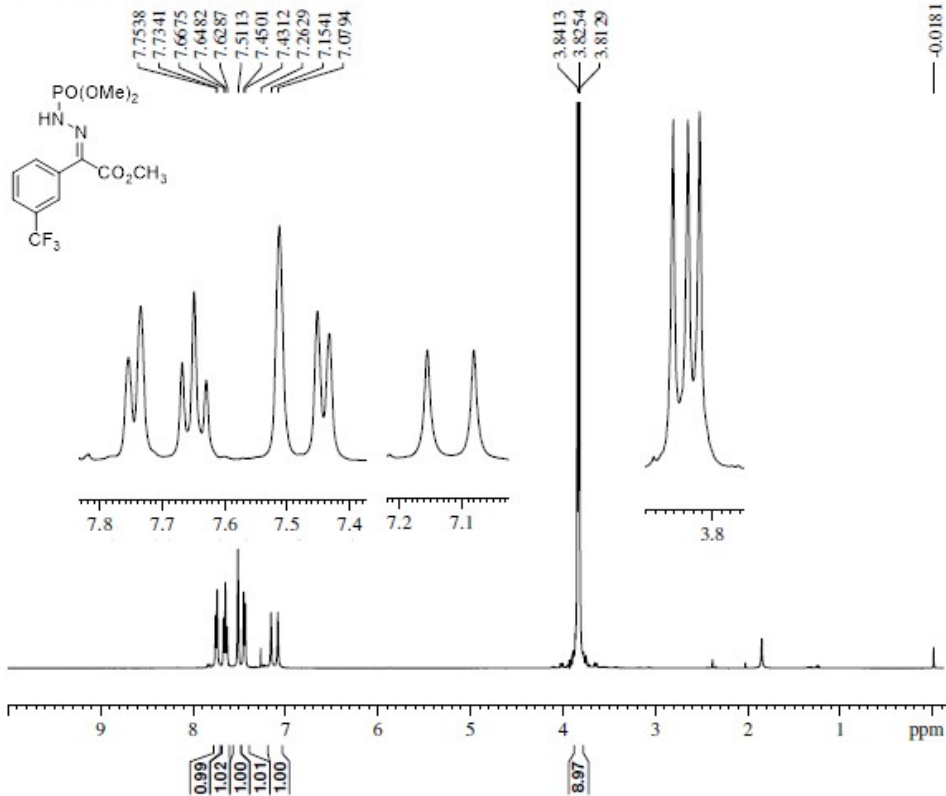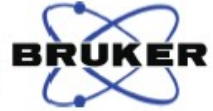

Current Data Parameters  
 NAME 24-MAR-AN-2023  
 EXPNO 330  
 PROCNO 1

F2 - Acquisition Parameters  
 Date\_ 20230325  
 Time 5.02  
 INSTRUM spect  
 PROBHD 5 mm PABBO BB/  
 PULPROG zg30  
 TD 65536  
 SOLVENT CDCl3  
 NS 8  
 DS 0  
 SWH 9615.385 Hz  
 FIDRES 0.146719 Hz  
 AQ 3.4078720 sec  
 RG 80.54  
 DW 52.000 usec  
 DE 6.50 usec  
 TE 300.0 K  
 D1 1.00000000 sec  
 TDO 1

==== CHANNEL f1 ====  
 SFO1 400.1629712 MHz  
 NUC1 1H  
 P1 13.20 usec  
 PLW1 13.00000000 W

F2 - Processing parameters  
 SI 65536  
 SF 400.1605085 MHz  
 WDW EM  
 SSB 0  
 LB 0.30 Hz  
 GB 0  
 PC 1.00

Figure S29: <sup>1</sup>H NMR spectrum of 3i

NRJP-383

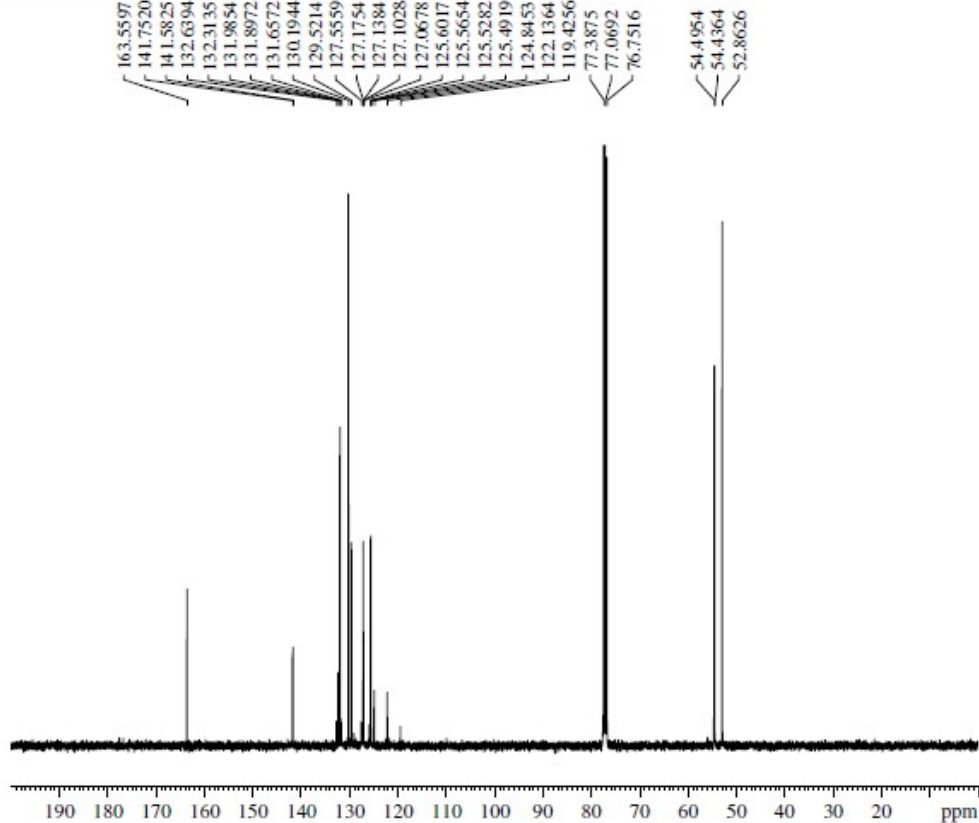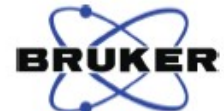

Current Data Parameters  
 NAME 29-Mar-AN-2023  
 EXPNO 420  
 PROCNO 1

F2 - Acquisition Parameters  
 Date\_ 20230330  
 Time 6.01  
 INSTRUM spect  
 PROBHD 5 mm PABBO BB/  
 PULPROG zgpg30  
 TD 65536  
 SOLVENT CDCl3  
 NS 2048  
 DS 0  
 SWH 24038.461 Hz  
 FIDRES 0.366798 Hz  
 AQ 1.3631488 sec  
 RG 201.48  
 DW 20.800 usec  
 DE 6.50 usec  
 TE 300.0 K  
 D1 1.00000000 sec  
 D11 0.03000000 sec  
 TDO 1

==== CHANNEL f1 ====  
 SFO1 100.6304993 MHz  
 NUC1 13C  
 P1 9.90 usec  
 PLW1 53.00000000 W

==== CHANNEL f2 ====  
 SFO2 400.1621006 MHz  
 NUC2 1H  
 CPDPRG[2] waltz16  
 PCPD2 90.00 usec  
 PLW2 13.00000000 W  
 PLW12 0.27963999 W  
 PLW13 0.22651000 W

F2 - Processing parameters  
 SI 32768  
 SF 100.6204380 MHz  
 WDW EM  
 SSB 0  
 LB 1.00 Hz  
 GB 0  
 PC 1.40

Figure S30: <sup>13</sup>C{H} NMR spectrum of 3i

NRJP383

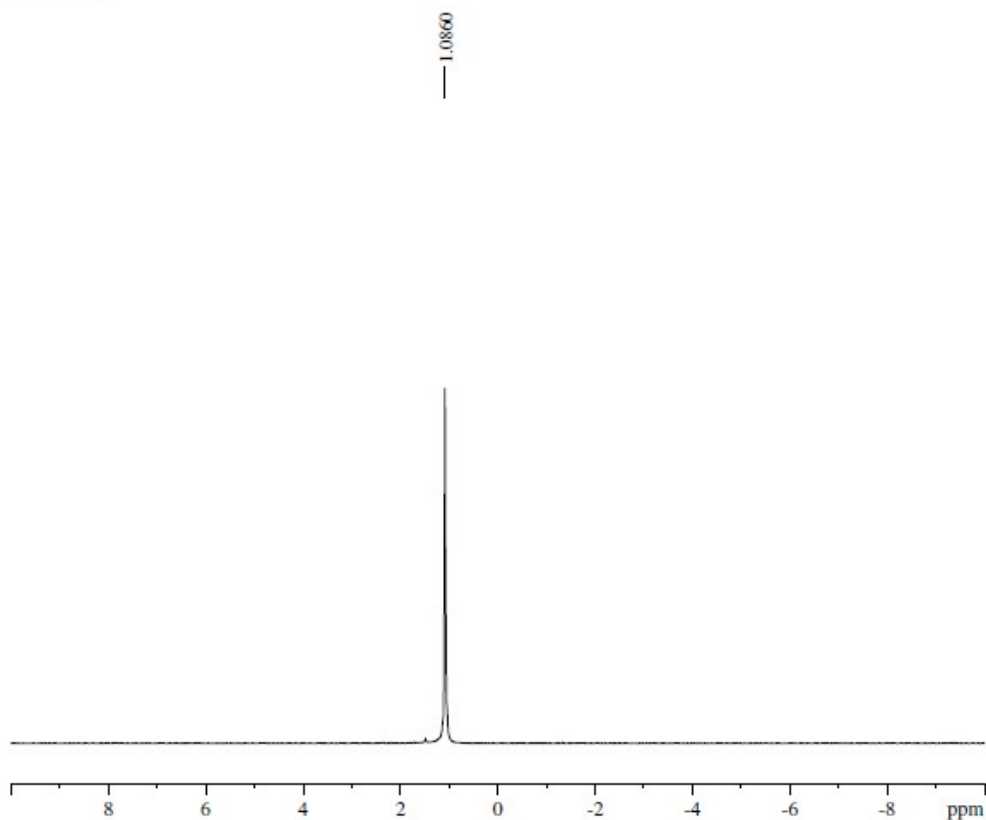

Figure S31:  $^{31}\text{P}\{\text{H}\}$  NMR spectrum of 3i

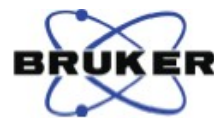

Current Data Parameters  
NAME 24-MAR-AN-2023  
EXPNO 340  
PROCNO 1

F2 - Acquisition Parameters  
Date\_ 20230325  
Time 5.04  
INSTRUM spect  
PROBHD 5 mm PABBO BB/  
PULPROG zgpg30  
TD 65536  
SOLVENT CDCl3  
NS 16  
DS 4  
SWH 64102.563 Hz  
FIDRES 0.978127 Hz  
AQ 0.5111808 sec  
RG 201.48  
DW 7.800 usec  
DE 6.50 usec  
TE 300.1 K  
D1 2.0000000 sec  
D11 0.0300000 sec  
TD0 1

==== CHANNEL f1 ====  
SFO1 161.9798402 MHz  
NUC1  $^{31}\text{P}$   
P1 15.00 usec  
PLW1 12.0000000 W

==== CHANNEL f2 ====  
SFO2 400.1621006 MHz  
NUC2  $^1\text{H}$   
CPDPRG[2] waltz16  
PCPD2 90.00 usec  
PLW2 13.0000000 W  
PLW12 0.27963999 W  
PLW13 0.22651000 W

F2 - Processing parameters  
SI 32768  
SF 161.9879400 MHz  
WDW EM  
SSB 0  
LB 1.00 Hz  
GB 0  
PC 1.40

NRJP-383

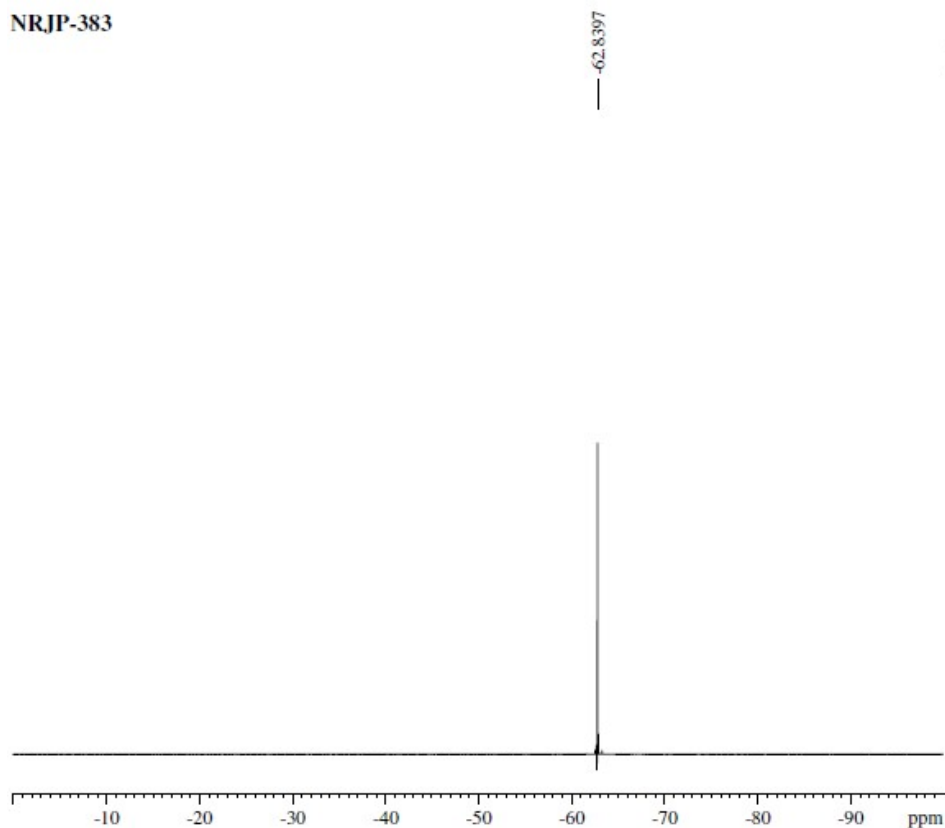

Figure S32:  $^{19}\text{F}\{\text{H}\}$  NMR spectrum of 3i

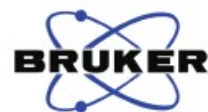

Current Data Parameters  
NAME 29-Mar-AN-2023  
EXPNO 410  
PROCNO 1

F2 - Acquisition Parameters  
Date\_ 20230330  
Time 5.28  
INSTRUM spect  
PROBHD 5 mm PABBO BB/  
PULPROG zgfbigqn.2  
TD 131072  
SOLVENT CDCl3  
NS 16  
DS 4  
SWH 89285.711 Hz  
FIDRES 0.681196 Hz  
AQ 0.7340032 sec  
RG 201.48  
DW 5.600 usec  
DE 6.50 usec  
TE 300.0 K  
D1 1.0000000 sec  
D11 0.0300000 sec  
D12 0.0002000 sec  
TD0 1

==== CHANNEL f1 ====  
SFO1 376.4894122 MHz  
NUC1  $^{19}\text{F}$   
P1 15.00 usec  
PLW1 21.0000000 W

==== CHANNEL f2 ====  
SFO2 400.1621006 MHz  
NUC2  $^1\text{H}$   
CPDPRG[2] waltz16  
PCPD2 90.00 usec  
PLW2 13.0000000 W  
PLW12 0.27963999 W

F2 - Processing parameters  
SI 65536  
SF 376.5270650 MHz  
WDW EM  
SSB 0  
LB 0.30 Hz  
GB 0  
PC 1.00

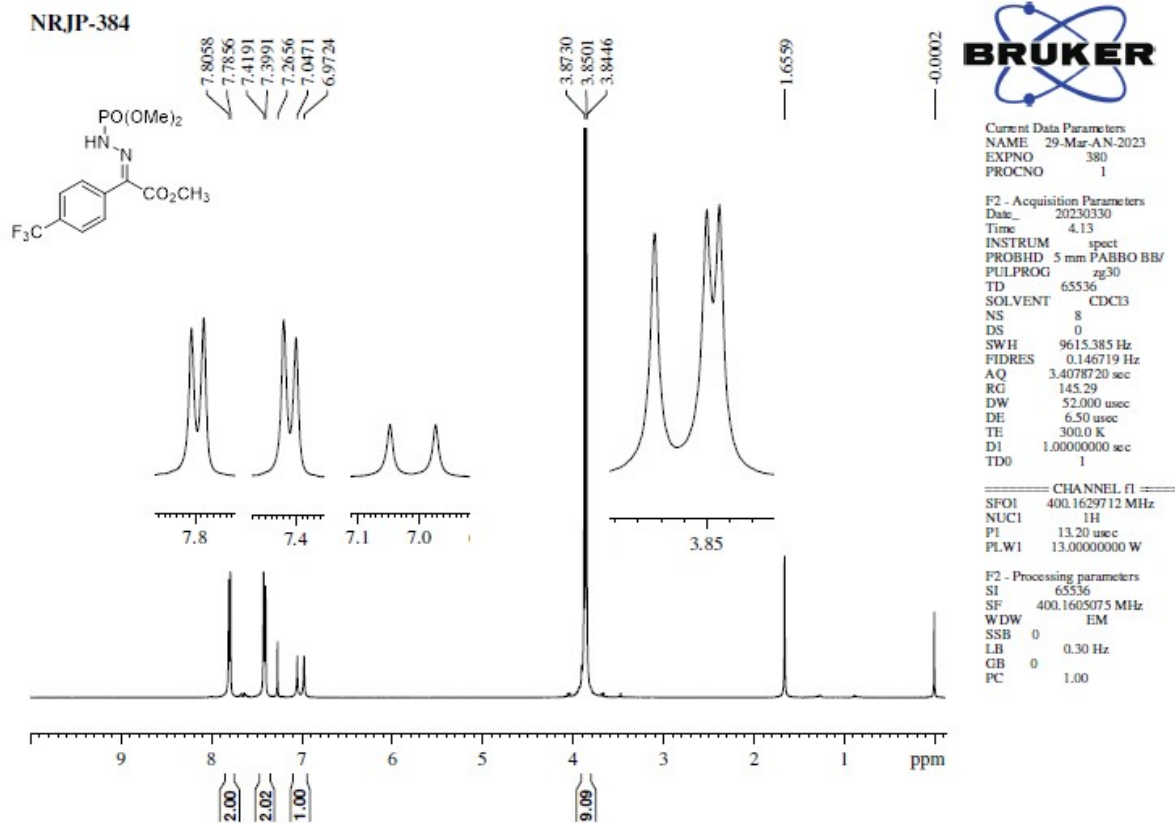

Figure S33:  $^1\text{H}$  NMR spectrum of 3j

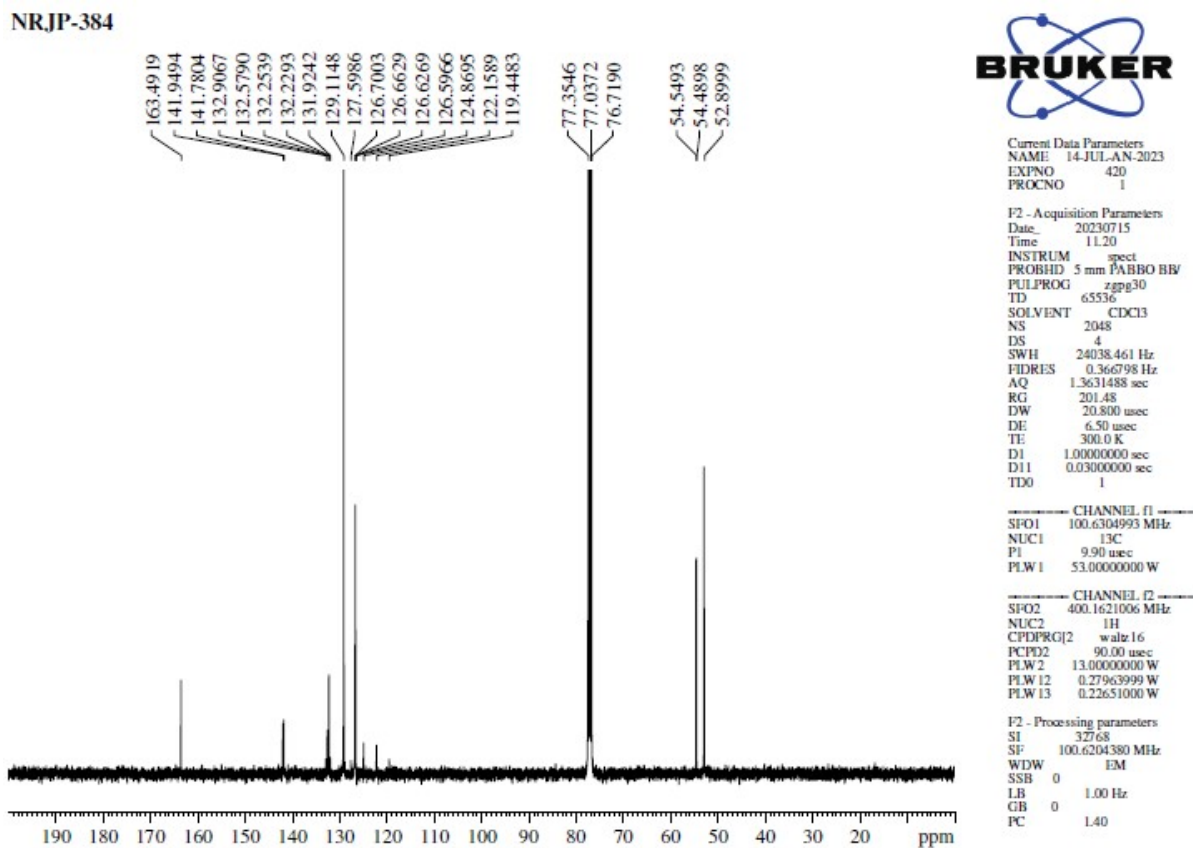

Figure S34:  $^{13}\text{C}\{^1\text{H}\}$  NMR spectrum of 3j

NRJP384

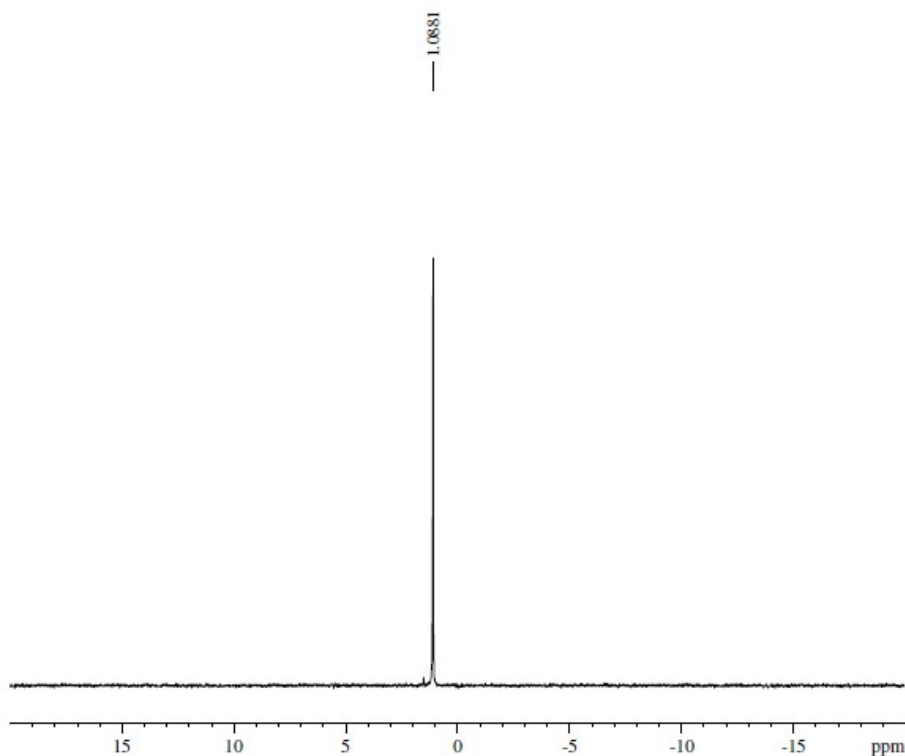Figure S35:  $^{31}\text{P}\{\text{H}\}$  NMR spectrum of 3j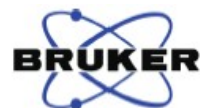

Current Data Parameters  
 NAME 31-Mar-AN-2023  
 EXPNO 350  
 PROCNO 1

F2 - Acquisition Parameters  
 Date\_ 20230401  
 Time 6.20  
 INSTRUM spect  
 PROBHD 5 mm PABBO BB/  
 PULPROG zgpg30  
 TD 65536  
 SOLVENT CDCl3  
 NS 16  
 DS 4  
 SWH 64102.563 Hz  
 FIDRES 0.978127 Hz  
 AQ 0.5111808 sec  
 RG 201.48  
 DW 7.800 usec  
 DE 6.50 usec  
 TE 300.1 K  
 D1 2.00000000 sec  
 D11 0.03000000 sec  
 TD0 1

==== CHANNEL f1 ====  
 SFO1 161.9798402 MHz  
 NUC1  $^{31}\text{P}$   
 P1 15.00 usec  
 PLW1 12.00000000 W

==== CHANNEL f2 ====  
 SFO2 400.1621006 MHz  
 NUC2  $^1\text{H}$   
 CPDPRG2 waltz16  
 PCPD2 90.00 usec  
 PLW2 13.00000000 W  
 PLW12 0.27963999 W  
 PLW13 0.22651000 W

F2 - Processing parameters  
 SI 32768  
 SF 161.9879400 MHz  
 WDW EM  
 SSB 0  
 LB 1.00 Hz  
 GB 0  
 PC 1.40

NRJP384

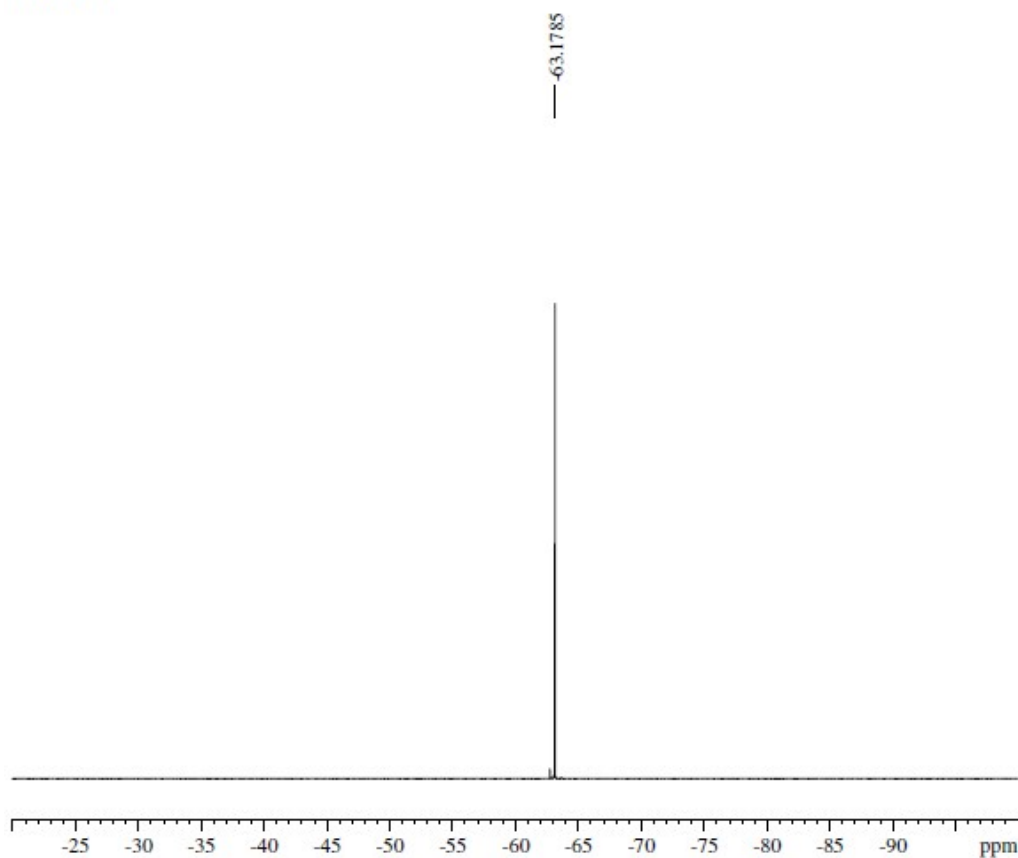Figure S36:  $^{19}\text{F}\{\text{H}\}$  NMR spectrum of 3j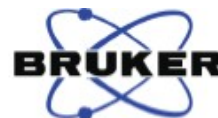

Current Data Parameters  
 NAME 31-Mar-AN-2023  
 EXPNO 340  
 PROCNO 1

F2 - Acquisition Parameters  
 Date\_ 20230401  
 Time 6.19  
 INSTRUM spect  
 PROBHD 5 mm PABBO BB/  
 PULPROG zgfbigqn.2  
 TD 131072  
 SOLVENT CDCl3  
 NS 16  
 DS 4  
 SWH 89285.711 Hz  
 FIDRES 0.681196 Hz  
 AQ 0.7340032 sec  
 RG 201.48  
 DW 5.600 usec  
 DE 6.50 usec  
 TE 300.1 K  
 D1 1.00000000 sec  
 D11 0.03000000 sec  
 D12 0.00002000 sec  
 TD0 1

==== CHANNEL f1 ====  
 SFO1 376.4894122 MHz  
 NUC1  $^{19}\text{F}$   
 P1 15.00 usec  
 PLW1 21.00000000 W

==== CHANNEL f2 ====  
 SFO2 400.1621006 MHz  
 NUC2  $^1\text{H}$   
 CPDPRG2 waltz16  
 PCPD2 90.00 usec  
 PLW2 13.00000000 W  
 PLW12 0.27963999 W

F2 - Processing parameters  
 SI 65536  
 SF 376.5270650 MHz  
 WDW EM  
 SSB 0  
 LB 0.30 Hz  
 GB 0  
 PC 1.00



NRJP387

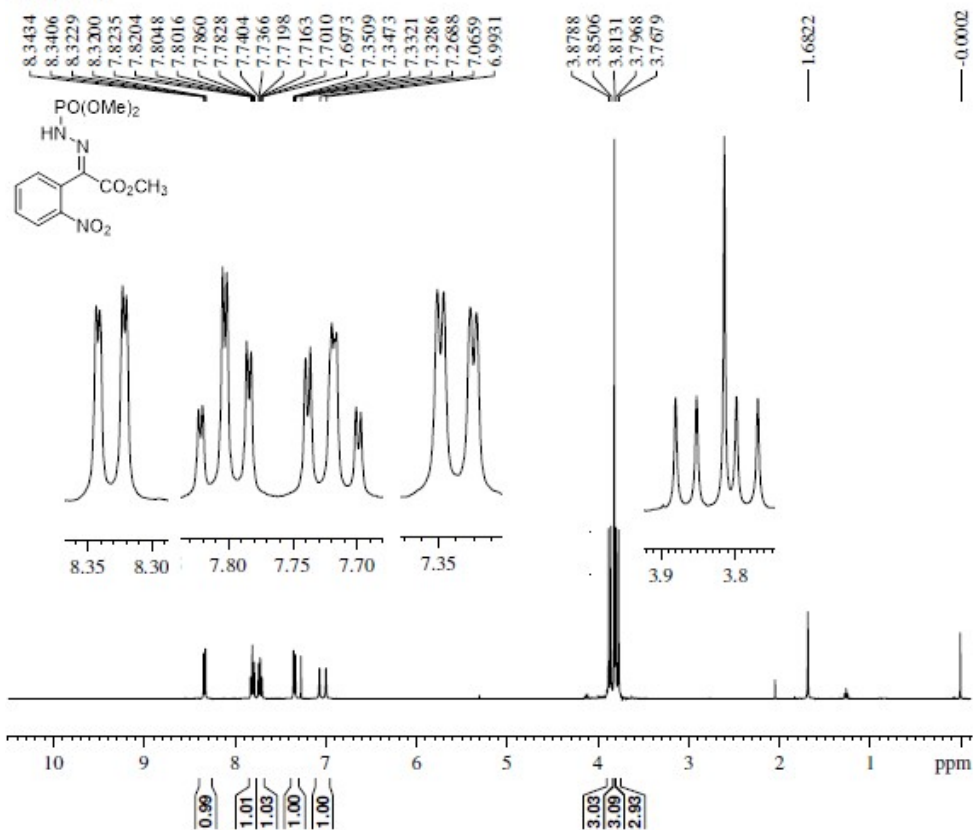Figure S37:  $^1\text{H}$  NMR spectrum of 3k

NRJP387

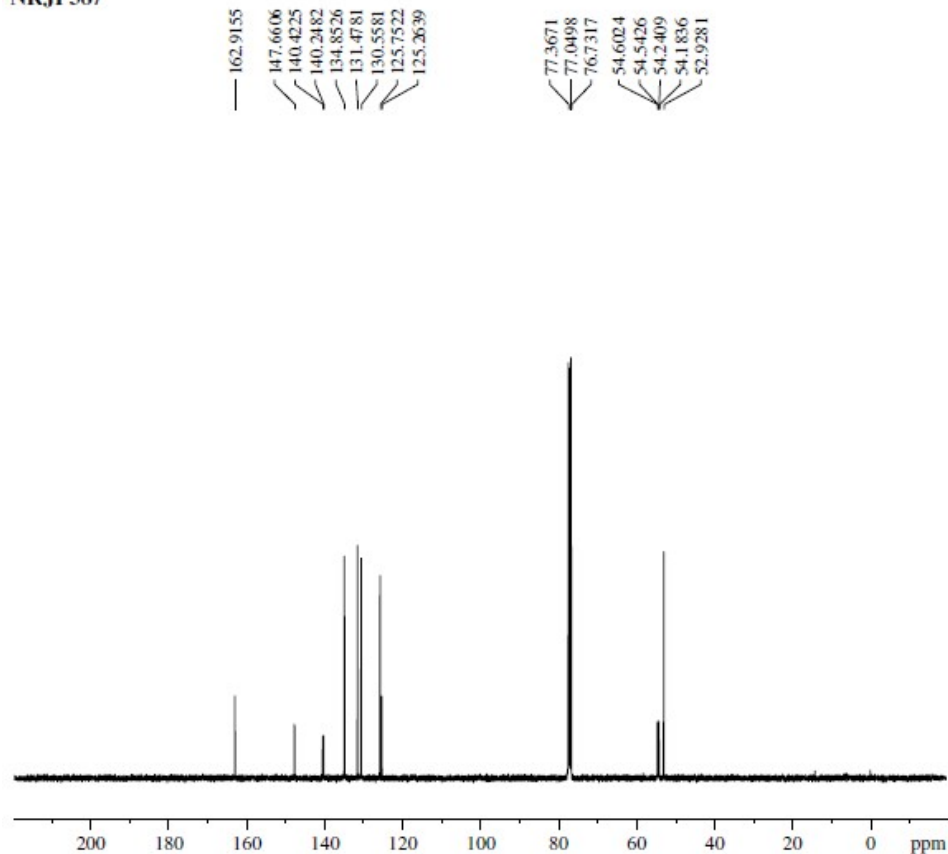Figure S38:  $^{13}\text{C}\{^1\text{H}\}$  NMR spectrum of 3k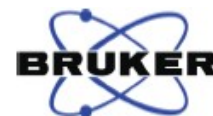

Current Data Parameters  
 NAME 03-Apr-AN-2023  
 EXPNO 330  
 PROCNO 1

F2 - Acquisition Parameters  
 Date\_ 20230404  
 Time 2.24  
 INSTRUM spect  
 PROBHD 5 mm PABBO BB/  
 PULPROG zg30  
 TD 65536  
 SOLVENT CDCl3  
 NS 8  
 DS 0  
 SWH 9615.385 Hz  
 FIDRES 0.146719 Hz  
 AQ 3.4078720 sec  
 RG 129.57  
 DW 52.000 usec  
 DE 6.50 usec  
 TE 300.0 K  
 D1 1.0000000 sec  
 TD0 1

==== CHANNEL f1 ====  
 SFO1 400.1629712 MHz  
 NUC1  $^1\text{H}$   
 P1 13.20 usec  
 PLW1 13.0000000 W

F2 - Processing parameters  
 SI 65536  
 SF 400.1605061 MHz  
 WDW EM  
 SSB 0  
 LB 0.30 Hz  
 GB 0  
 PC 1.00

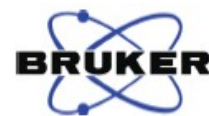

Current Data Parameters  
 NAME 31-Mar-AN-2023  
 EXPNO 330  
 PROCNO 1

F2 - Acquisition Parameters  
 Date\_ 20230401  
 Time 6.15  
 INSTRUM spect  
 PROBHD 5 mm PABBO BB/  
 PULPROG zgpg30  
 TD 65536  
 SOLVENT CDCl3  
 NS 2048  
 DS 0  
 SWH 24038.461 Hz  
 FIDRES 0.366798 Hz  
 AQ 1.3631488 sec  
 RG 291.48  
 DW 20.800 usec  
 DE 6.50 usec  
 TE 300.0 K  
 D1 1.0000000 sec  
 D11 0.0300000 sec  
 TD0 1

==== CHANNEL f1 ====  
 SFO1 100.6304993 MHz  
 NUC1  $^{13}\text{C}$   
 P1 9.90 usec  
 PLW1 53.0000000 W

==== CHANNEL f2 ====  
 SFO2 400.1621006 MHz  
 NUC2  $^1\text{H}$   
 CPDPRG[2] waltz16  
 PCPD2 90.00 usec  
 PLW2 13.0000000 W  
 PLW12 0.27963999 W  
 PLW13 0.22651000 W

F2 - Processing parameters  
 SI 32768  
 SF 100.6204380 MHz  
 WDW EM  
 SSB 0  
 LB 1.00 Hz  
 GB 0  
 PC 1.40

NRJP387

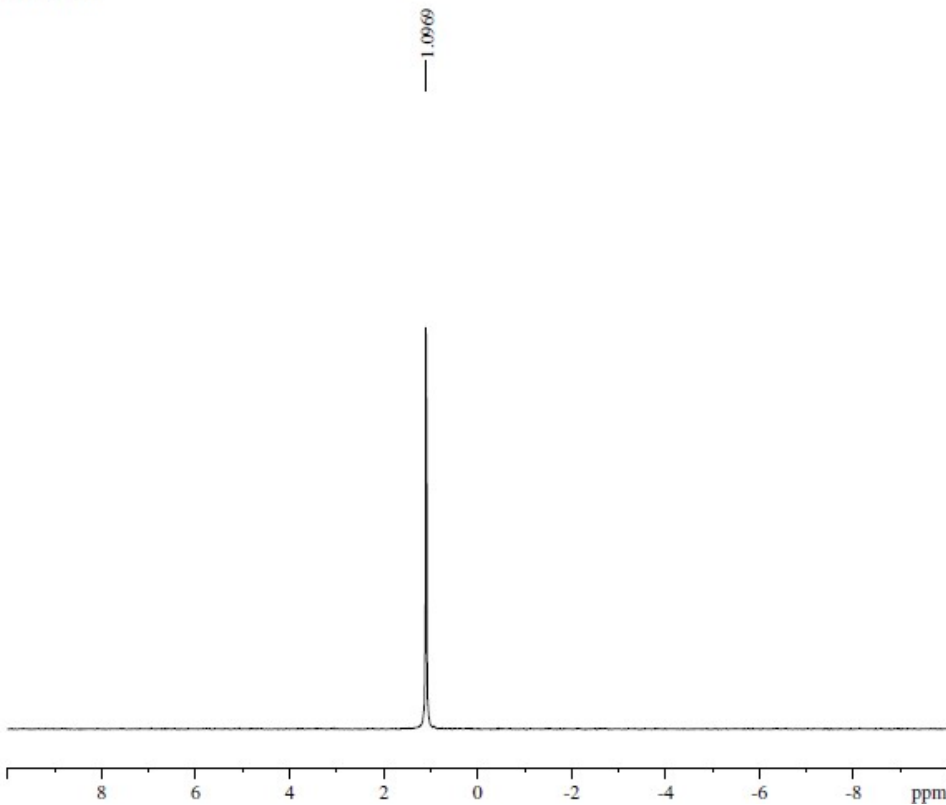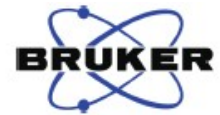

Current Data Parameters  
 NAME 31-Mar-AN-2023  
 EXPNO 320  
 PROCNO 1

F2 - Acquisition Parameters  
 Date\_ 20230401  
 Time 5.21  
 INSTRUM spect  
 PROBHD 5 mm PABBO BB/  
 PULPROG zgpg30  
 TD 65536  
 SOLVENT CDCl3  
 NS 16  
 DS 4  
 SWH 64102.563 Hz  
 FIDRES 0.978127 Hz  
 AQ 0.5111808 sec  
 RG 201.48  
 DW 7.800 usec  
 DE 6.50 usec  
 TE 300.1 K  
 D1 2.00000000 sec  
 D11 0.03000000 sec  
 TD0 1

==== CHANNEL f1 ====  
 SFO1 161.9798402 MHz  
 NUC1 31P  
 P1 15.00 usec  
 PLW1 12.00000000 W

==== CHANNEL f2 ====  
 SFO2 400.1621006 MHz  
 NUC2 1H  
 CPDPRG[2] waltz16  
 PCPD2 90.00 usec  
 PLW2 13.00000000 W  
 PLW12 0.27963999 W  
 PLW13 0.22651000 W

F2 - Processing parameters  
 SI 32768  
 SF 161.9879400 MHz  
 WDW EM  
 SSB 0  
 LB 1.00 Hz  
 GB 0  
 PC 1.40

Figure S39: <sup>31</sup>P{<sup>1</sup>H} NMR spectrum of 3k

NRJP-389

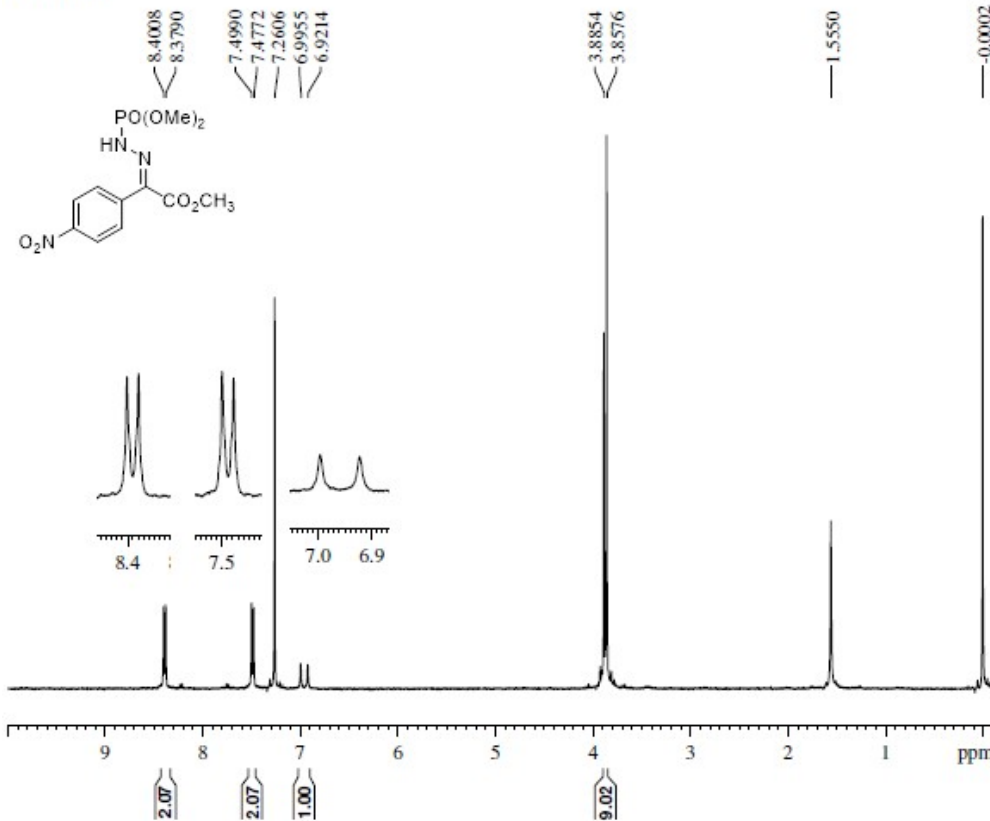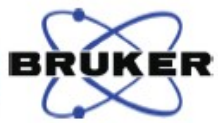

Current Data Parameters  
 NAME 26-APR-AN-2023  
 EXPNO 530  
 PROCNO 1

F2 - Acquisition Parameters  
 Date\_ 20230426  
 Time 12.30  
 INSTRUM spect  
 PROBHD 5 mm PABBO BB/  
 PULPROG zg30  
 TD 65536  
 SOLVENT CDCl3  
 NS 8  
 DS 0  
 SWH 9615.385 Hz  
 FIDRES 0.146719 Hz  
 AQ 3.4078720 sec  
 RG 201.48  
 DW 52.000 usec  
 DE 6.50 usec  
 TE 300.0 K  
 D1 1.00000000 sec  
 TD0 1

==== CHANNEL f1 ====  
 SFO1 400.1629712 MHz  
 NUC1 1H  
 P1 13.20 usec  
 PLW1 13.00000000 W

F2 - Processing parameters  
 SI 65536  
 SF 400.1605092 MHz  
 WDW EM  
 SSB 0  
 LB 0.30 Hz  
 GB 0  
 PC 1.00

Figure S40: <sup>1</sup>H NMR spectrum of 3l

NRJP 389

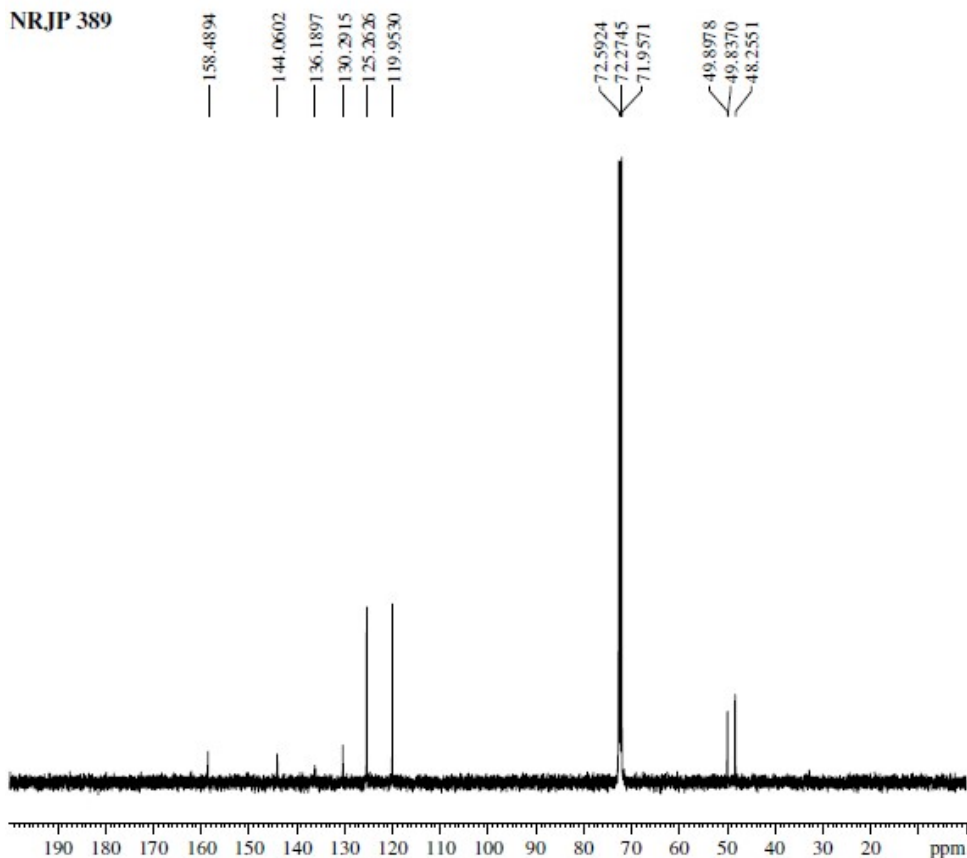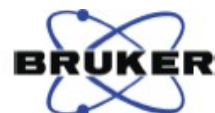

Current Data Parameters  
NAME 03-May-AN-2023  
EXPNO 330  
PROCNO 1

F2 - Acquisition Parameters  
Date\_ 20230504  
Time 8.08  
INSTRUM spect  
PROBHD 5 mm PABBO BB  
PULPROG zgpg30  
TD 65536  
SOLVENT DMSO  
NS 2048  
DS 0  
SWH 24038.461 Hz  
FIDRES 0.366798 Hz  
AQ 1.3631488 sec  
RG 201.48  
DW 20.800 usec  
DE 6.50 usec  
TE 300.0 K  
D1 1.00000000 sec  
D11 0.03000000 sec  
TD0 1

==== CHANNEL f1 ====  
SFO1 100.6304993 MHz  
NUC1  $^{13}\text{C}$   
P1 9.90 usec  
PLW1 53.00000000 W

==== CHANNEL f2 ====  
SFO2 400.1621006 MHz  
NUC2  $^1\text{H}$   
CPDPRG[2] walz16  
PCPD2 90.00 usec  
PLW2 13.00000000 W  
PLW12 0.27963999 W  
PLW13 0.22651000 W

F2 - Processing parameters  
SI 32768  
SF 100.6204380 MHz  
WDW EM  
SSB 0  
LB 1.00 Hz  
GB 0  
PC 1.40

Figure S41:  $^{13}\text{C}\{\text{H}\}$  NMR spectrum of 3l

NRJP 389

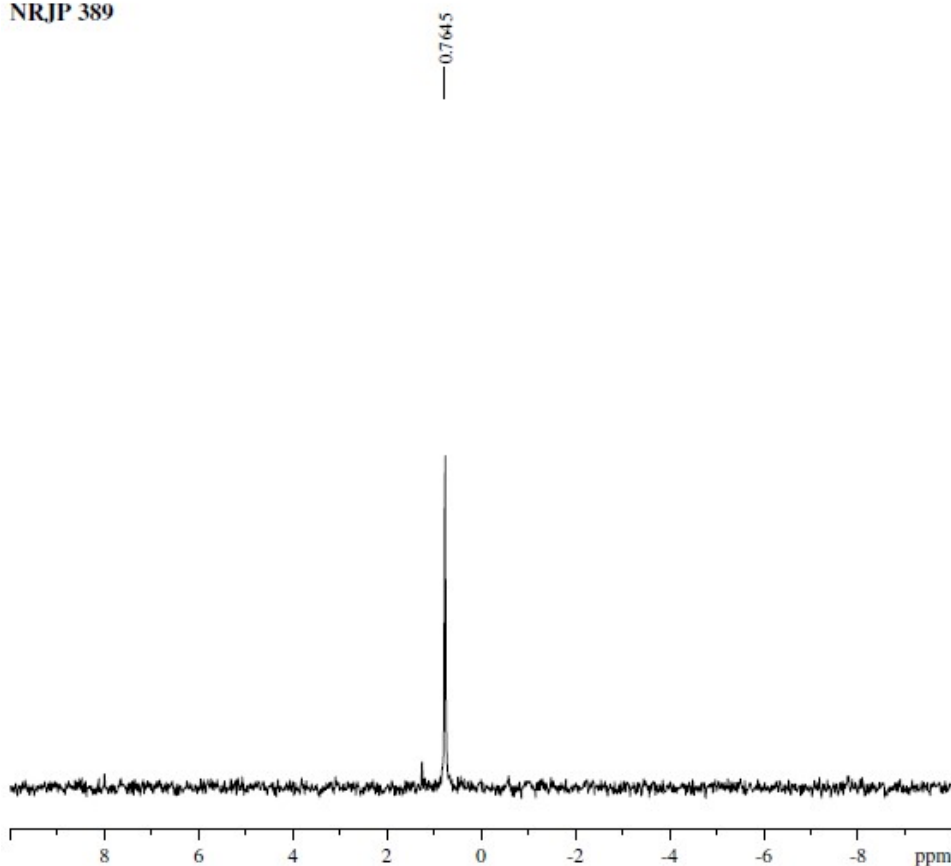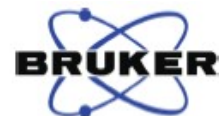

Current Data Parameters  
NAME 27-APR-AN-2023  
EXPNO 320  
PROCNO 1

F2 - Acquisition Parameters  
Date\_ 20230427  
Time 23.28  
INSTRUM spect  
PROBHD 5 mm PABBO BB  
PULPROG zgpg30  
TD 65536  
SOLVENT CDCl3  
NS 16  
DS 4  
SWH 64102.563 Hz  
FIDRES 0.978127 Hz  
AQ 0.5111808 sec  
RG 201.48  
DW 7.800 usec  
DE 6.50 usec  
TE 300.1 K  
D1 2.00000000 sec  
D11 0.03000000 sec  
TD0 1

==== CHANNEL f1 ====  
SFO1 161.9798402 MHz  
NUC1  $^{31}\text{P}$   
P1 15.00 usec  
PLW1 12.00000000 W

==== CHANNEL f2 ====  
SFO2 400.1621006 MHz  
NUC2  $^1\text{H}$   
CPDPRG[2] walz16  
PCPD2 90.00 usec  
PLW2 13.00000000 W  
PLW12 0.27963999 W  
PLW13 0.22651000 W

F2 - Processing parameters  
SI 32768  
SF 161.9879400 MHz  
WDW EM  
SSB 0  
LB 1.00 Hz  
GB 0  
PC 1.40

Figure S42:  $^{31}\text{P}\{\text{H}\}$  NMR spectrum of 3l

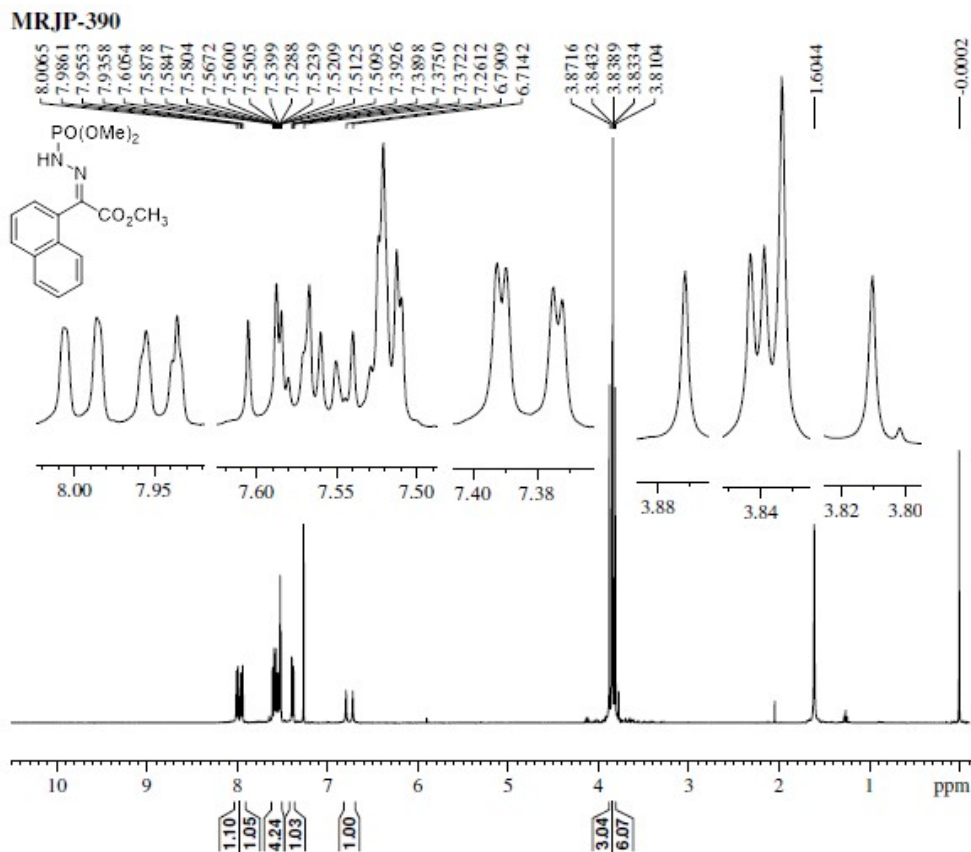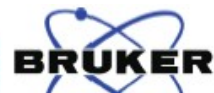

Current Data Parameters  
 NAME 01-Aug-AN-2023  
 EXPNO 470  
 PROCNO 1

F2 - Acquisition Parameters  
 Date\_ 20230801  
 Time 20.34  
 INSTRUM spect  
 PROBHD 5 mm PABBO BB/  
 PULPROG zg30  
 TD 65536  
 SOLVENT CDCl3  
 NS 8  
 DS 0  
 SWH 9615.385 Hz  
 FIDRES 0.146719 Hz  
 AQ 3.4078720 sec  
 RG 159.22  
 DW 52.000 usec  
 DE 6.50 usec  
 TE 300.0 K  
 D1 1.00000000 sec  
 TDO 1

==== CHANNEL f1 ====  
 SFO1 400.1629712 MHz  
 NUC1 1H  
 P1 13.20 usec  
 PLW1 13.00000000 W

F2 - Processing parameters  
 SI 65536  
 SF 400.1605091 MHz  
 WDW EM  
 SSB 0  
 LB 0.30 Hz  
 GB 0  
 PC 1.00

Figure S43: <sup>1</sup>H NMR spectrum of 3m

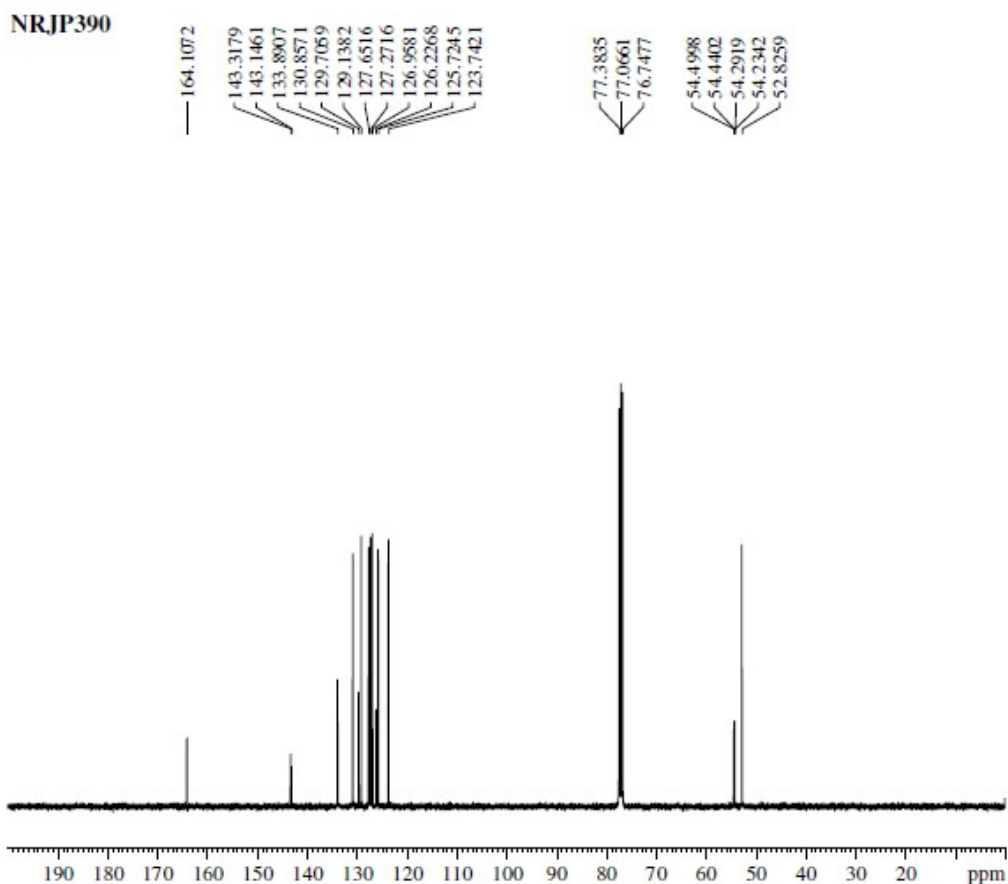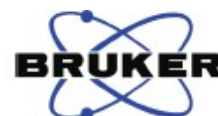

Current Data Parameters  
 NAME 03-Apr-AN-2023  
 EXPNO 350  
 PROCNO 1

F2 - Acquisition Parameters  
 Date\_ 20230404  
 Time 3.12  
 INSTRUM spect  
 PROBHD 5 mm PABBO BB/  
 PULPROG zgpg30  
 TD 65536  
 SOLVENT CDCl3  
 NS 2048  
 DS 4  
 SWH 24038.461 Hz  
 FIDRES 0.366798 Hz  
 AQ 1.3631488 sec  
 RG 201.48  
 DW 20.800 usec  
 DE 6.50 usec  
 TE 300.0 K  
 D1 1.00000000 sec  
 D11 0.03000000 sec  
 TDO 1

==== CHANNEL f1 ====  
 SFO1 100.6304993 MHz  
 NUC1 13C  
 P1 9.90 usec  
 PLW1 53.00000000 W

==== CHANNEL f2 ====  
 SFO2 400.1621006 MHz  
 NUC2 1H  
 CPDPRG[2] waltz16  
 PCPD2 90.00 usec  
 PLW2 13.00000000 W  
 PLW12 0.27963999 W  
 PLW13 0.22651000 W

F2 - Processing parameters  
 SI 32768  
 SF 100.6204380 MHz  
 WDW EM  
 SSB 0  
 LB 1.00 Hz  
 GB 0  
 PC 1.40

Figure S44: <sup>13</sup>C{<sup>1</sup>H} NMR spectrum of 3m

NRJP390

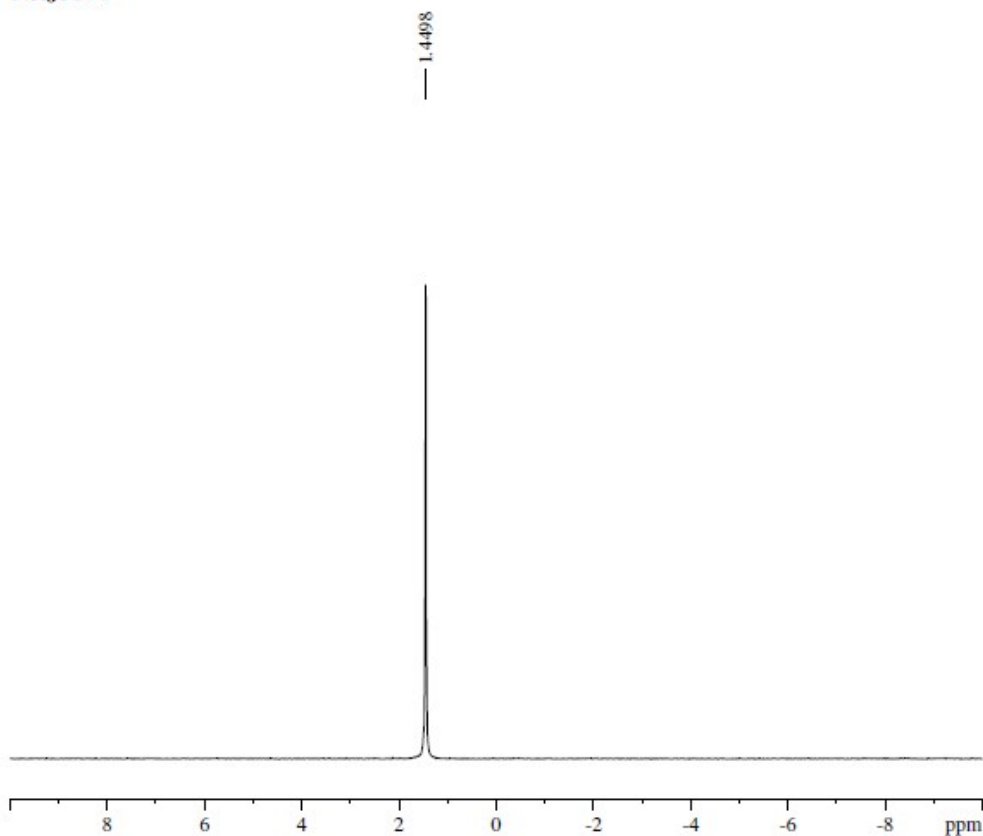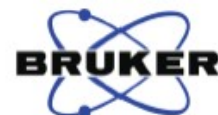

Current Data Parameters  
 NAME 03-Apr-AN-2023  
 EXPNO 360  
 PROCNO 1

F2 - Acquisition Parameters  
 Date\_ 20230404  
 Time 3.16  
 INSTRUM spect  
 PROBHD 5 mm PABBO BB  
 PULPROG zgpg30  
 TD 65536  
 SOLVENT CDCl3  
 NS 16  
 DS 4  
 SWH 64102.563 Hz  
 FIDRES 0.978127 Hz  
 AQ 0.5111808 sec  
 RG 201.48  
 DW 7.800 usec  
 DE 6.50 usec  
 TE 300.1 K  
 D1 2.00000000 sec  
 D11 0.03000000 sec  
 TDO 1

==== CHANNEL f1 =====  
 SFO1 161.9798402 MHz  
 NUC1 31P  
 P1 15.00 usec  
 PLW1 12.00000000 W

==== CHANNEL f2 =====  
 SFO2 400.1621006 MHz  
 NUC2 1H  
 CPDPRG[2] waltz16  
 PCPD2 90.00 usec  
 PLW2 13.00000000 W  
 PLW12 0.27963999 W  
 PLW13 0.22651000 W

F2 - Processing parameters  
 SI 32768  
 SF 161.9879400 MHz  
 WDW EM  
 SSB 0  
 LB 1.00 Hz  
 GB 0  
 PC 1.40

Figure S45:  $^{31}\text{P}\{\text{H}\}$  NMR spectrum of 3m

NRJP 370

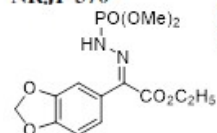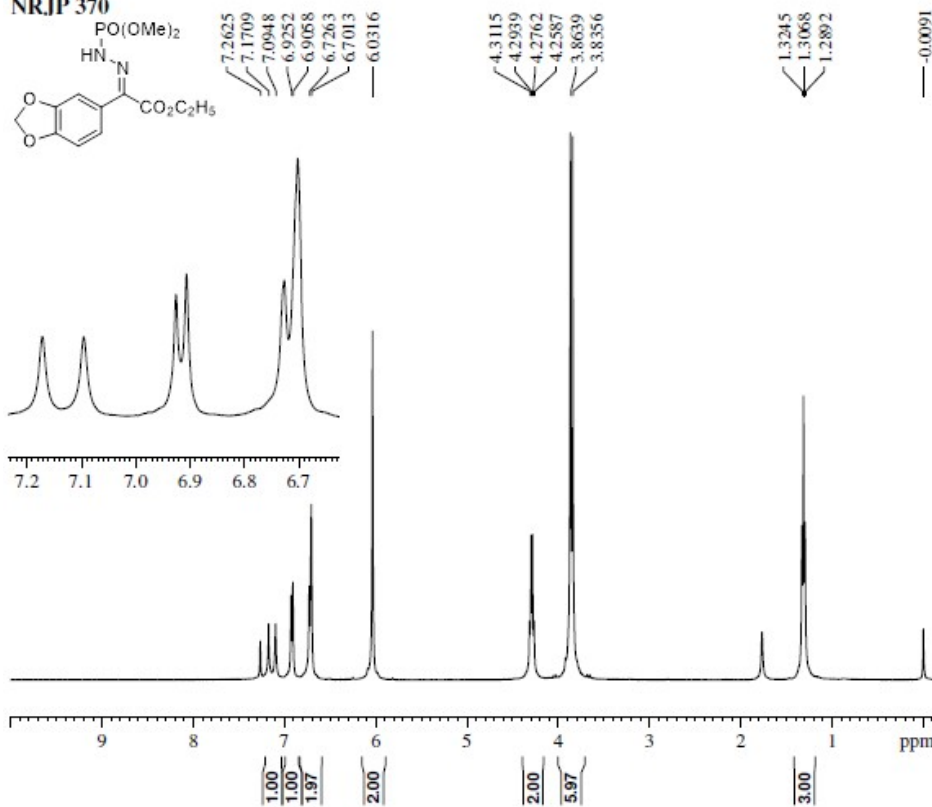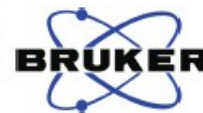

Current Data Parameters  
 NAME 31-MAY-AN-2023  
 EXPNO 310  
 PROCNO 1

F2 - Acquisition Parameters  
 Date\_ 20230531  
 Time 18.46  
 INSTRUM spect  
 PROBHD 5 mm PABBO BB/  
 PULPROG zg30  
 TD 65536  
 SOLVENT CDCl3  
 NS 8  
 DS 0  
 SWH 9615.385 Hz  
 FIDRES 0.146719 Hz  
 AQ 3.4078720 sec  
 RG 114.26  
 DW 52.000 usec  
 DE 6.50 usec  
 TE 300.0 K  
 D1 1.00000000 sec  
 TDO 1

==== CHANNEL f1 =====  
 SFO1 400.1629712 MHz  
 NUC1 1H  
 P1 13.20 usec  
 PLW1 13.00000000 W

F2 - Processing parameters  
 SI 65536  
 SF 400.1605089 MHz  
 WDW EM  
 SSB 0  
 LB 0.30 Hz  
 GB 0  
 PC 1.00

Figure S46:  $^1\text{H}$  NMR spectrum of 3n

NRJP 370

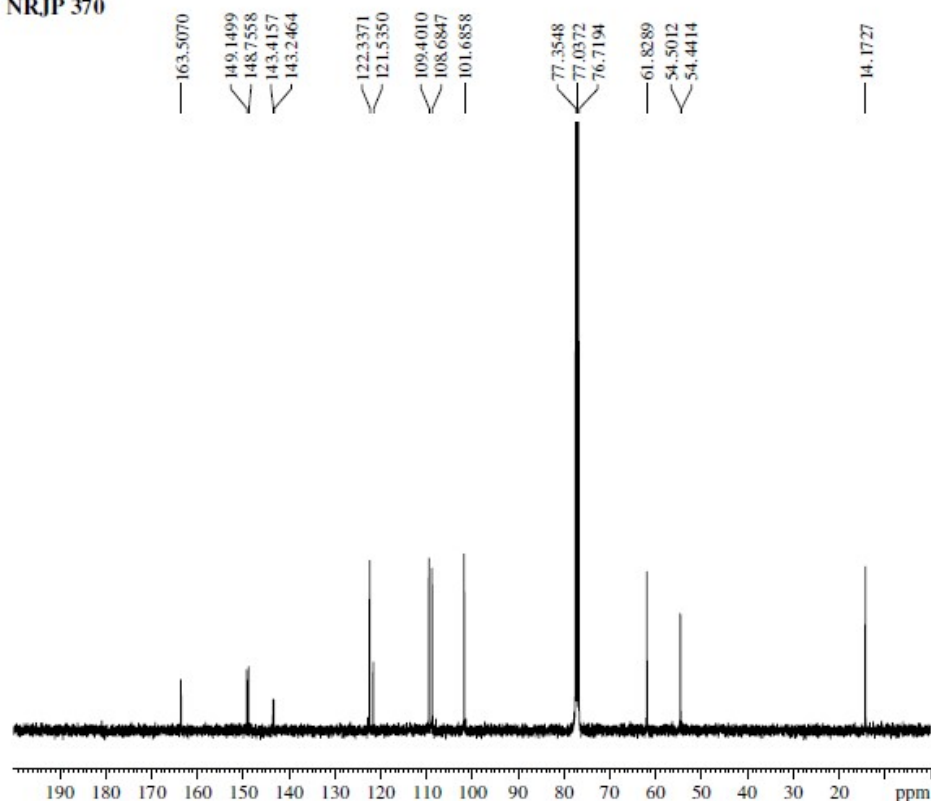

Figure S47:  $^{13}\text{C}\{\text{H}\}$  NMR spectrum of 3n

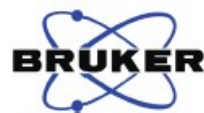

Current Data Parameters  
 NAME 06-JUN-AN-2023  
 EXPNO 330  
 PROCNO 1

F2 - Acquisition Parameters  
 Date\_ 20230607  
 Time 0.12  
 INSTRUM spect  
 PROBHD 5 mm PABBO BB/  
 PULPROG zgpg30  
 TD 65536  
 SOLVENT CDCl3  
 NS 2048  
 DS 0  
 SWH 24038.461 Hz  
 FIDRES 0.366798 Hz  
 AQ 1.3631488 sec  
 RG 201.48  
 DW 20.800 usec  
 DE 6.50 usec  
 TE 300.0 K  
 D1 1.0000000 sec  
 D11 0.03000000 sec  
 TDO 1

==== CHANNEL f1 ====  
 SFO1 100.6304993 MHz  
 NUC1  $^{13}\text{C}$   
 P1 9.90 usec  
 PLW1 53.0000000 W

==== CHANNEL f2 ====  
 SFO2 400.1621006 MHz  
 NUC2  $^1\text{H}$   
 CPDPRG2 waltz16  
 PCPD2 90.00 usec  
 PLW2 13.0000000 W  
 PLW12 0.27963999 W  
 PLW13 0.22651000 W

F2 - Processing parameters  
 SI 32768  
 SF 100.6204380 MHz  
 WDW EM  
 SSB 0  
 LB 1.00 Hz  
 GB 0  
 PC 1.40

NRJP 370

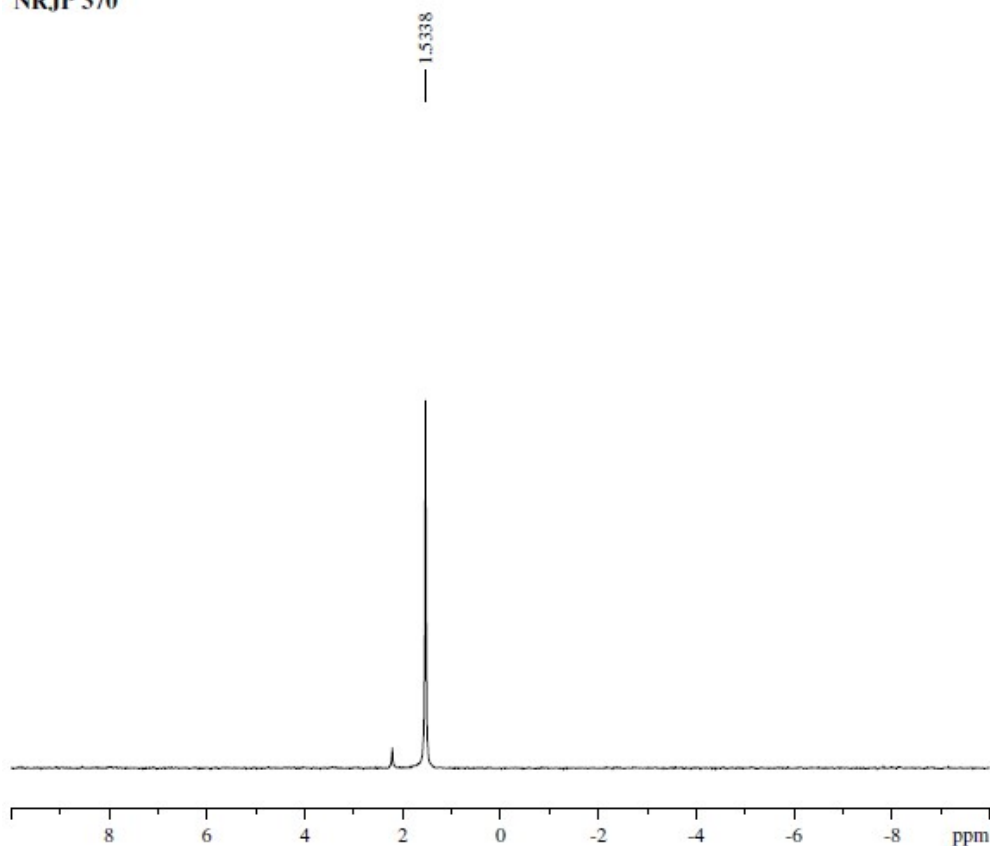

Figure S48:  $^{31}\text{P}\{\text{H}\}$  NMR spectrum of 3n

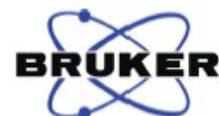

Current Data Parameters  
 NAME 07-JUN-AN-2023  
 EXPNO 340  
 PROCNO 1

F2 - Acquisition Parameters  
 Date\_ 20230607  
 Time 22.04  
 INSTRUM spect  
 PROBHD 5 mm PABBO BB/  
 PULPROG zgpg30  
 TD 65536  
 SOLVENT CDCl3  
 NS 16  
 DS 4  
 SWH 64102.563 Hz  
 FIDRES 0.978127 Hz  
 AQ 0.5111808 sec  
 RG 201.48  
 DW 7.800 usec  
 DE 6.50 usec  
 TE 300.1 K  
 D1 2.00000000 sec  
 D11 0.03000000 sec  
 TDO 1

==== CHANNEL f1 ====  
 SFO1 161.9798402 MHz  
 NUC1  $^{31}\text{P}$   
 P1 15.00 usec  
 PLW1 12.00000000 W

==== CHANNEL f2 ====  
 SFO2 400.1621006 MHz  
 NUC2  $^1\text{H}$   
 CPDPRG2 waltz16  
 PCPD2 90.00 usec  
 PLW2 13.00000000 W  
 PLW12 0.27963999 W  
 PLW13 0.22651000 W

F2 - Processing parameters  
 SI 32768  
 SF 161.9879400 MHz  
 WDW EM  
 SSB 0  
 LB 1.00 Hz  
 GB 0  
 PC 1.40

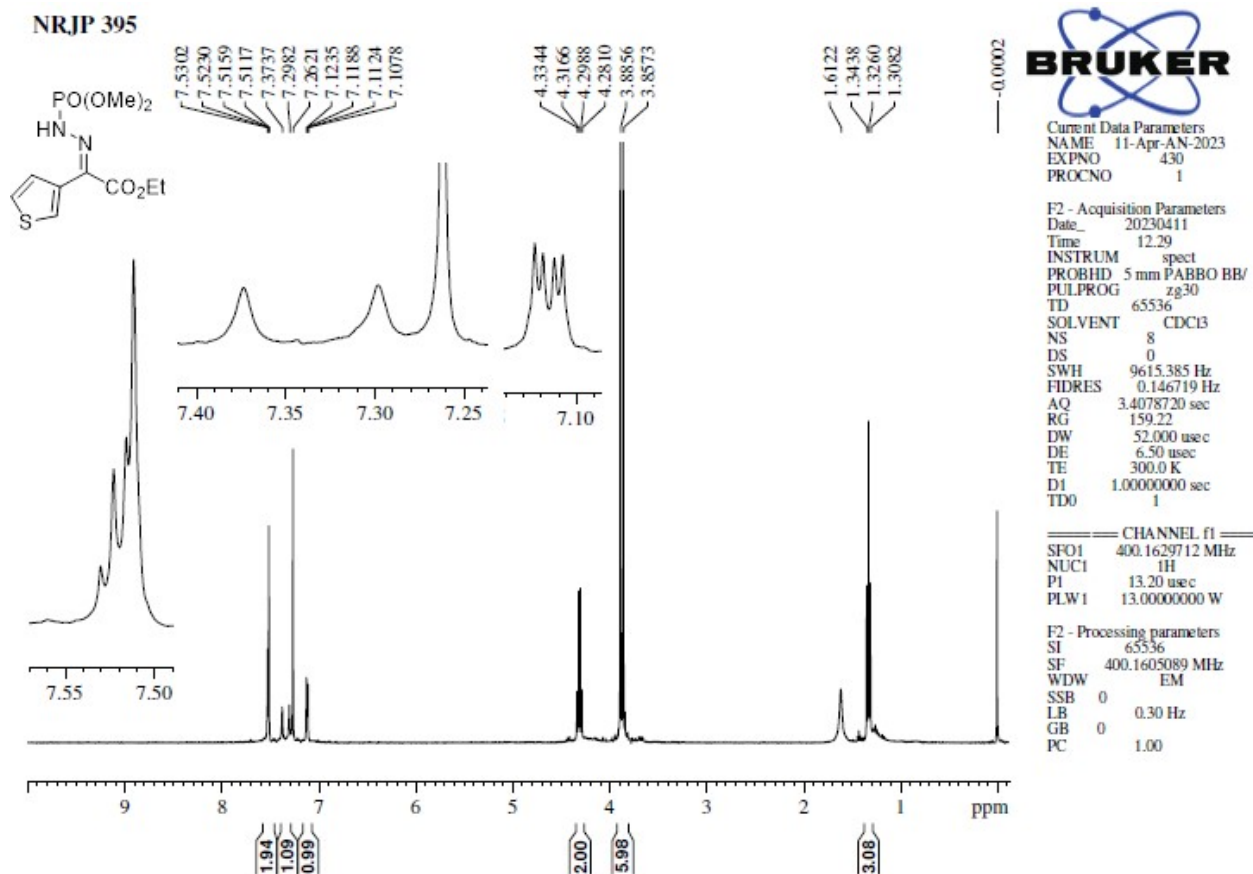

Figure S49: <sup>1</sup>H NMR spectrum of 3o

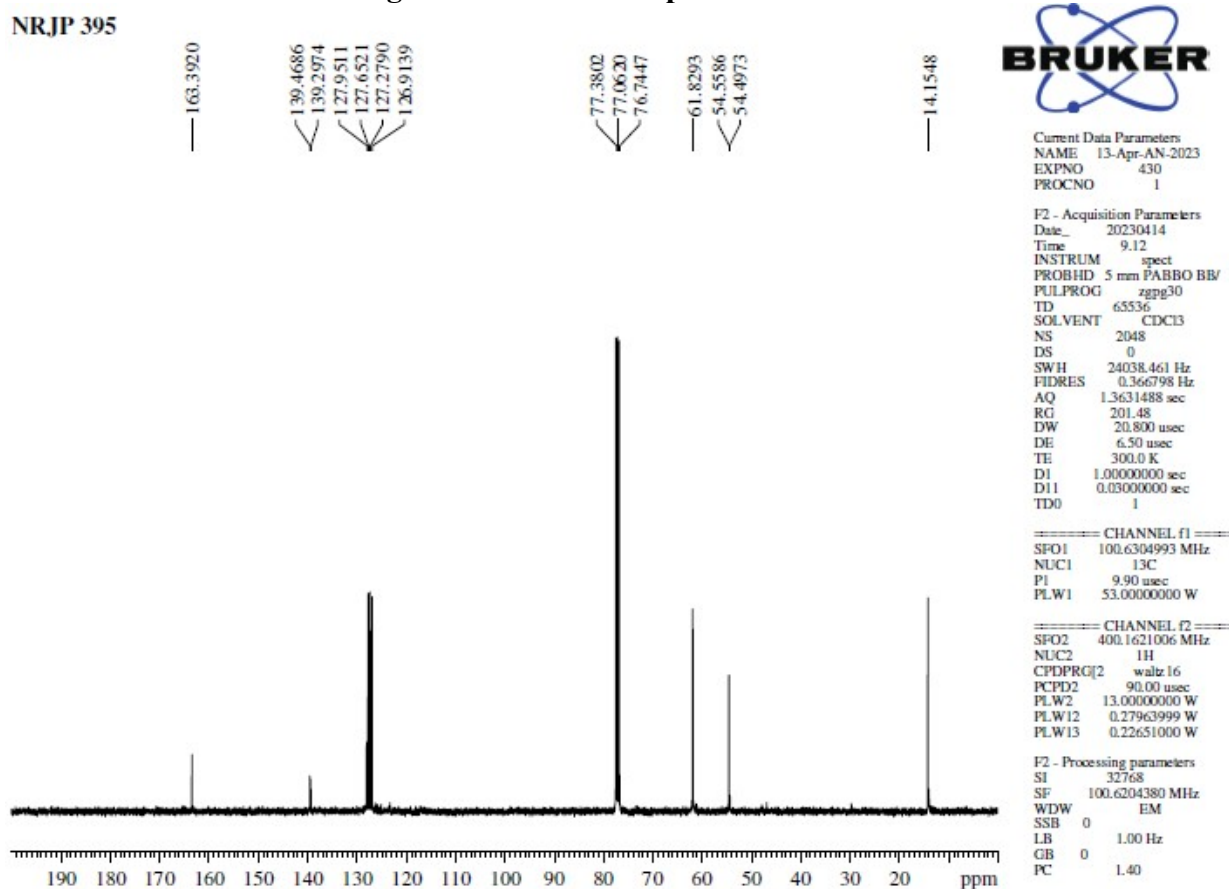

Figure S50: <sup>13</sup>C{<sup>1</sup>H} NMR spectrum of 3o

NRJP-395

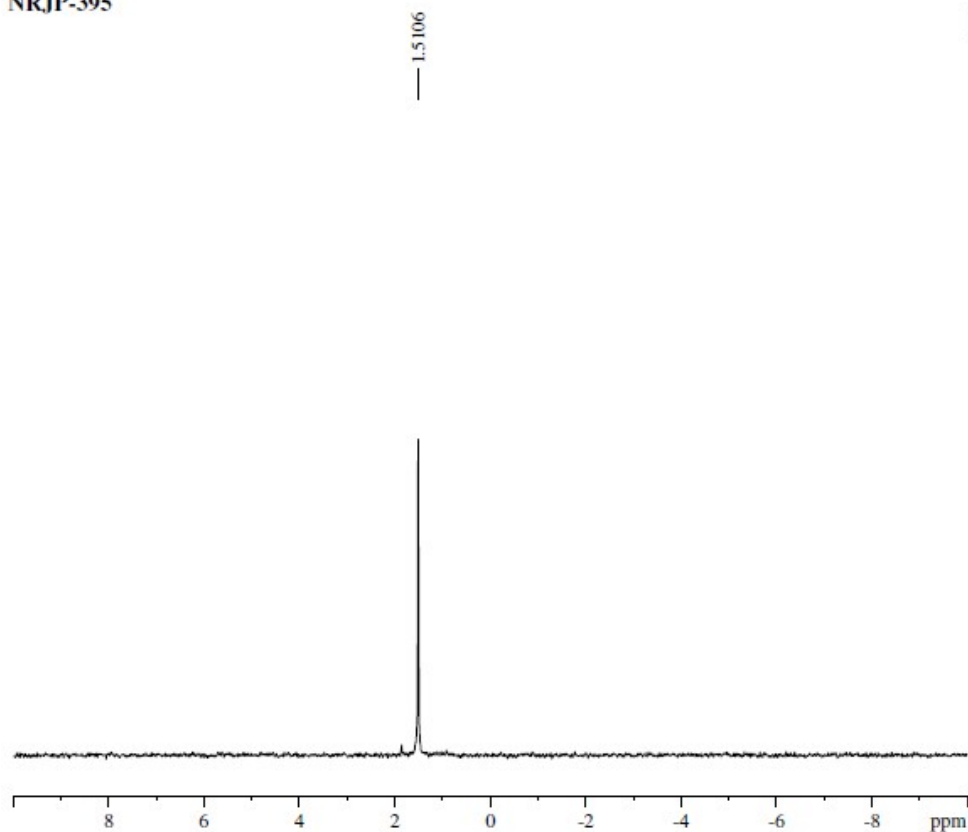Figure S51:  $^{31}\text{P}\{\text{H}\}$  NMR spectrum of 3o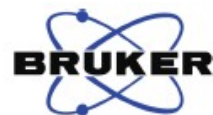

Current Data Parameters  
 NAME 12-Apr-2023  
 EXPNO 330  
 PROCNO 1

F2 - Acquisition Parameters  
 Date\_ 20230412  
 Time 19.37  
 INSTRUM spect  
 PROBHD 5 mm PABBO BB/  
 PULPROG zgpg30  
 TD 65536  
 SOLVENT CDCl3  
 NS 16  
 DS 4  
 SWH 64102.563 Hz  
 FIDRES 0.978127 Hz  
 AQ 0.5111808 sec  
 RG 201.48  
 DW 7.800 usec  
 DE 6.50 usec  
 TE 300.1 K  
 D1 2.00000000 sec  
 D11 0.03000000 sec  
 TD0 1

==== CHANNEL f1 ====  
 SFO1 161.9798402 MHz  
 NUC1  $^{31}\text{P}$   
 P1 15.00 usec  
 PLW1 12.00000000 W

==== CHANNEL f2 ====  
 SFO2 400.1621006 MHz  
 NUC2  $^1\text{H}$   
 CDPORG[2] waltz16  
 PCPD2 90.00 usec  
 PLW2 13.00000000 W  
 PLW12 0.27963999 W  
 PLW13 0.22651000 W

F2 - Processing parameters  
 SI 32768  
 SF 161.9879400 MHz  
 WDW EM  
 SSB 0  
 LB 1.00 Hz  
 GB 0  
 PC 1.40

NRJP 246

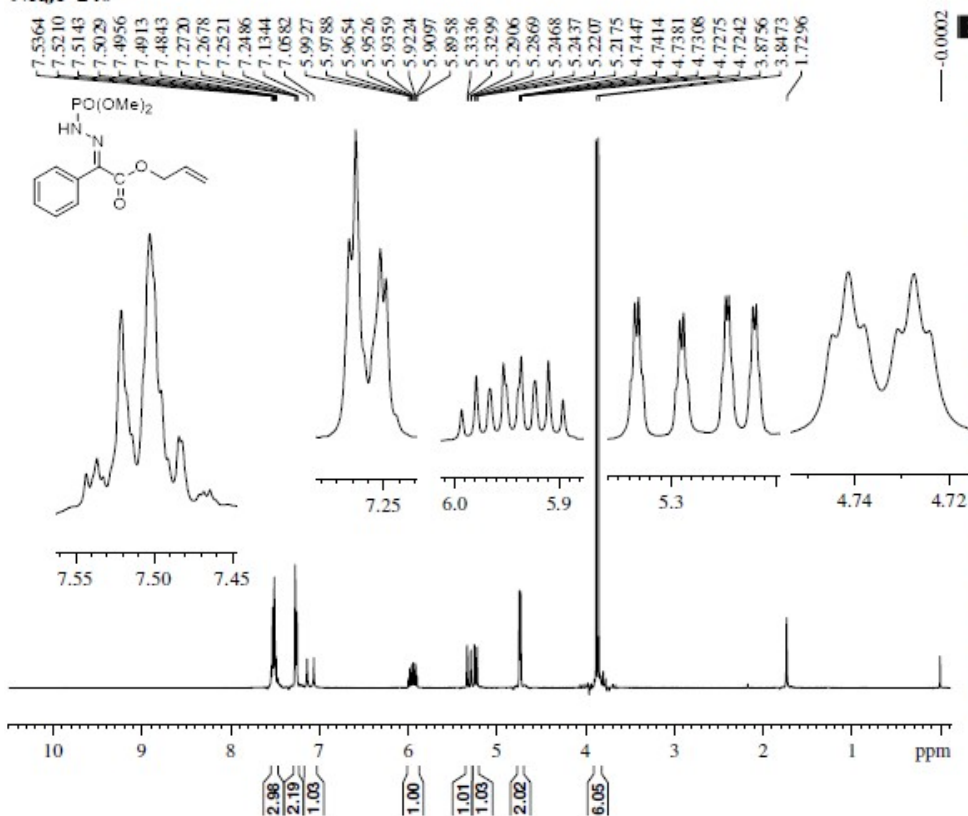Figure S52:  $^1\text{H}$  NMR spectrum of 3p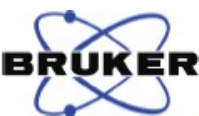

Current Data Parameters  
 NAME 24-Apr-AN-2023  
 EXPNO 420  
 PROCNO 1

F2 - Acquisition Parameters  
 Date\_ 20230424  
 Time 22.28  
 INSTRUM spect  
 PROBHD 5 mm PABBO BB/  
 PULPROG zg30  
 TD 65536  
 SOLVENT CDCl3  
 NS 8  
 DS 0  
 SWH 9615.385 Hz  
 FIDRES 0.146719 Hz  
 AQ 3.4078720 sec  
 RG 100.41  
 DW 52.000 usec  
 DE 6.50 usec  
 TE 300.0 K  
 D1 1.00000000 sec  
 TD0 1

==== CHANNEL f1 ====  
 SFO1 400.1629712 MHz  
 NUC1  $^1\text{H}$   
 P1 13.20 usec  
 PLW1 13.00000000 W

F2 - Processing parameters  
 SI 65536  
 SF 400.1605065 MHz  
 WDW EM  
 SSB 0  
 LB 0.30 Hz  
 GB 0  
 PC 1.00



NRJP 246

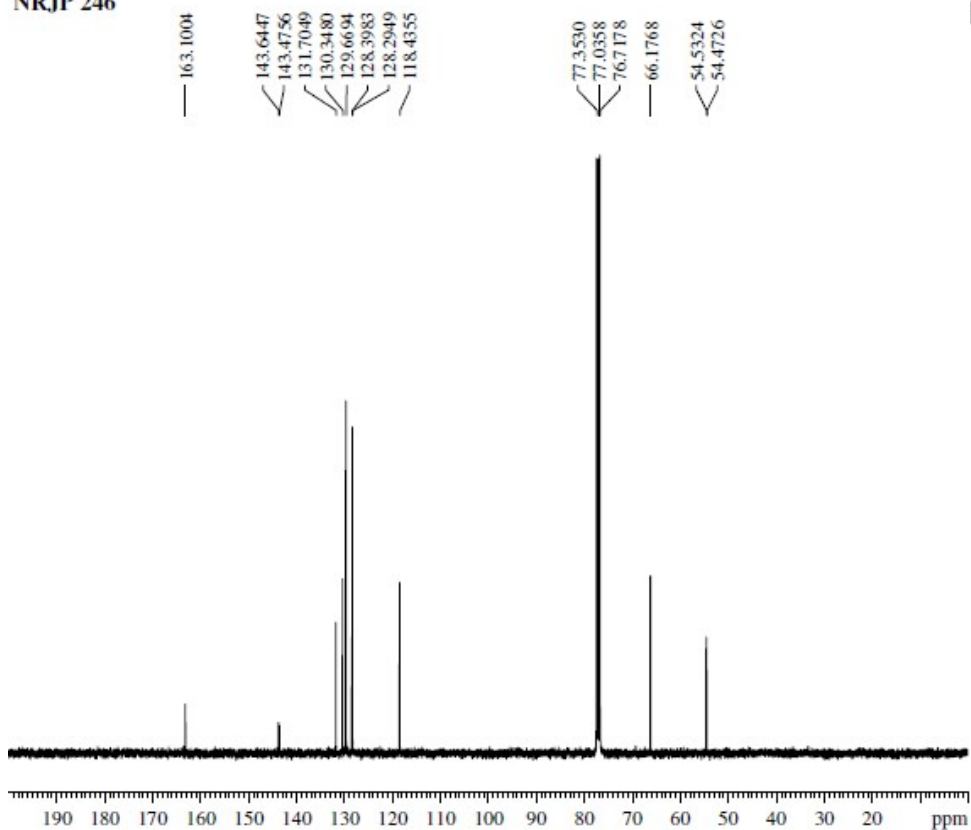

Figure S53:  $^{13}\text{C}\{\text{H}\}$  NMR spectrum of 3p

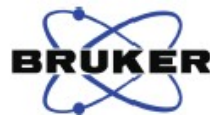

Current Data Parameters  
NAME 24-Apr-AN-2023  
EXPNO 430  
PROCNO 1

F2 - Acquisition Parameters  
Date\_ 20230424  
Time 23.05  
INSTRUM spect  
PROBHD 5 mm PABBO BB  
PULPROG zgpg30  
TD 65536  
SOLVENT CDCl3  
NS 2048  
DS 0  
SWH 24038.461 Hz  
FIDRES 0.366798 Hz  
AQ 1.3631488 sec  
RG 201.48  
DW 20.800 usec  
DE 6.50 usec  
TE 300.0 K  
D1 1.0000000 sec  
D11 0.0300000 sec  
TD0 1

==== CHANNEL f1 ====  
SFO1 100.6304993 MHz  
NUC1  $^{13}\text{C}$   
P1 9.90 usec  
PLW1 53.0000000 W

==== CHANNEL f2 ====  
SFO2 400.1621006 MHz  
NUC2  $^1\text{H}$   
CPDPRG2 waltz16  
PCPD2 90.00 usec  
PLW2 13.0000000 W  
PLW12 0.27963999 W  
PLW13 0.22651000 W

F2 - Processing parameters  
SI 32768  
SF 100.6204380 MHz  
WDW EM  
SSB 0  
LB 1.00 Hz  
GB 0  
PC 1.40

NRPK-246

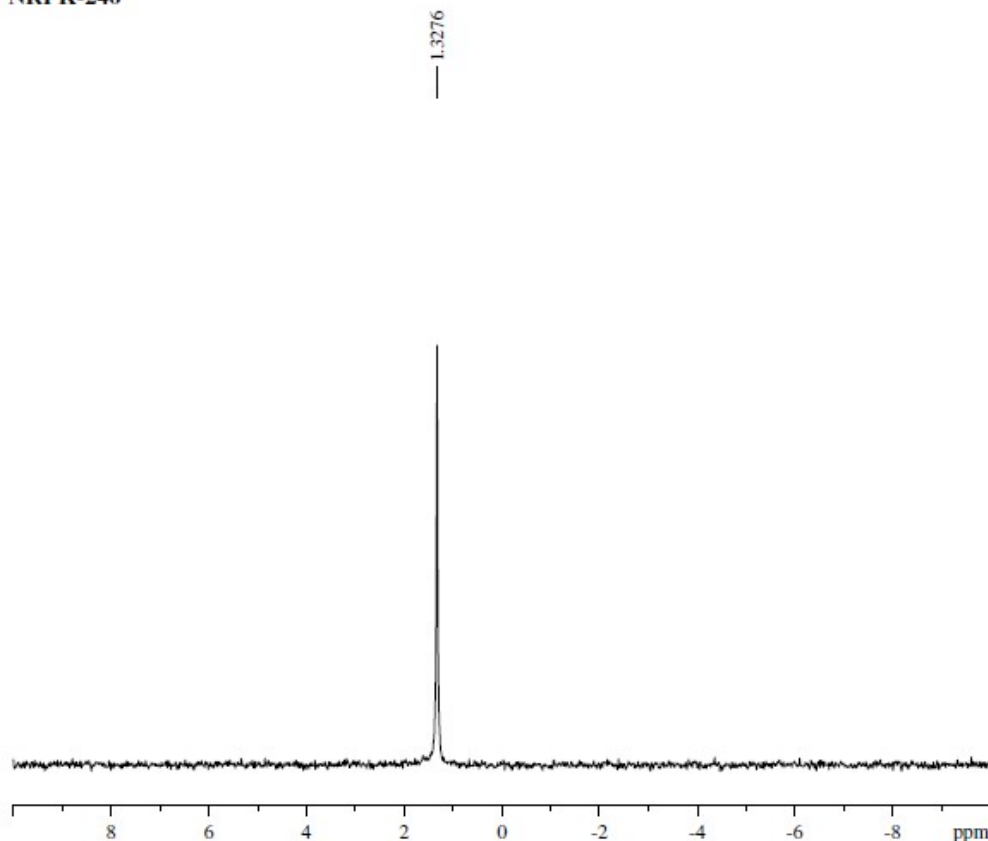

Figure S54:  $^{31}\text{P}\{\text{H}\}$  NMR spectrum of 3p

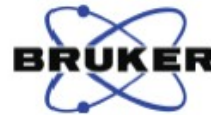

Current Data Parameters  
NAME 20-Mar-AN-2023  
EXPNO 470  
PROCNO 1

F2 - Acquisition Parameters  
Date\_ 20230321  
Time 2.24  
INSTRUM spect  
PROBHD 5 mm PABBO BB  
PULPROG zgpg30  
TD 65536  
SOLVENT CDCl3  
NS 16  
DS 4  
SWH 64102.563 Hz  
FIDRES 0.978127 Hz  
AQ 0.5111808 sec  
RG 201.48  
DW 7.800 usec  
DE 6.50 usec  
TE 300.1 K  
D1 2.0000000 sec  
D11 0.0300000 sec  
TD0 1

==== CHANNEL f1 ====  
SFO1 161.9798402 MHz  
NUC1  $^{31}\text{P}$   
P1 15.00 usec  
PLW1 12.0000000 W

==== CHANNEL f2 ====  
SFO2 400.1621006 MHz  
NUC2  $^1\text{H}$   
CPDPRG2 waltz16  
PCPD2 90.00 usec  
PLW2 13.0000000 W  
PLW12 0.27963999 W  
PLW13 0.22651000 W

F2 - Processing parameters  
SI 32768  
SF 161.9879400 MHz  
WDW EM  
SSB 0  
LB 1.00 Hz  
GB 0  
PC 1.40

NRJP-379

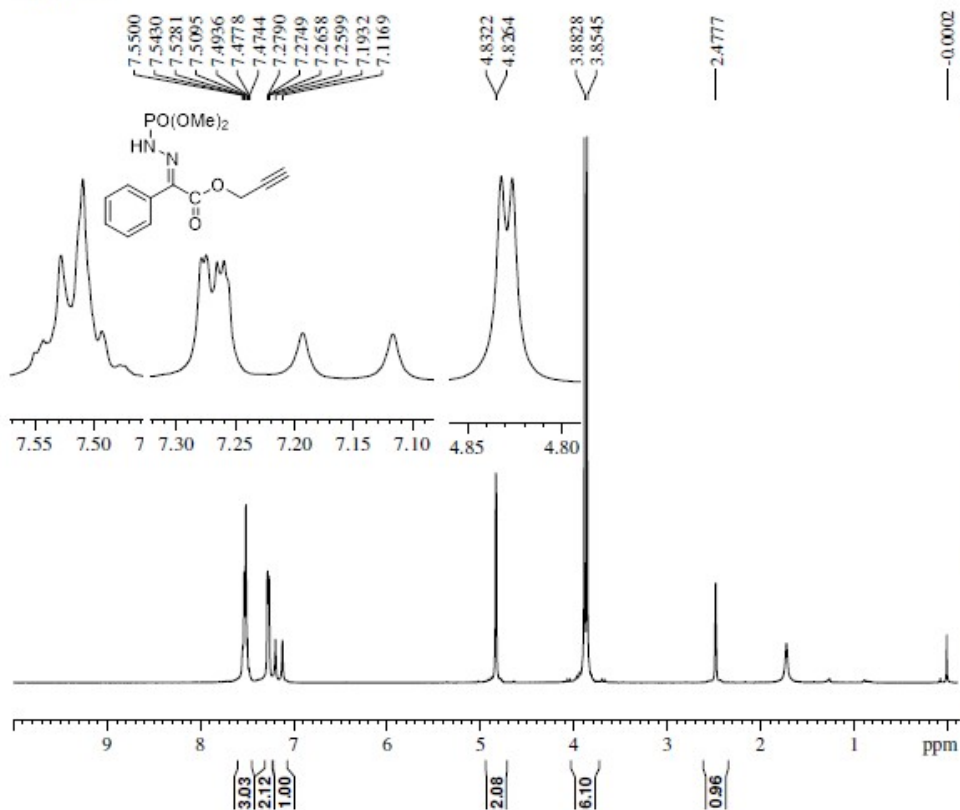

**BRUKER**

Current Data Parameters  
 NAME 16-Mar-AN-2023  
 EXPNO 360  
 PROCNO 1

F2 - Acquisition Parameters  
 Date\_ 20230316  
 Time 20.25  
 INSTRUM spect  
 PROBHD 5 mm PABBO BB  
 PULPROG zg30  
 TD 65536  
 SOLVENT CDCl3  
 NS 8  
 DS 0  
 SWH 9615.385 Hz  
 FIDRES 0.146719 Hz  
 AQ 3.4078720 sec  
 RG 129.57  
 DW 52.000 usec  
 DE 6.50 usec  
 TE 300.0 K  
 D1 1.00000000 sec  
 TDO 1

==== CHANNEL f1 =====  
 SFO1 400.1629712 MHz  
 NUC1 1H  
 P1 13.20 usec  
 PLW1 13.00000000 W

F2 - Processing parameters  
 SI 65536  
 SF 400.1605071 MHz  
 WDW EM  
 SSB 0  
 LB 0.30 Hz  
 GB 0  
 PC 1.00

Figure S55: <sup>1</sup>H NMR spectrum of 3q

NRJP-379

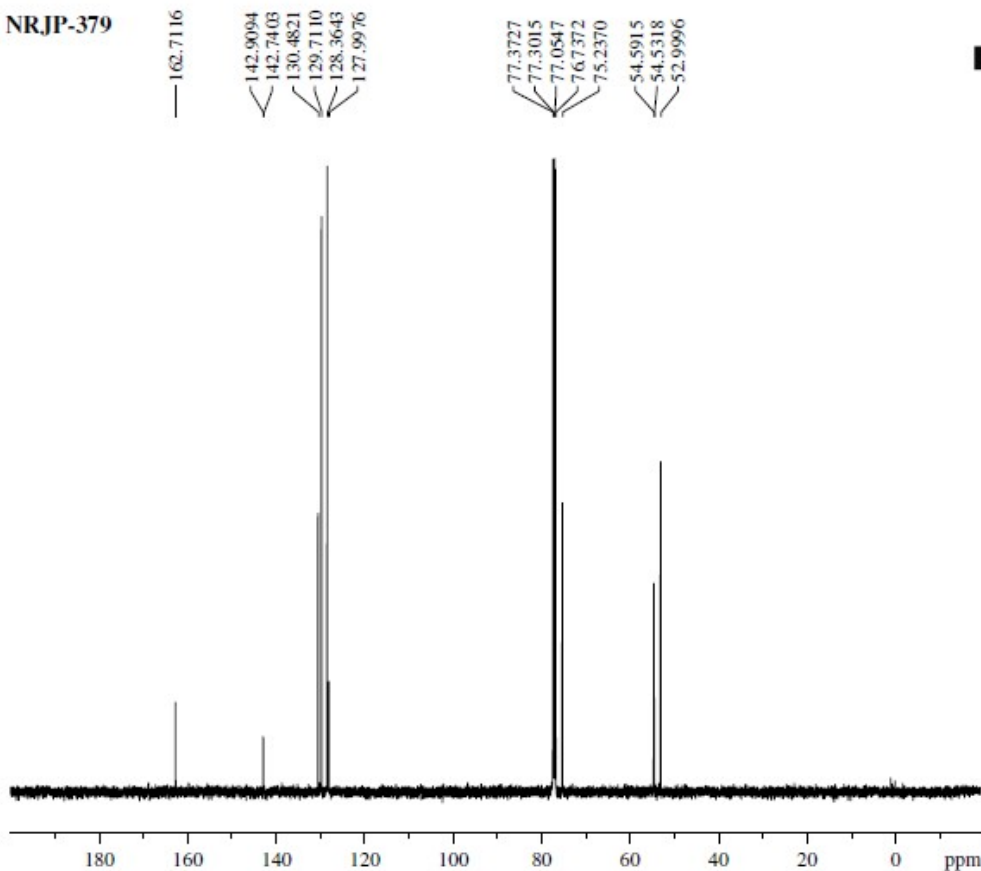

**BRUKER**

Current Data Parameters  
 NAME 13-Mar-AN-2023  
 EXPNO 340  
 PROCNO 1

F2 - Acquisition Parameters  
 Date\_ 20230314  
 Time 3.08  
 INSTRUM spect  
 PROBHD 5 mm PABBO BB  
 PULPROG zgpg30  
 TD 65536  
 SOLVENT CDCl3  
 NS 2048  
 DS 0  
 SWH 24038.461 Hz  
 FIDRES 0.366798 Hz  
 AQ 1.3631488 sec  
 RG 201.48  
 DW 20.800 usec  
 DE 6.50 usec  
 TE 300.0 K  
 D1 1.00000000 sec  
 D11 0.03000000 sec  
 TDO 1

==== CHANNEL f1 =====  
 SFO1 100.6304993 MHz  
 NUC1 13C  
 P1 9.90 usec  
 PLW1 53.00000000 W

==== CHANNEL f2 =====  
 SFO2 400.1621006 MHz  
 NUC2 1H  
 CPDPRG2 waltz16  
 PCPD2 90.00 usec  
 PLW2 13.00000000 W  
 PLW12 0.27963999 W  
 PLW13 0.22651000 W

F2 - Processing parameters  
 SI 32768  
 SF 100.6204380 MHz  
 WDW EM  
 SSB 0  
 LB 1.00 Hz  
 GB 0  
 PC 1.40

Figure S56: <sup>13</sup>C{<sup>1</sup>H} NMR spectrum of 3q

NRJP-379

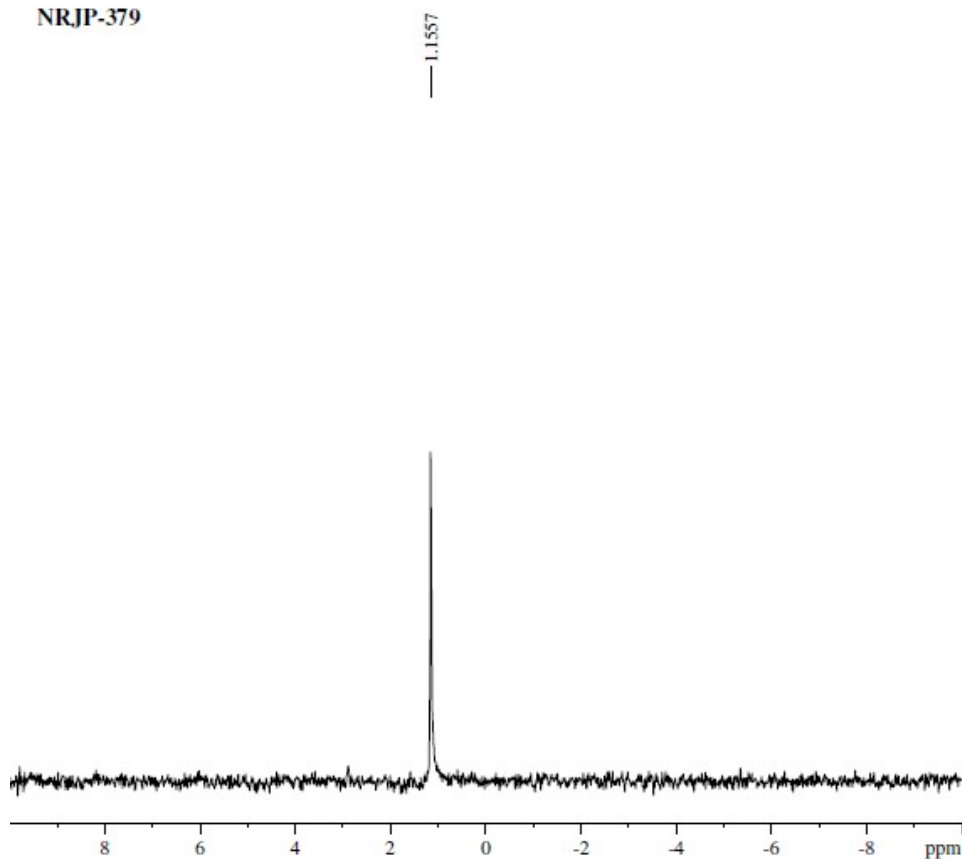Figure S57:  $^{31}\text{P}\{\text{H}\}$  NMR spectrum of 3q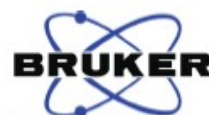

Current Data Parameters  
 NAME 22-Mar-AN-2023  
 EXPNO 310  
 PROCNO 1

F2 - Acquisition Parameters  
 Date\_ 20230322  
 Time 16.03  
 INSTRUM spect  
 PROBHD 5 mm PABBO BB  
 PULPROG zgpg30  
 TD 65536  
 SOLVENT CDCl3  
 NS 16  
 DS 4  
 SWH 64102.563 Hz  
 FIDRES 0.978127 Hz  
 AQ 0.5111808 sec  
 RG 201.48  
 DW 7.800 usec  
 DE 6.50 usec  
 TE 300.1 K  
 D1 2.00000000 sec  
 D11 0.03000000 sec  
 TD0 1

==== CHANNEL f1 ====  
 SFO1 161.9798402 MHz  
 NUC1  $^{31}\text{P}$   
 P1 15.00 usec  
 PLW1 12.00000000 W

==== CHANNEL f2 ====  
 SFO2 400.1621006 MHz  
 NUC2  $^1\text{H}$   
 CPDPRG2 waltz16  
 PCPD2 90.00 usec  
 PLW2 13.00000000 W  
 PLW12 0.27963999 W  
 PLW13 0.22651000 W

F2 - Processing parameters  
 SI 32768  
 SF 161.9879400 MHz  
 WDW EM  
 SSB 0  
 LB 1.00 Hz  
 GB 0  
 PC 1.40

NRJP 371

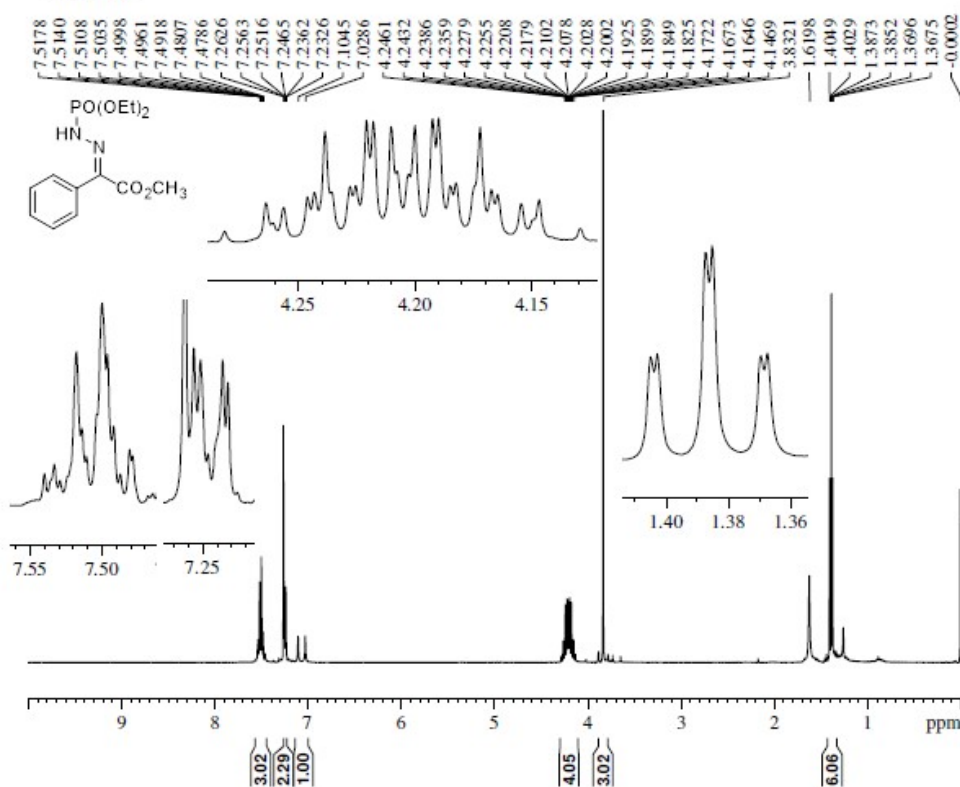Figure S58:  $^1\text{H}$  NMR spectrum of 3r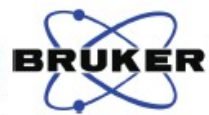

Current Data Parameters  
 NAME 03-May-AN-2023  
 EXPNO 320  
 PROCNO 1

F2 - Acquisition Parameters  
 Date\_ 20230504  
 Time 7.32  
 INSTRUM spect  
 PROBHD 5 mm PABBO BB  
 PULPROG zg30  
 TD 65536  
 SOLVENT CDCl3  
 NS 8  
 DS 0  
 SWH 9615.385 Hz  
 FIDRES 0.146719 Hz  
 AQ 3.4078720 sec  
 RG 145.29  
 DW 52.000 usec  
 DE 6.50 usec  
 TE 300.0 K  
 D1 1.00000000 sec  
 TD0 1

==== CHANNEL f1 ====  
 SFO1 400.1629712 MHz  
 NUC1  $^1\text{H}$   
 P1 13.20 usec  
 PLW1 13.00000000 W

F2 - Processing parameters  
 SI 65536  
 SF 400.1605087 MHz  
 WDW EM  
 SSB 0  
 LB 0.30 Hz  
 GB 0  
 PC 1.00

NRJP371

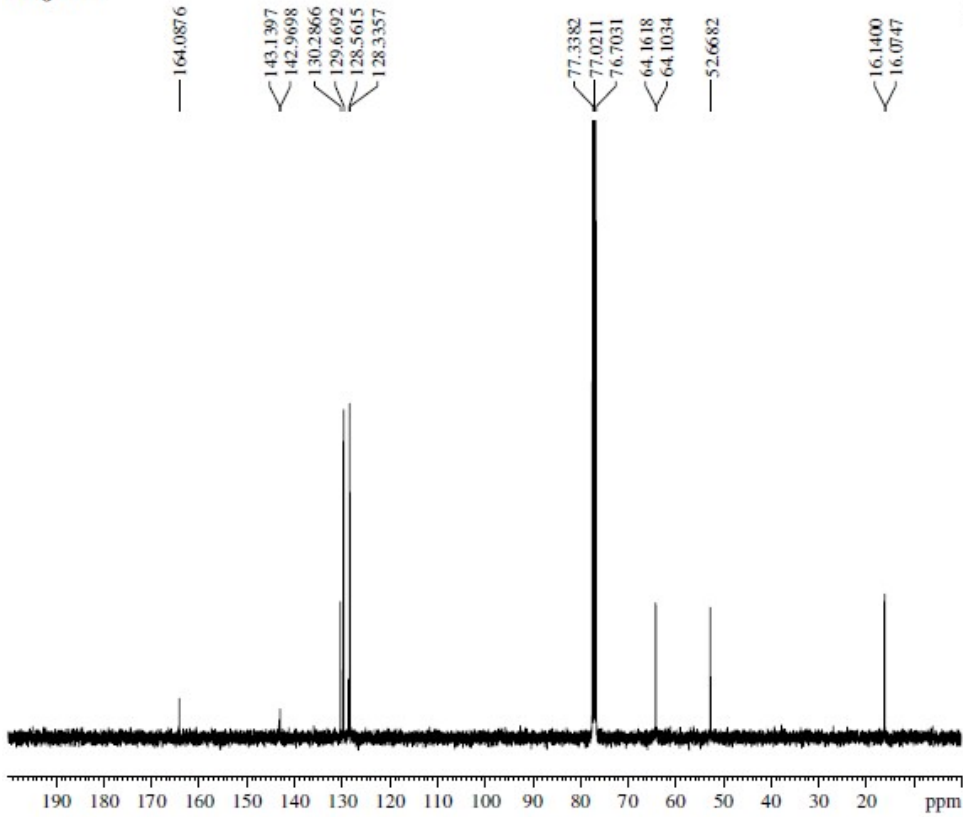

Figure S59:  $^{13}\text{C}\{\text{H}\}$  NMR spectrum of 3r

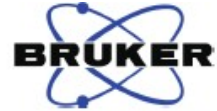

Current Data Parameters  
 NAME 20-FEB-AN-2023  
 EXPNO 430  
 PROCNO 1

F2 - Acquisition Parameters  
 Date\_ 20230221  
 Time 4.34  
 INSTRUM spect  
 PROBHD 5 mm PABBO BH  
 PULPROG zgpg30  
 TD 65536  
 SOLVENT CDCl3  
 NS 2048  
 DS 0  
 SWH 24038.461 Hz  
 FIDRES 0.366798 Hz  
 AQ 1.3631488 sec  
 RG 201.48  
 DW 20.800 usec  
 DE 6.50 usec  
 TE 300.0 K  
 D1 1.00000000 sec  
 D11 0.03000000 sec  
 TD0 1

==== CHANNEL f1 ====  
 SFO1 100.6304993 MHz  
 NUC1  $^{13}\text{C}$   
 P1 9.90 usec  
 PLW1 53.00000000 W

==== CHANNEL f2 ====  
 SFO2 400.1621006 MHz  
 NUC2  $^1\text{H}$   
 CPDPRG[2] waltz16  
 PCPD2 90.00 usec  
 PLW2 13.00000000 W  
 PLW12 0.27963999 W  
 PLW13 0.22651000 W

F2 - Processing parameters  
 SI 32768  
 SF 100.6204380 MHz  
 WDW EM  
 SSB 0  
 LB 1.00 Hz  
 GB 0  
 PC 1.40

NRJP 371

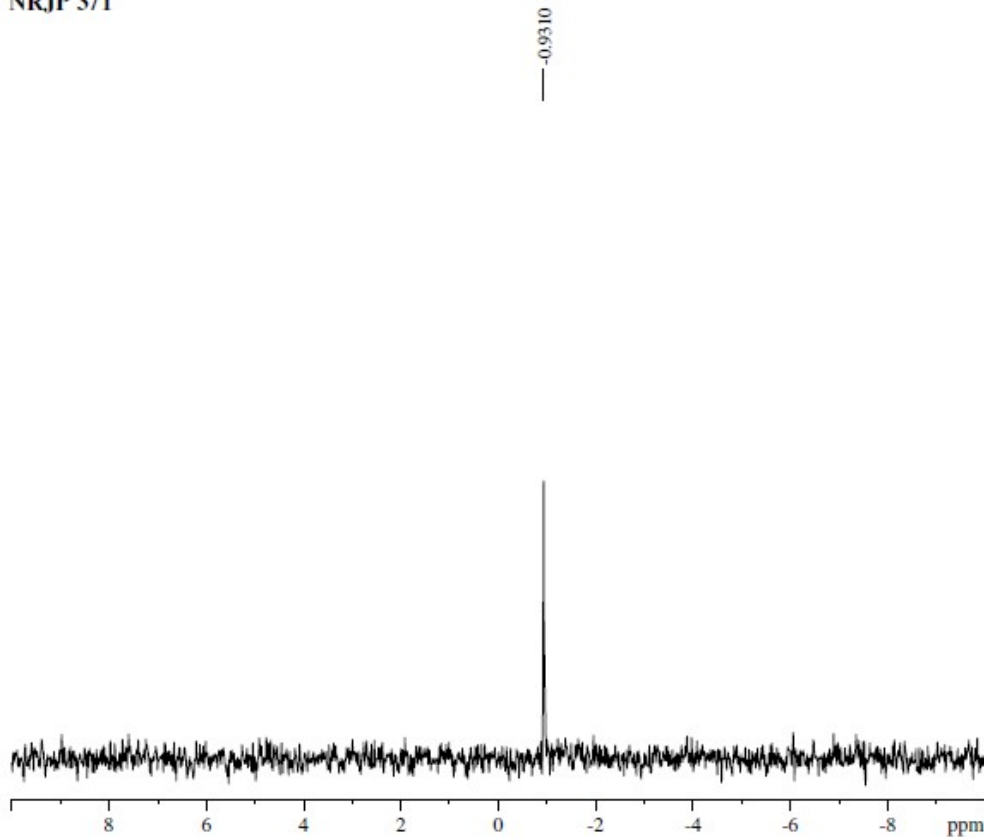

Figure S60:  $^{31}\text{P}\{\text{H}\}$  NMR spectrum of 3r

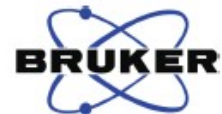

Current Data Parameters  
 NAME 24-Apr-AN-2023  
 EXPNO 410  
 PROCNO 1

F2 - Acquisition Parameters  
 Date\_ 20230424  
 Time 22.23  
 INSTRUM spect  
 PROBHD 5 mm PABBO BH  
 PULPROG zgpg30  
 TD 65536  
 SOLVENT CDCl3  
 NS 16  
 DS 4  
 SWH 64102.563 Hz  
 FIDRES 0.978127 Hz  
 AQ 0.5111808 sec  
 RG 201.48  
 DW 7.800 usec  
 DE 6.50 usec  
 TE 300.1 K  
 D1 2.00000000 sec  
 D11 0.03000000 sec  
 TD0 1

==== CHANNEL f1 ====  
 SFO1 161.9798402 MHz  
 NUC1  $^{31}\text{P}$   
 P1 15.00 usec  
 PLW1 12.00000000 W

==== CHANNEL f2 ====  
 SFO2 400.1621006 MHz  
 NUC2  $^1\text{H}$   
 CPDPRG[2] waltz16  
 PCPD2 90.00 usec  
 PLW2 13.00000000 W  
 PLW12 0.27963999 W  
 PLW13 0.22651000 W

F2 - Processing parameters  
 SI 32768  
 SF 161.9879400 MHz  
 WDW EM  
 SSB 0  
 LB 1.00 Hz  
 GB 0  
 PC 1.40

NRJP-375

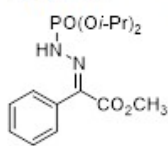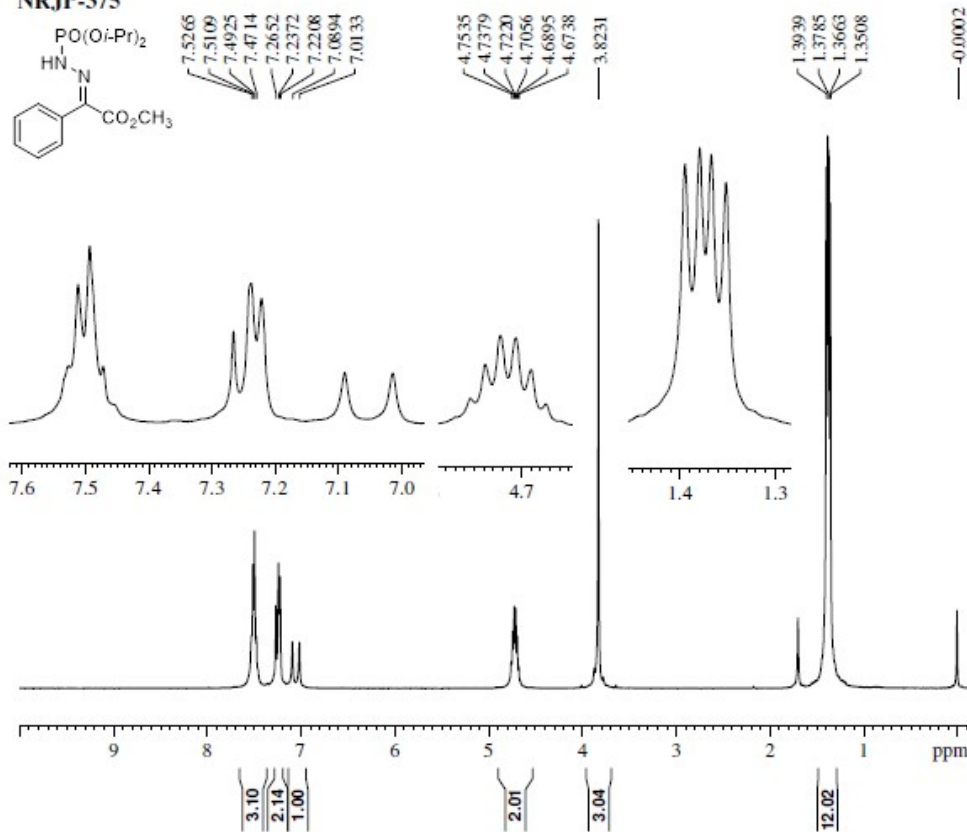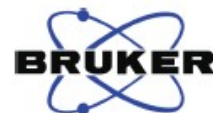

Current Data Parameters  
 NAME 27-Apr-FN-2023  
 EXPNO 500  
 PROCNO 1

F2 - Acquisition Parameters  
 Date\_ 20230427  
 Time 12.50  
 INSTRUM spect  
 PROBHD 5 mm PABBO BB/  
 PULPROG zg30  
 TD 65536  
 SOLVENT CDCl3  
 NS 8  
 DS 0  
 SWH 9615.385 Hz  
 FIDRES 0.146719 Hz  
 AQ 3.4078720 sec  
 RG 114.26  
 DW 52.000 usec  
 DE 6.50 usec  
 TE 300.0 K  
 D1 1.00000000 sec  
 TD0 1

==== CHANNEL f1 ====  
 SFO1 400.1629712 MHz  
 NUC1 1H  
 P1 13.20 usec  
 PLW1 13.00000000 W

F2 - Processing parameters  
 SI 65536  
 SF 400.1605074 MHz  
 WDW EM  
 SSB 0  
 LB 0.30 Hz  
 GB 0  
 PC 1.00

Figure S61: <sup>1</sup>H NMR spectrum of 3s

NRJP375

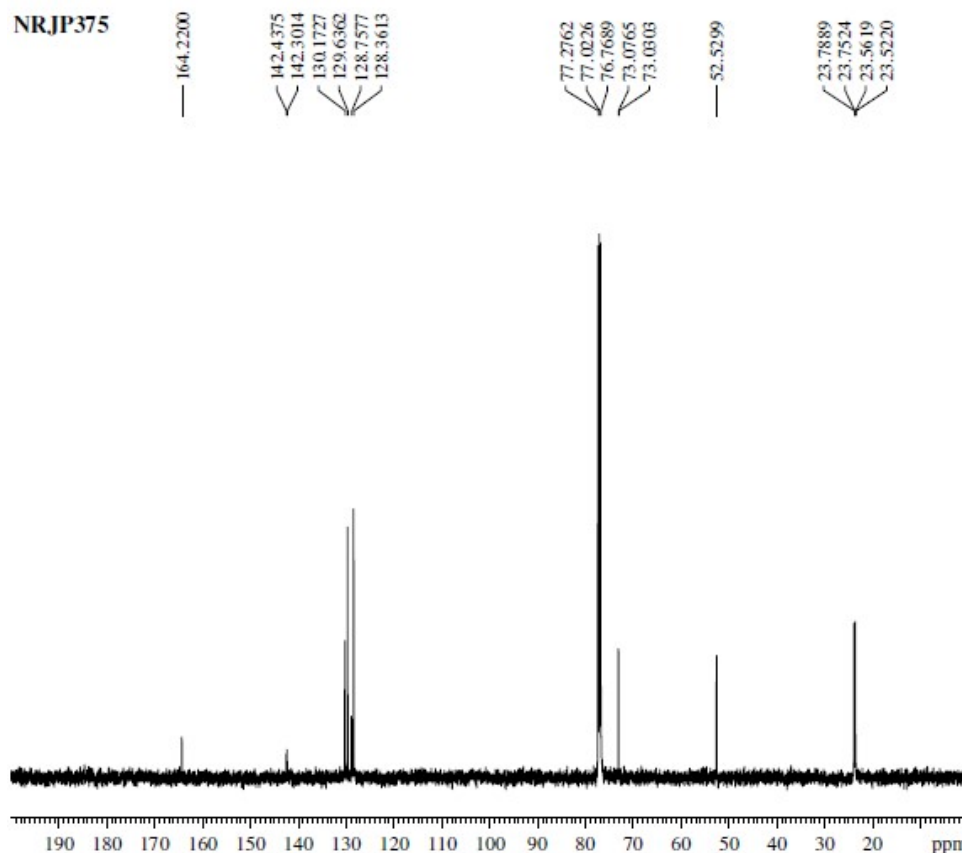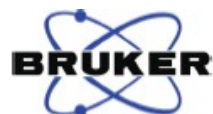

Current Data Parameters  
 NAME 27-Apr-FN-2023  
 EXPNO 510  
 PROCNO 1

F2 - Acquisition Parameters  
 Date\_ 20230427  
 Time 11.08  
 INSTRUM spect  
 PROBHD 5 mm PATX1 1H/  
 PULPROG zgpg30  
 TD 65536  
 SOLVENT CDCl3  
 NS 2048  
 DS 4  
 SWH 29761.904 Hz  
 FIDRES 0.454131 Hz  
 AQ 1.1010048 sec  
 RG 107.78  
 DW 16.800 usec  
 DE 6.50 usec  
 TE 303.0 K  
 D1 1.00000000 sec  
 D11 0.03000000 sec  
 TD0 1

==== CHANNEL f1 ====  
 SFO1 125.9077573 MHz  
 NUC1 13C  
 P1 9.23 usec  
 PLW1 244.00000000 W

==== CHANNEL f2 ====  
 SFO2 500.6783527 MHz  
 NUC2 1H  
 CPDPRG2 walz16  
 PCPD2 80.00 usec  
 PLW2 13.60000038 W  
 PLW12 0.08840500 W  
 PLW13 0.05657900 W

F2 - Processing parameters  
 SI 32768  
 SF 125.8951680 MHz  
 WDW EM  
 SSB 0  
 LB 2.00 Hz  
 GB 0  
 PC 1.40

Figure S62: <sup>13</sup>C{H} NMR spectrum of 3s

NRJP-375

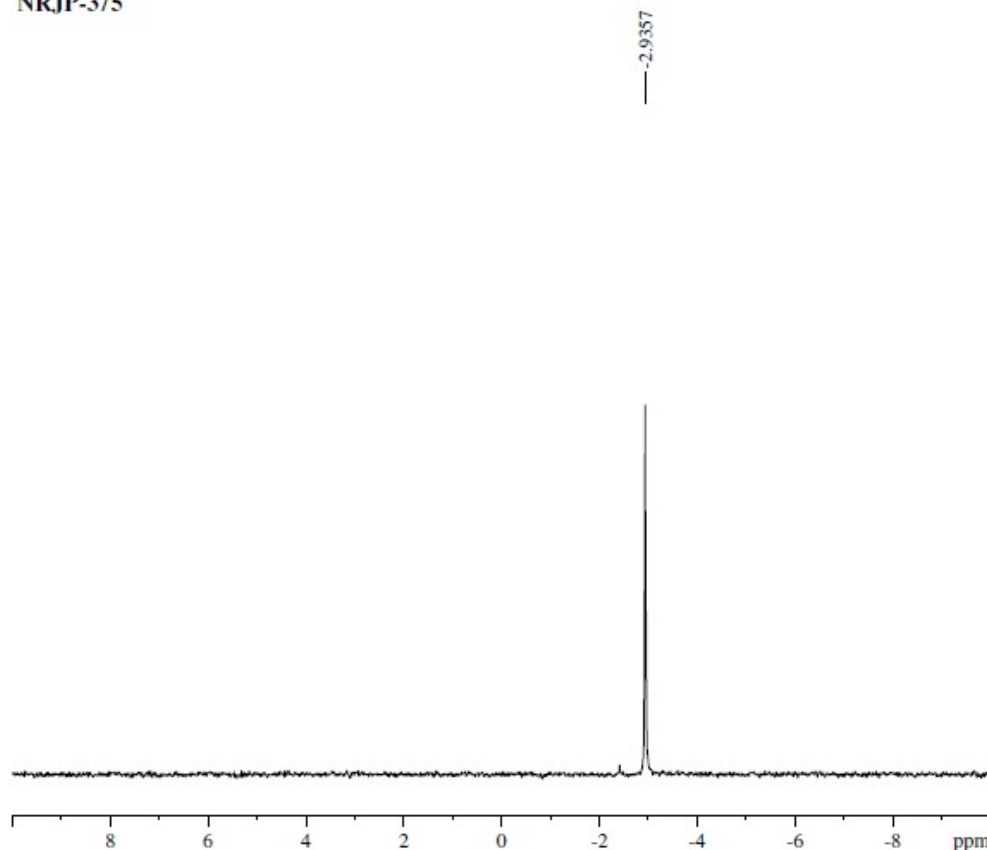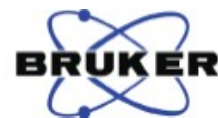

Current Data Parameters  
 NAME 21-Mar-AN-2023  
 EXPNO 430  
 PROCNO 1

F2 - Acquisition Parameters  
 Date\_ 20230321  
 Time 21.11  
 INSTRUM spect  
 PROBHD 5 mm PABBO BB  
 PULPROG zgpg30  
 TD 65536  
 SOLVENT CDCl3  
 NS 16  
 DS 4  
 SWH 64102.563 Hz  
 FIDRES 0.978127 Hz  
 AQ 0.5111808 sec  
 RG 201.48  
 DW 7.800 usec  
 DE 6.50 usec  
 TE 300.1 K  
 D1 2.00000000 sec  
 D11 0.03000000 sec  
 TDO 1

==== CHANNEL f1 ====  
 SFO1 161.9798402 MHz  
 NUC1 31P  
 P1 15.00 usec  
 PLW1 12.00000000 W

==== CHANNEL f2 ====  
 SFO2 400.1621006 MHz  
 NUC2 1H  
 CPDPRG2 waltz16  
 PCPD2 90.00 usec  
 PLW2 13.00000000 W  
 PLW12 0.27963999 W  
 PLW13 0.22651000 W

F2 - Processing parameters  
 SI 32768  
 SF 161.9879400 MHz  
 WDW EM  
 SSB 0  
 LB 1.00 Hz  
 GB 0  
 PC 1.40

Figure S63:  $^{31}\text{P}\{\text{H}\}$  NMR spectrum of 3s

NRJP-507

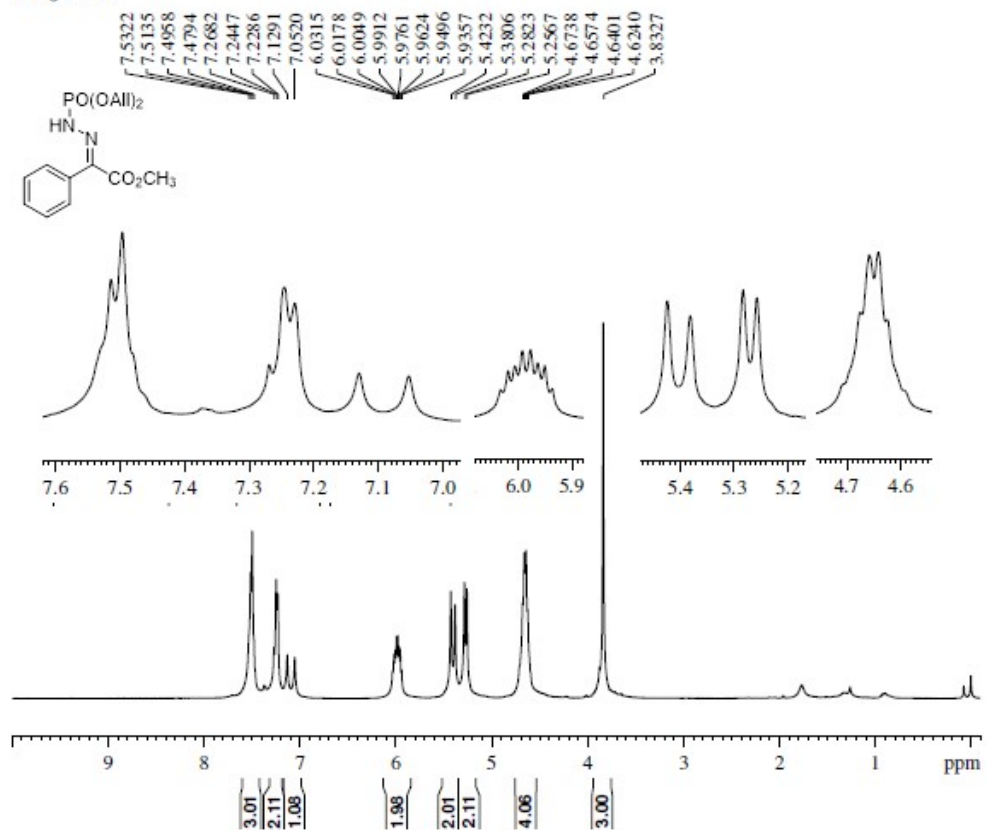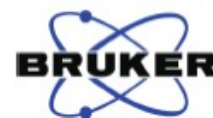

Current Data Parameters  
 NAME 19-DEC-AN-2023  
 EXPNO 310  
 PROCNO 1

F2 - Acquisition Parameters  
 Date\_ 20231219  
 Time 17.11  
 INSTRUM spect  
 PROBHD 5 mm PABBO BB  
 PULPROG zg30  
 TD 65536  
 SOLVENT CDCl3  
 NS 8  
 DS 0  
 SWH 9615.385 Hz  
 FIDRES 0.146719 Hz  
 AQ 3.4078720 sec  
 RG 89.7  
 DW 52.000 usec  
 DE 6.50 usec  
 TE 300.0 K  
 D1 1.00000000 sec  
 TDO 1

==== CHANNEL f1 ====  
 SFO1 400.1629712 MHz  
 NUC1 1H  
 P1 13.20 usec  
 PLW1 13.00000000 W

F2 - Processing parameters  
 SI 65536  
 SF 400.1605065 MHz  
 WDW EM  
 SSB 0  
 LB 0.30 Hz  
 GB 0  
 PC 1.00

Figure S64:  $^1\text{H}$  NMR spectrum of 3t

NRJP-507

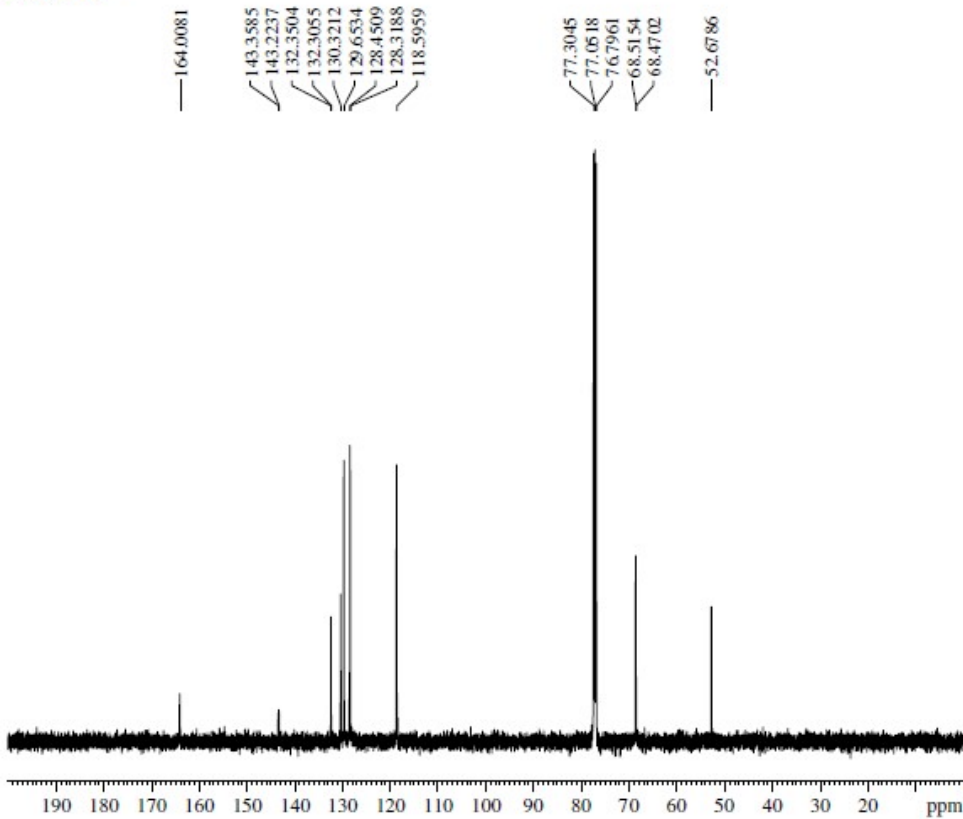

Figure S65:  $^{13}\text{C}\{\text{H}\}$  NMR spectrum of 3t

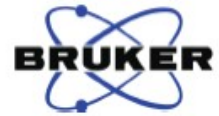

Current Data Parameters  
 NAME 19-DEC-AN-2023  
 EXPNO 330  
 PROCNO 1

F2 - Acquisition Parameters  
 Date\_ 20231219  
 Time 13.36  
 INSTRUM spect  
 PROBHD 5 mm PATXI 1H/  
 PULPROG zgpg30  
 TD 65536  
 SOLVENT CDCl3  
 NS 2048  
 DS 0  
 SWH 29761.904 Hz  
 FIDRES 0.454131 Hz  
 AQ 1.1010048 sec  
 RG 107.78  
 DW 16.800 usec  
 DE 6.50 usec  
 TE 300.0 K  
 D1 1.0000000 sec  
 D11 0.03000000 sec  
 TD0 1

==== CHANNEL f1 =====  
 SFO1 125.9077573 MHz  
 NUC1  $^{13}\text{C}$   
 P1 9.23 usec  
 PLW1 244.0000000 W

==== CHANNEL f2 =====  
 SFO2 500.6783527 MHz  
 NUC2  $^1\text{H}$   
 CPDPRG2 waltz16  
 PCPD2 80.00 usec  
 PLW2 13.60000038 W  
 PLW12 0.08840500 W  
 PLW13 0.05657900 W

F2 - Processing parameters  
 SI 32768  
 SF 125.8951680 MHz  
 WDW EM  
 SSB 0  
 LB 1.00 Hz  
 GB 0  
 PC 1.40

NRJP-507

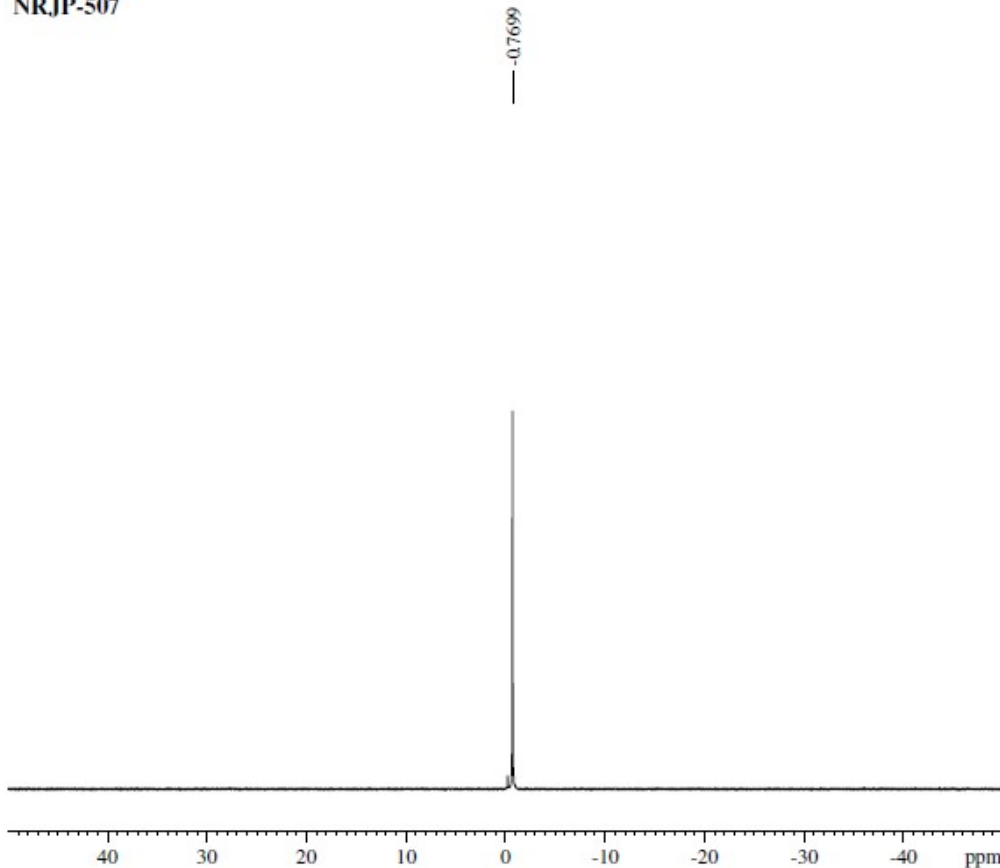

Figure S66:  $^{31}\text{P}\{\text{H}\}$  NMR spectrum of 3t

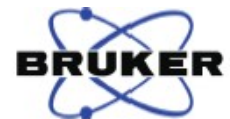

Current Data Parameters  
 NAME 19-DEC-AN-2023  
 EXPNO 320  
 PROCNO 1

F2 - Acquisition Parameters  
 Date\_ 20231219  
 Time 17.13  
 INSTRUM spect  
 PROBHD 5 mm PABBO BB/  
 PULPROG zgpg30  
 TD 65536  
 SOLVENT CDCl3  
 NS 16  
 DS 4  
 SWH 64102.563 Hz  
 FIDRES 0.978127 Hz  
 AQ 0.5111808 sec  
 RG 201.48  
 DW 7.800 usec  
 DE 6.50 usec  
 TE 300.1 K  
 D1 2.0000000 sec  
 D11 0.03000000 sec  
 TD0 1

==== CHANNEL f1 =====  
 SFO1 161.9798402 MHz  
 NUC1  $^{31}\text{P}$   
 P1 15.00 usec  
 PLW1 12.0000000 W

==== CHANNEL f2 =====  
 SFO2 400.1621006 MHz  
 NUC2  $^1\text{H}$   
 CPDPRG2 waltz16  
 PCPD2 90.00 usec  
 PLW2 13.00000000 W  
 PLW12 0.27963999 W  
 PLW13 0.22651000 W

F2 - Processing parameters  
 SI 32768  
 SF 161.9879400 MHz  
 WDW EM  
 SSB 0  
 LB 1.00 Hz  
 GB 0  
 PC 1.40

NRJP-527

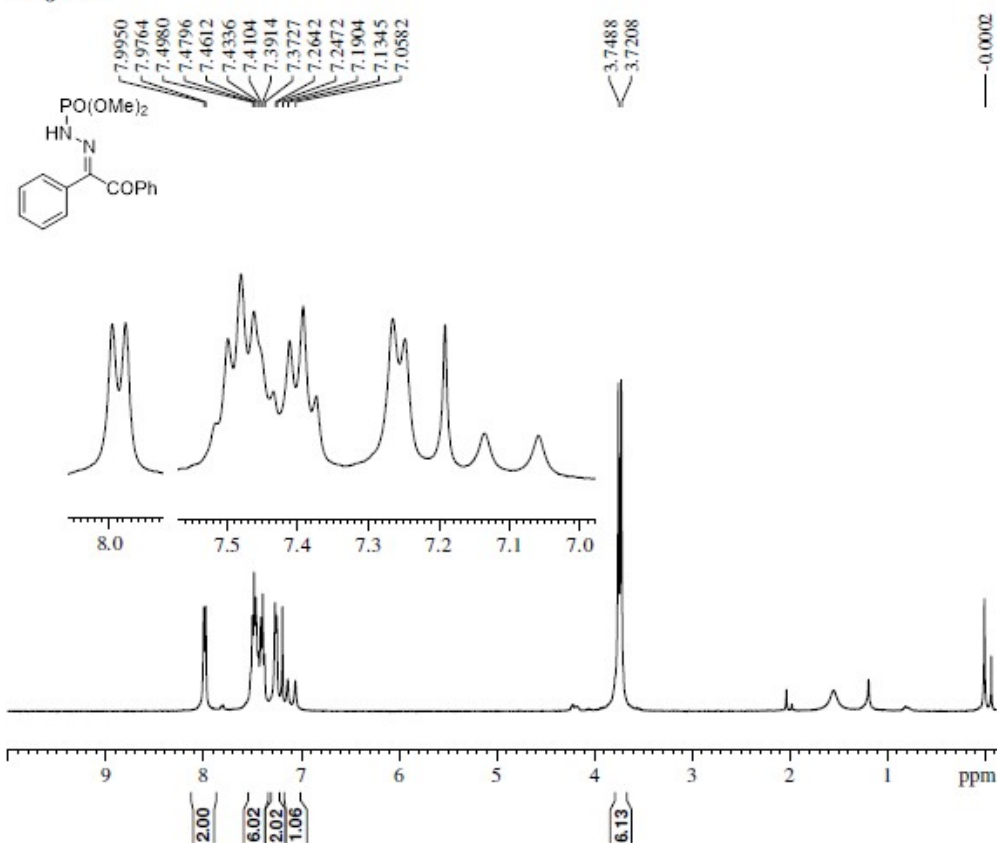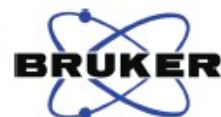

Current Data Parameters  
 NAME 19-FEB-AN-2023  
 EXPNO 360  
 PROCNO 1

F2 - Acquisition Parameters  
 Date\_ 20240219  
 Time 21.04  
 INSTRUM spect  
 PROBHD 5 mm PABBO BB/  
 PULPROG zg30  
 TD 65536  
 SOLVENT CDCl3  
 NS 8  
 DS 0  
 SWH 9615.385 Hz  
 FIDRES 0.146719 Hz  
 AQ 3.4078720 sec  
 RG 145.29  
 DW 52.000 usec  
 DE 6.50 usec  
 TE 300.0 K  
 D1 1.0000000 sec  
 TDO 1

CHANNEL f1  
 SFO1 400.1629712 MHz  
 NUC1 1H  
 P1 13.20 usec  
 PLW1 13.00000000 W

F2 - Processing parameters  
 SI 65536  
 SF 400.1605377 MHz  
 WDW EM  
 SSB 0  
 LB 0.30 Hz  
 GB 0  
 PC 1.00

Figure S67: <sup>1</sup>H NMR spectrum of 3u

NRJP-527

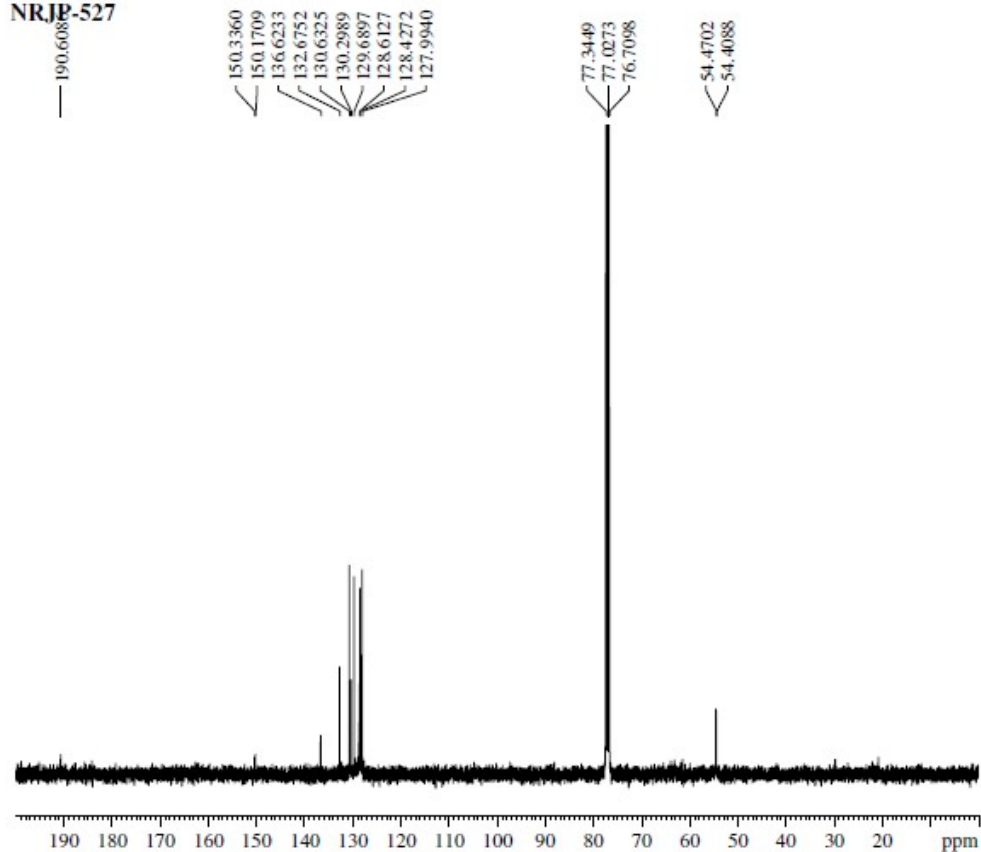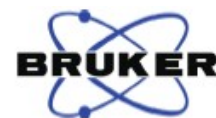

Current Data Parameters  
 NAME 22-FEB-AN-2024  
 EXPNO 320  
 PROCNO 1

F2 - Acquisition Parameters  
 Date\_ 20240222  
 Time 17.17  
 INSTRUM spect  
 PROBHD 5 mm PABBO BB/  
 PULPROG zgpg30  
 TD 65536  
 SOLVENT CDCl3  
 NS 575  
 DS 4  
 SWH 24038.461 Hz  
 FIDRES 0.366798 Hz  
 AQ 1.3631488 sec  
 RG 201.48  
 DW 20.800 usec  
 DE 6.50 usec  
 TE 300.0 K  
 D1 1.0000000 sec  
 D11 0.0300000 sec  
 TDO 1

CHANNEL f1  
 SFO1 100.6204380 MHz  
 NUC1 13C  
 P1 9.90 usec  
 PLW1 53.00000000 W

CHANNEL f2  
 SFO2 400.1621006 MHz  
 NUC2 1H  
 CPDPRG2 waltz16  
 PCPD2 90.00 usec  
 PLW2 13.00000000 W  
 PLW12 0.27963999 W  
 PLW13 0.22651000 W

F2 - Processing parameters  
 SI 32768  
 SF 100.6204380 MHz  
 WDW EM  
 SSB 0  
 LB 1.00 Hz  
 GB 0  
 PC 1.40

Figure S68: <sup>13</sup>C{<sup>1</sup>H} NMR spectrum of 3u



NRJP-527

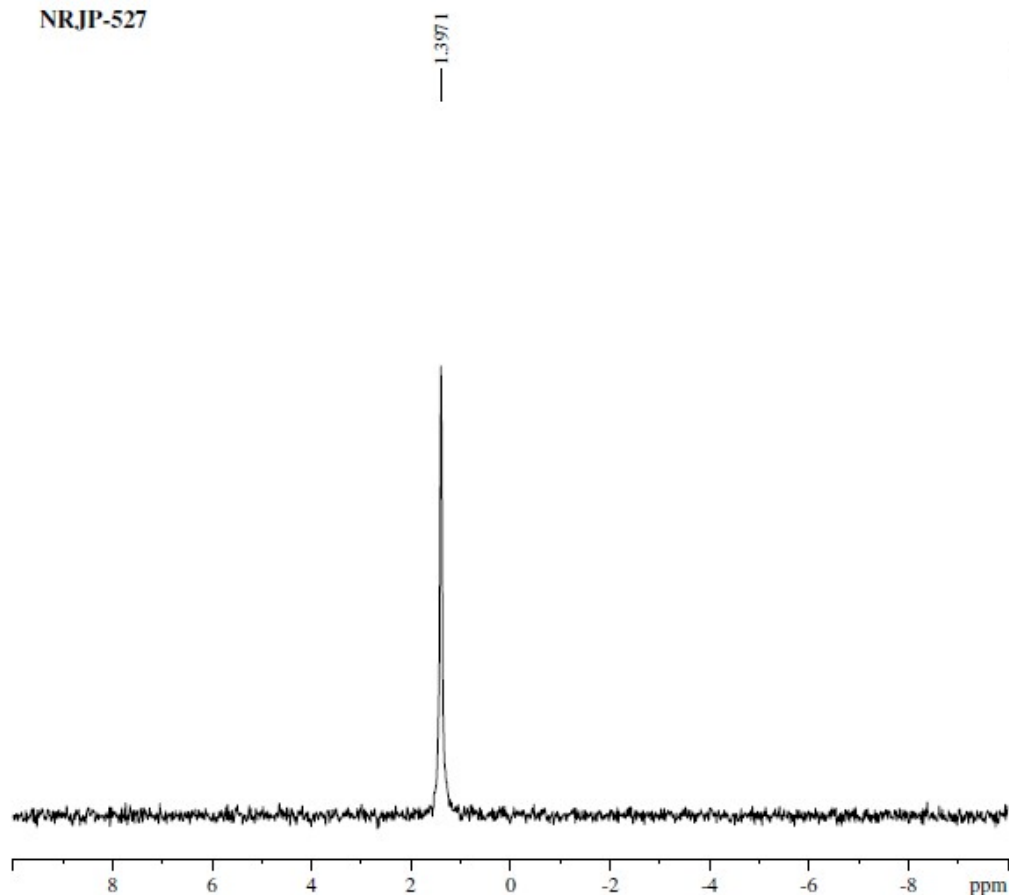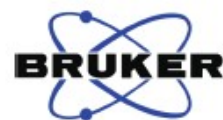

Current Data Parameters  
 NAME 21-FEB-FN-2024  
 EXPNO 480  
 PROCNO 1

F2 - Acquisition Parameters  
 Date\_ 20240221  
 Time 12.03  
 INSTRUM spect  
 PROBHD 5 mm PABBO BB/  
 PULPROG zgpg30  
 TD 65536  
 SOLVENT CDCl3  
 NS 16  
 DS 4  
 SWH 64102.563 Hz  
 FIDRES 0.978127 Hz  
 AQ 0.5111808 sec  
 RG 201.48  
 DW 7.800 usec  
 DE 6.50 usec  
 TE 300.1 K  
 D1 2.0000000 sec  
 D11 0.0300000 sec  
 TD0 1

==== CHANNEL f1 ====  
 SFO1 161.9798402 MHz  
 NUC1 31P  
 P1 15.00 usec  
 PLW1 12.0000000 W

==== CHANNEL f2 ====  
 SFO2 400.1621006 MHz  
 NUC2 1H  
 CPDPRG2 waltz16  
 PCPD2 90.00 usec  
 PLW2 13.0000000 W  
 PLW12 0.27963999 W  
 PLW13 0.22651000 W

F2 - Processing parameters  
 SI 32768  
 SF 161.9879400 MHz  
 WDW EM  
 SSB 0  
 LB 1.00 Hz  
 GB 0  
 PC 1.40

Figure S69:  $^{31}\text{P}\{\text{H}\}$  NMR spectrum of 3u

MRJP-450

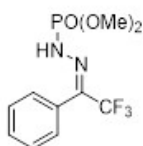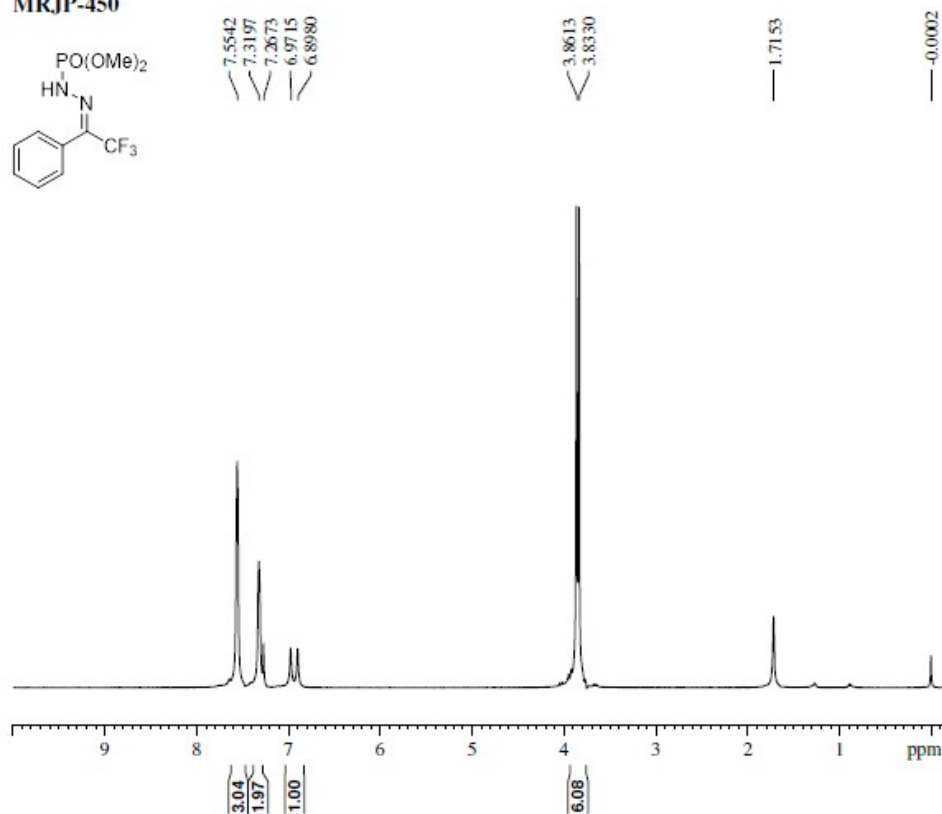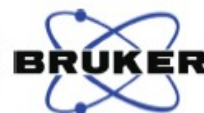

Current Data Parameters  
 NAME 25-Jul--AN-2023  
 EXPNO 460  
 PROCNO 1

F2 - Acquisition Parameters  
 Date\_ 20230726  
 Time 0.07  
 INSTRUM spect  
 PROBHD 5 mm PABBO BB/  
 PULPROG zg30  
 TD 65536  
 SOLVENT CDCl3  
 NS 8  
 DS 0  
 SWH 9615.385 Hz  
 FIDRES 0.146719 Hz  
 AQ 3.4078720 sec  
 RG 114.26  
 DW 52.000 usec  
 DE 6.50 usec  
 TE 300.0 K  
 D1 1.0000000 sec  
 TD0 1

==== CHANNEL f1 ====  
 SFO1 400.1629712 MHz  
 NUC1 1H  
 P1 13.20 usec  
 PLW1 13.0000000 W

F2 - Processing parameters  
 SI 65536  
 SF 400.1605065 MHz  
 WDW EM  
 SSB 0  
 LB 0.30 Hz  
 GB 0  
 PC 1.00

Figure S70:  $^1\text{H}$  NMR spectrum of 3v

NRJP-450

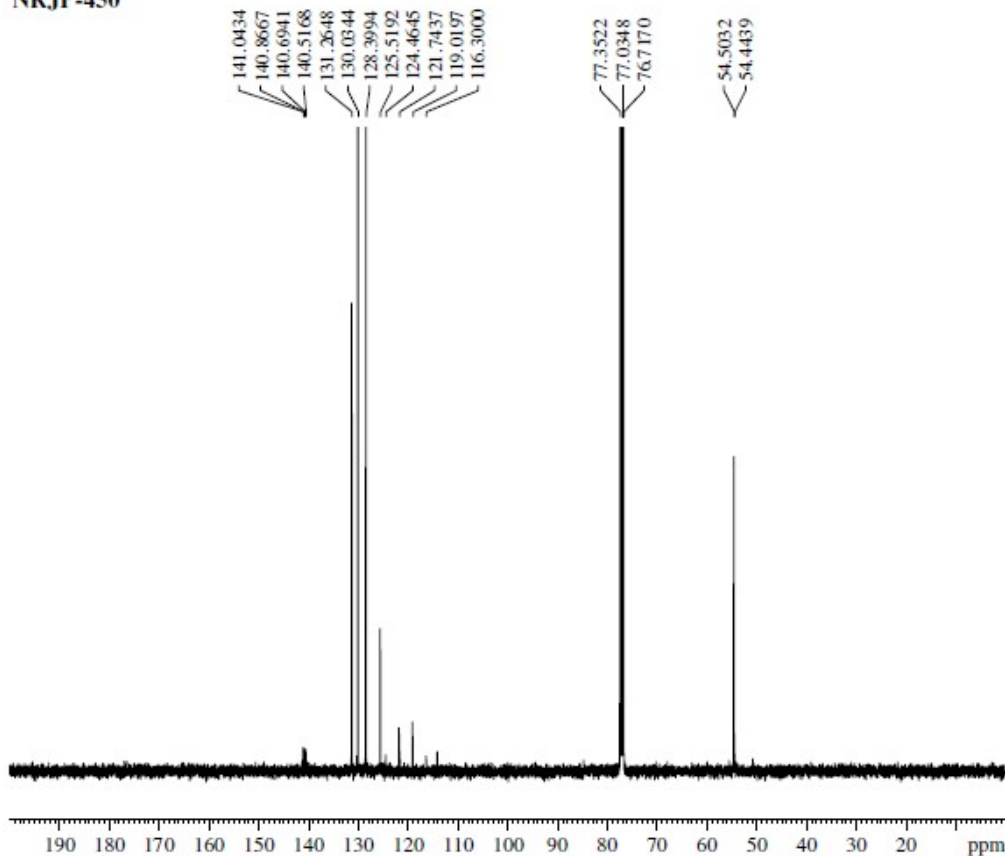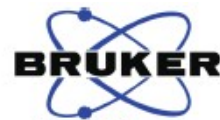

Current Data Parameters  
 NAME 27-JUL-AN-2023  
 EXPNO 320  
 PROCNO 1

F2 - Acquisition Parameters  
 Date\_ 20230727  
 Time 19.23  
 INSTRUM spect  
 PROBHD 5 mm PABBO BBV  
 PULPROG zgpg30  
 TD 65536  
 SOLVENT CDCl3  
 NS 2048  
 DS 4  
 SWH 24038.461 Hz  
 FIDRES 0.366798 Hz  
 AQ 1.3631488 sec  
 RG 201.48  
 DW 20.800 usec  
 DE 6.50 usec  
 TE 300.0 K  
 D1 1.00000000 sec  
 D11 0.03000000 sec  
 TDO 1

==== CHANNEL f1 ====  
 SFO1 100.6304993 MHz  
 NUC1 13C  
 P1 9.90 usec  
 PLW1 53.00000000 W

==== CHANNEL f2 ====  
 SFO2 400.1621006 MHz  
 NUC2 1H  
 CPDPRG[2] waltz16  
 PCPD2 90.00 usec  
 PLW2 13.00000000 W  
 PLW12 0.27963999 W  
 PLW13 0.22651000 W

F2 - Processing parameters  
 SI 32768  
 SF 100.6204380 MHz  
 WDW EM  
 SSB 0  
 LB 1.00 Hz  
 GB 0  
 PC 1.40

Figure S71:  $^{13}\text{C}\{\text{H}\}$  NMR spectrum of 3v

NRJP450

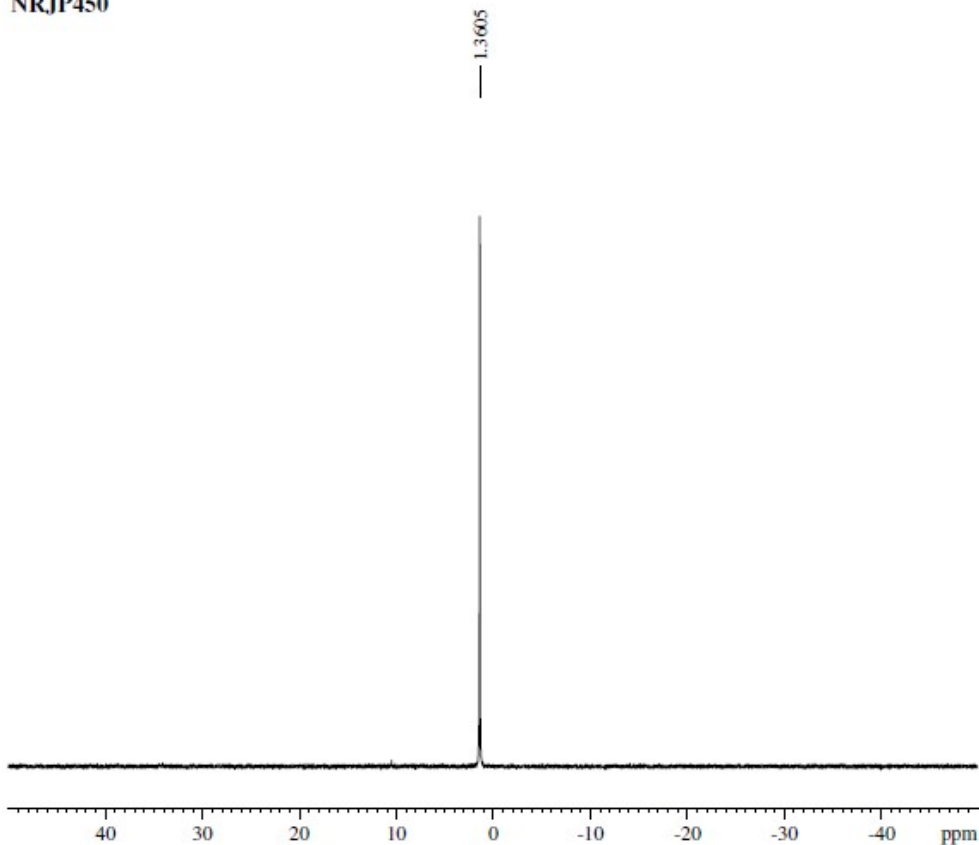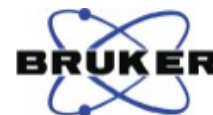

Current Data Parameters  
 NAME 26-JUL-AN-2023  
 EXPNO 360  
 PROCNO 1

F2 - Acquisition Parameters  
 Date\_ 20230726  
 Time 17.49  
 INSTRUM spect  
 PROBHD 5 mm PABBO BBV  
 PULPROG zgpg30  
 TD 65536  
 SOLVENT CDCl3  
 NS 16  
 DS 4  
 SWH 64102.563 Hz  
 FIDRES 0.978127 Hz  
 AQ 0.5111808 sec  
 RG 201.48  
 DW 7.800 usec  
 DE 6.50 usec  
 TE 300.2 K  
 D1 1.00000000 sec  
 D11 0.03000000 sec  
 TDO 1

==== CHANNEL f1 ====  
 SFO1 161.9798402 MHz  
 NUC1 31P  
 P1 15.00 usec  
 PLW1 12.00000000 W

==== CHANNEL f2 ====  
 SFO2 400.1621006 MHz  
 NUC2 1H  
 CPDPRG[2] waltz16  
 PCPD2 90.00 usec  
 PLW2 13.00000000 W  
 PLW12 0.27963999 W  
 PLW13 0.22651000 W

F2 - Processing parameters  
 SI 32768  
 SF 161.9879400 MHz  
 WDW EM  
 SSB 0  
 LB 1.00 Hz  
 GB 0  
 PC 1.40

Figure S72:  $^{31}\text{P}\{\text{H}\}$  NMR spectrum of 3v

NRJP450

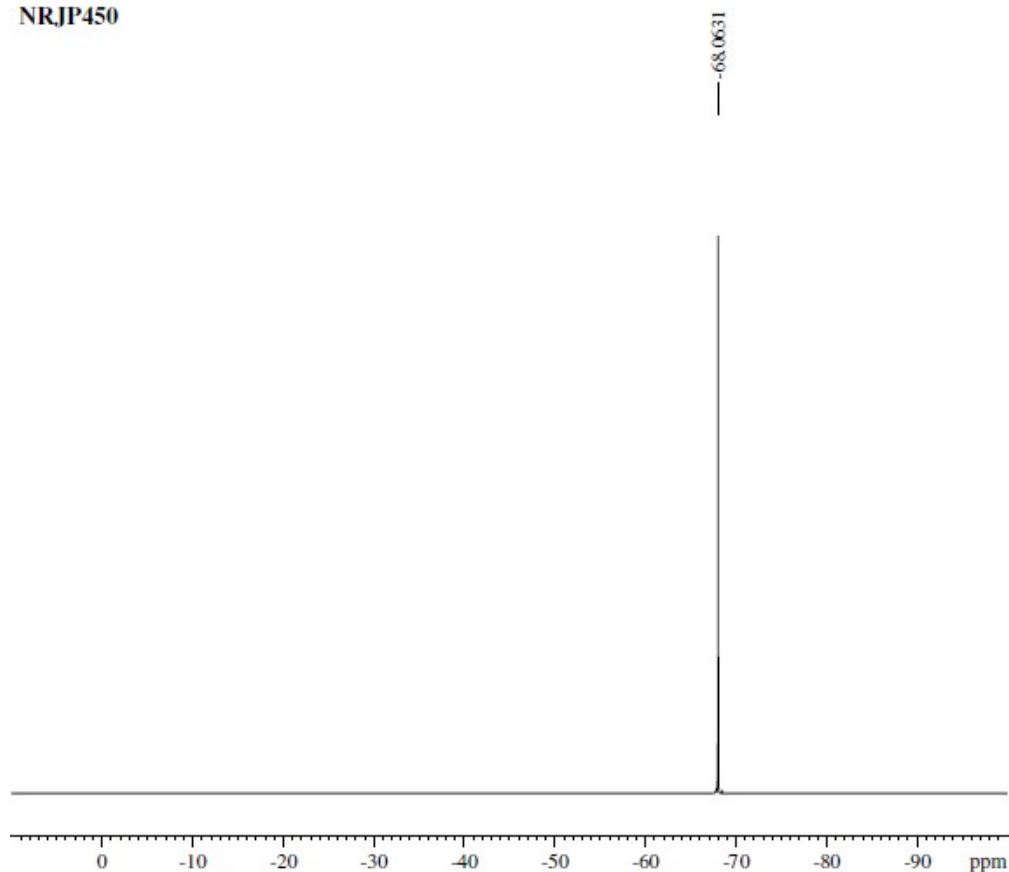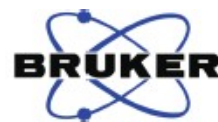

Current Data Parameters  
 NAME 26-JUL-AN-2023  
 EXPNO 350  
 PROCNO 1

F2 - Acquisition Parameters  
 Date\_ 20230726  
 Time 17.48  
 INSTRUM spect  
 PROBHD 5 mm PABBO BB/  
 PULPROG zgpg30  
 TD 131072  
 SOLVENT CDCl3  
 NS 16  
 DS 4  
 SWH 89285.711 Hz  
 FIDRES 0.681196 Hz  
 AQ 0.734032 sec  
 RG 201.48  
 DW 5.600 usec  
 DE 6.50 usec  
 TE 300.0 K  
 D1 1.00000000 sec  
 D11 0.03000000 sec  
 D12 0.00002000 sec  
 TD0 1

==== CHANNEL f1 ====  
 SFO1 376.4894122 MHz  
 NUC1 19F  
 P1 15.00 usec  
 PLW1 21.00000000 W

==== CHANNEL f2 ====  
 SFO2 400.1621006 MHz  
 NUC2 1H  
 CPDPRG2 walz16  
 PCPD2 90.00 usec  
 PLW2 13.00000000 W  
 PLW12 0.27963999 W

F2 - Processing parameters  
 SI 65536  
 SF 376.5270650 MHz  
 WDW EM  
 SSB 0  
 LB 0.30 Hz  
 GB 0  
 PC 1.00

Figure S73:  $^{19}\text{F}\{\text{H}\}$  NMR spectrum of 3v

NRJP-455

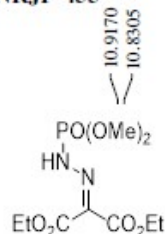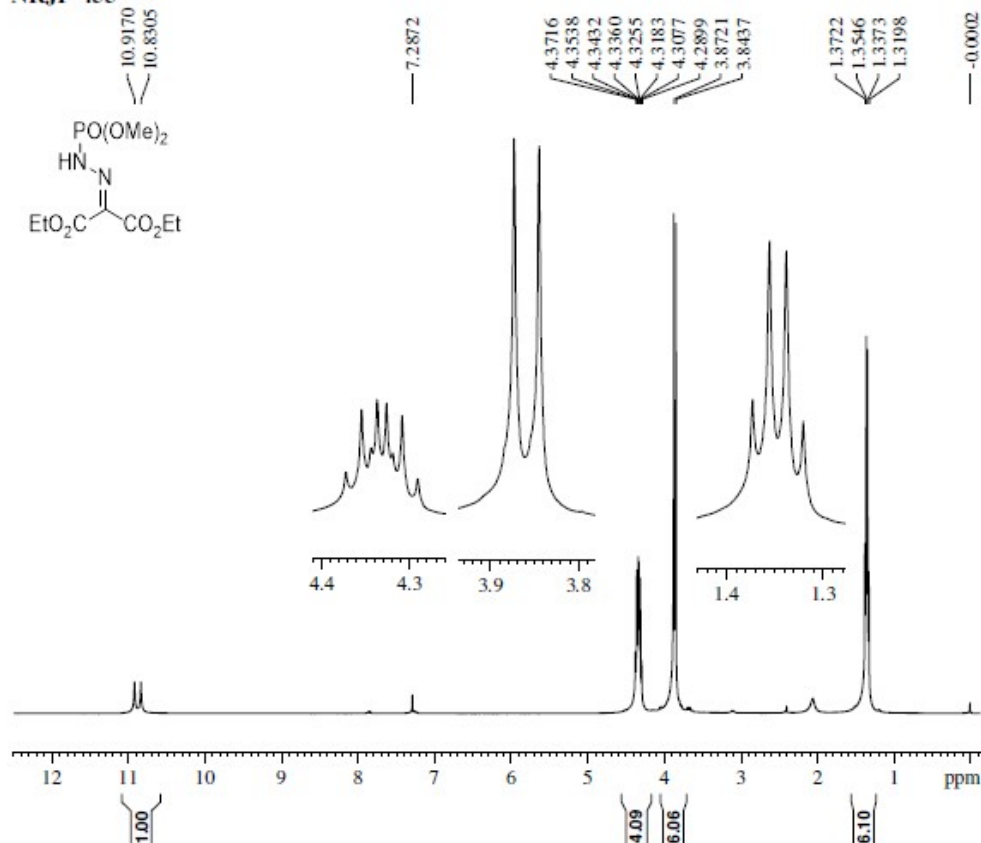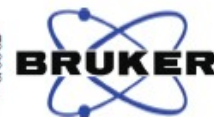

Current Data Parameters  
 NAME 07-AUG-AN-2023  
 EXPNO 310  
 PROCNO 1

F2 - Acquisition Parameters  
 Date\_ 20230807  
 Time 17.09  
 INSTRUM spect  
 PROBHD 5 mm PABBO BB/  
 PULPROG zg30  
 TD 65536  
 SOLVENT CDCl3  
 NS 8  
 DS 0  
 SWH 9615.385 Hz  
 FIDRES 0.146719 Hz  
 AQ 3.4078720 sec  
 RG 73.53  
 DW 52.000 usec  
 DE 6.50 usec  
 TE 300.0 K  
 D1 1.00000000 sec  
 TD0 1

==== CHANNEL f1 ====  
 SFO1 400.1629712 MHz  
 NUC1 1H  
 P1 13.20 usec  
 PLW1 13.00000000 W

F2 - Processing parameters  
 SI 65536  
 SF 400.1604984 MHz  
 WDW EM  
 SSB 0  
 LB 0.30 Hz  
 GB 0  
 PC 1.00

Figure S74:  $^1\text{H}$  NMR spectrum of 3v

NRJP-455

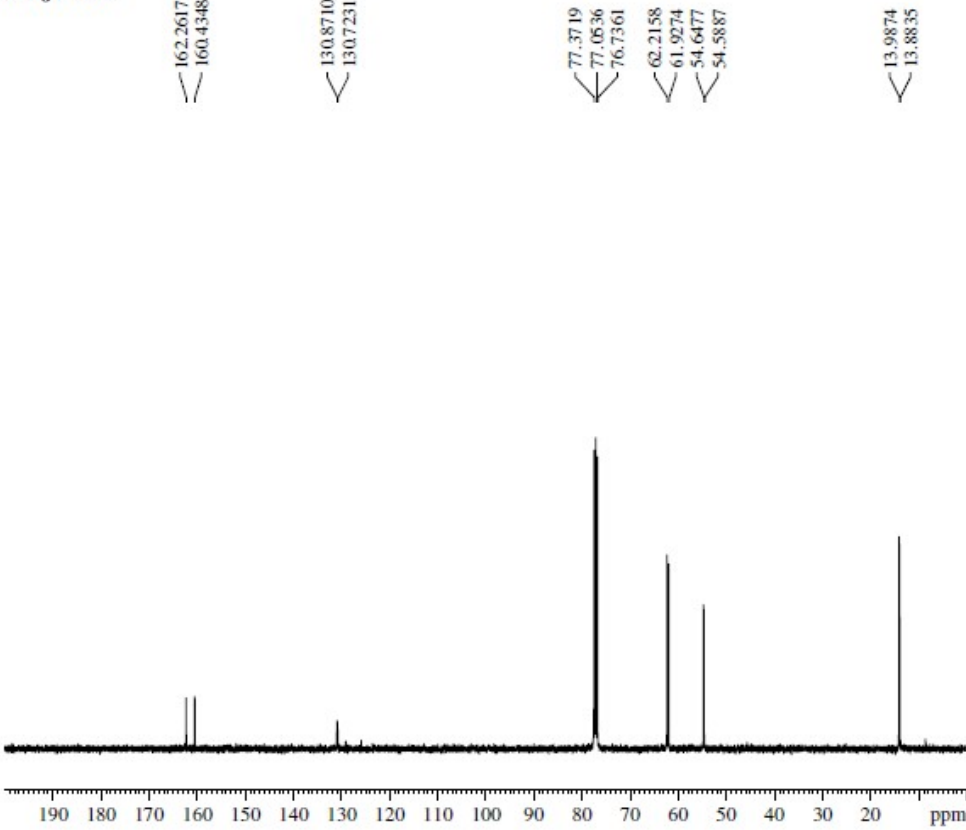

Figure S75:  $^{13}\text{C}\{\text{H}\}$  NMR spectrum of 3w

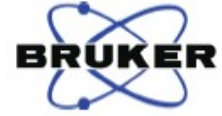

Current Data Parameters  
 NAME 08-AUG-AN-2023  
 EXPNO 350  
 PROCNO 1

F2 - Acquisition Parameters  
 Date\_ 20230808  
 Time 19.13  
 INSTRUM spect  
 PROBHD 5 mm PA-BBO BBV  
 PULPROG zgpg30  
 TD 65536  
 SOLVENT CDCl3  
 NS 2048  
 DS 4  
 SWH 24038.461 Hz  
 FIDRES 0.366798 Hz  
 AQ 1.3631488 sec  
 RG 201.48  
 DW 20.800 usec  
 DE 6.50 usec  
 TE 300.0 K  
 D1 1.00000000 sec  
 D11 0.03000000 sec  
 TDO 1

==== CHANNEL f1 ====  
 SFO1 100.6304993 MHz  
 NUC1  $^{13}\text{C}$   
 P1 9.90 usec  
 PLW1 53.00000000 W

==== CHANNEL f2 ====  
 SFO2 400.1621006 MHz  
 NUC2  $^1\text{H}$   
 CPDPRG2 waltz16  
 PCPD2 90.00 usec  
 PLW2 13.00000000 W  
 PLW12 0.27963999 W  
 PLW13 0.22651000 W

F2 - Processing parameters  
 SI 32768  
 SF 100.6204380 MHz  
 WDW EM  
 SSB 0  
 LB 1.00 Hz  
 GB 0  
 PC 1.40

NRJP-455

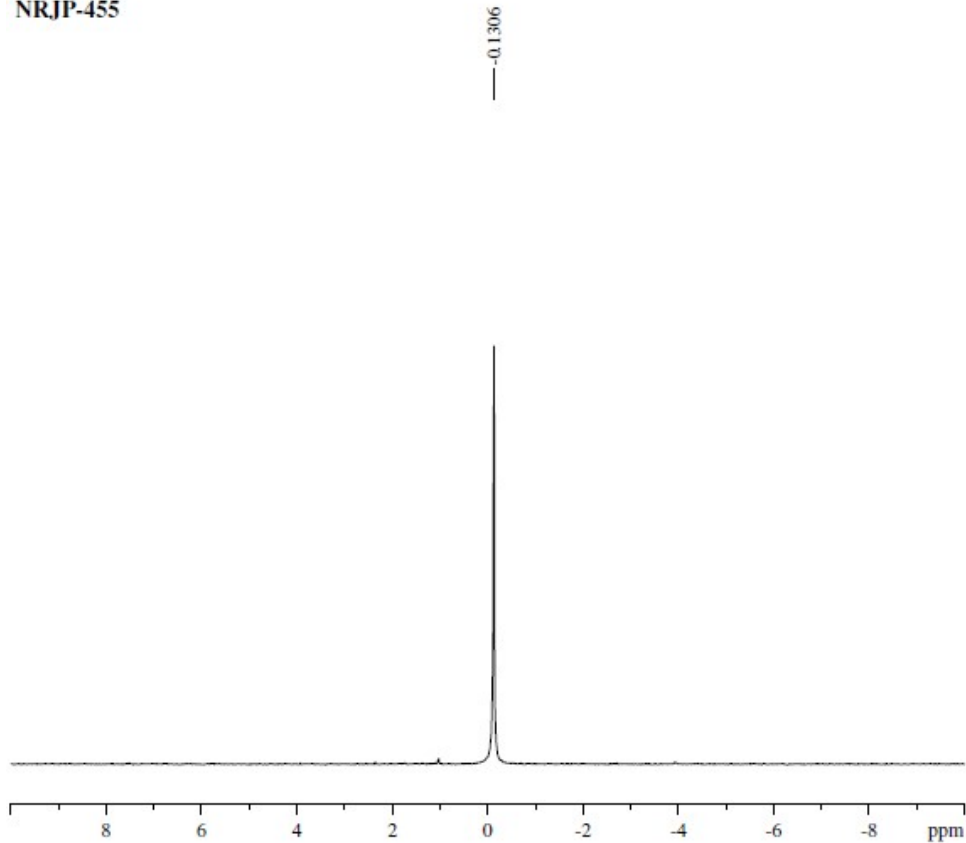

Figure S76:  $^{31}\text{P}\{\text{H}\}$  NMR spectrum of 3w

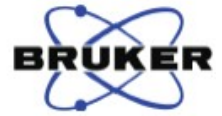

Current Data Parameters  
 NAME 09-AUG-AN-2023  
 EXPNO 440  
 PROCNO 1

F2 - Acquisition Parameters  
 Date\_ 20230809  
 Time 23.28  
 INSTRUM spect  
 PROBHD 5 mm PA-BBO BBV  
 PULPROG zgpg30  
 TD 65536  
 SOLVENT CDCl3  
 NS 16  
 DS 4  
 SWH 64102.563 Hz  
 FIDRES 0.978127 Hz  
 AQ 0.5111808 sec  
 RG 201.48  
 DW 7.800 usec  
 DE 6.50 usec  
 TE 300.1 K  
 D1 2.00000000 sec  
 D11 0.03000000 sec  
 TDO 1

==== CHANNEL f1 ====  
 SFO1 161.9798402 MHz  
 NUC1  $^{31}\text{P}$   
 P1 15.00 usec  
 PLW1 12.00000000 W

==== CHANNEL f2 ====  
 SFO2 400.1621006 MHz  
 NUC2  $^1\text{H}$   
 CPDPRG2 waltz16  
 PCPD2 90.00 usec  
 PLW2 13.00000000 W  
 PLW12 0.27963999 W  
 PLW13 0.22651000 W

F2 - Processing parameters  
 SI 32768  
 SF 161.9879400 MHz  
 WDW EM  
 SSB 0  
 LB 1.00 Hz  
 GB 0  
 PC 1.40

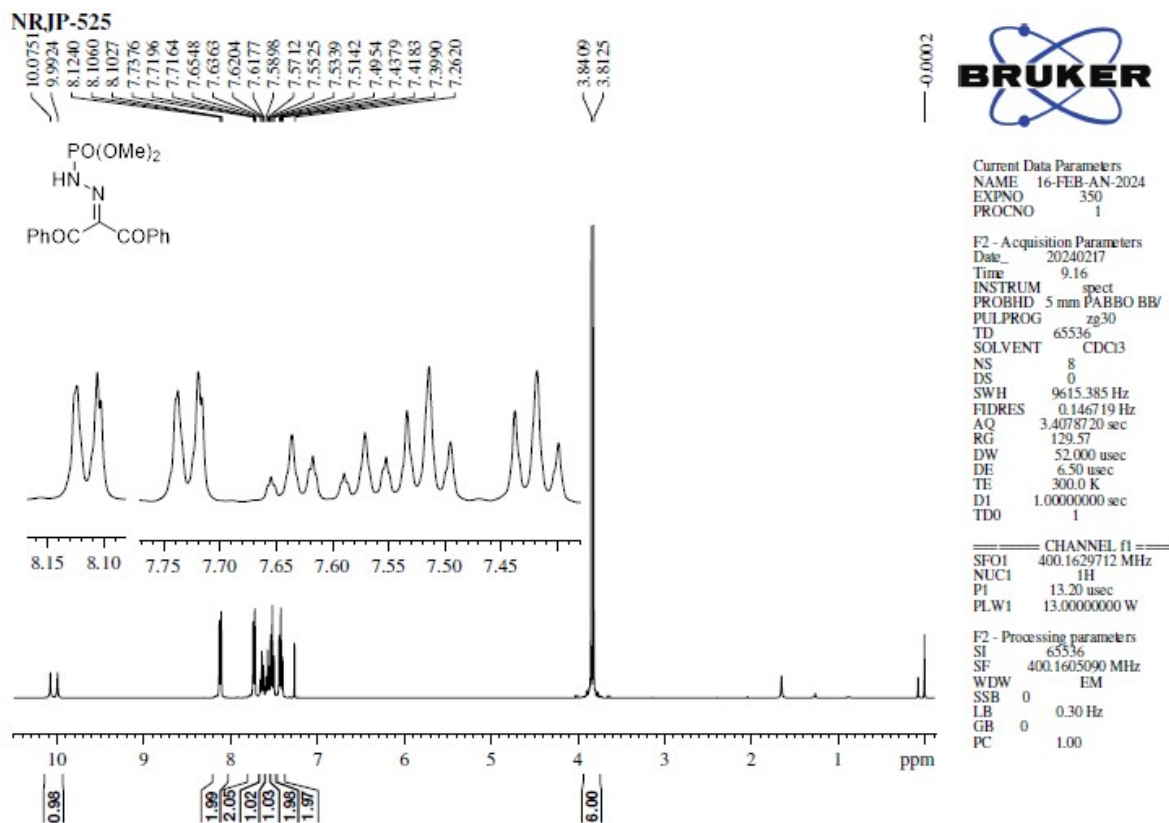

Figure S77: <sup>1</sup>H NMR spectrum of 3x

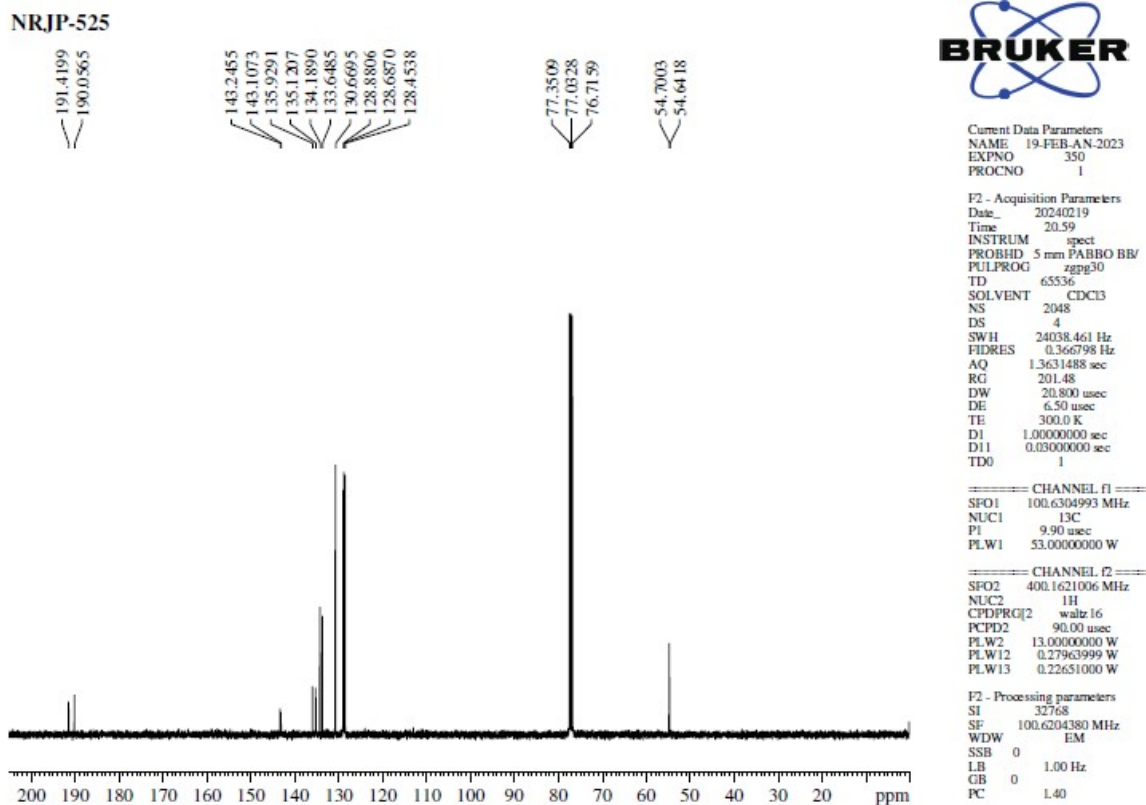

Figure S78: <sup>13</sup>C{<sup>1</sup>H} NMR spectrum of 3x

NRJP-525

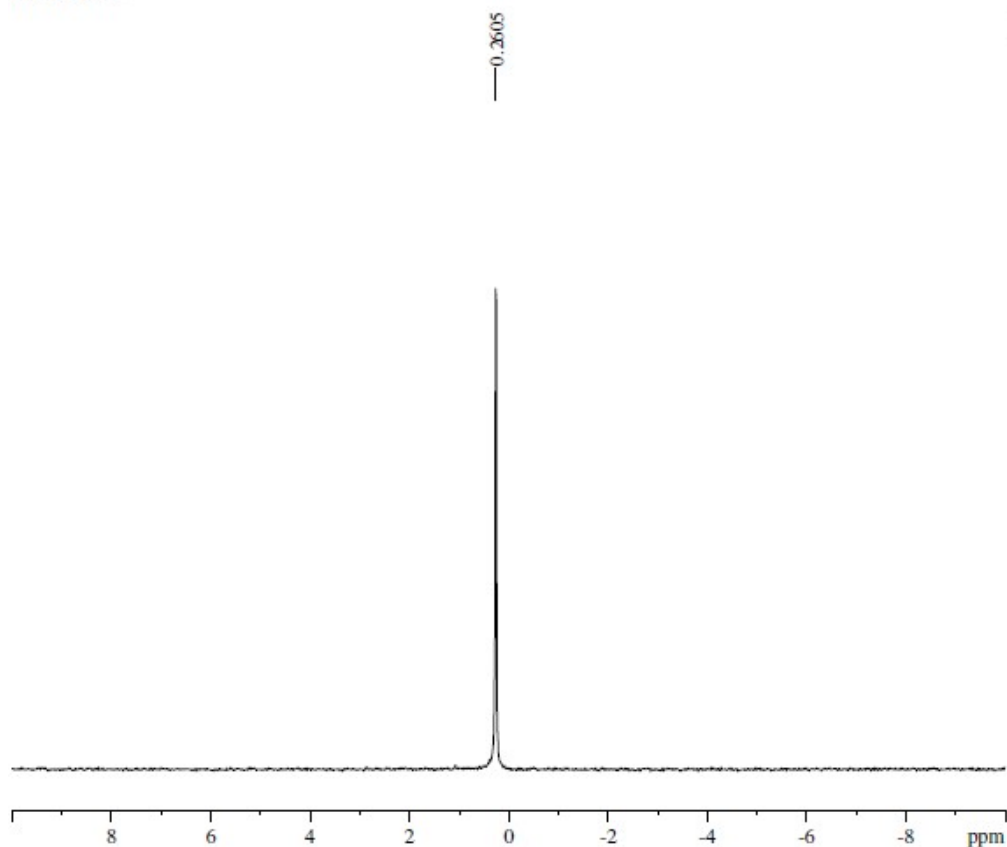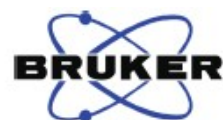

Current Data Parameters  
 NAME 16-FEB-AN-2024  
 EXPNO 360  
 PROCNO 1

F2 - Acquisition Parameters  
 Date\_ 20240217  
 Time 9.19  
 INSTRUM spect  
 PROBHD 5 mm PABBO BB/  
 PULPROG zgpg30  
 TD 65536  
 SOLVENT CDCl3  
 NS 16  
 DS 4  
 SWH 64102.563 Hz  
 FIDRES 0.978127 Hz  
 A Q 0.5111808 sec  
 RG 201.48  
 DW 7.800 usec  
 DE 6.50 usec  
 TE 300.1 K  
 D1 2.0000000 sec  
 D11 0.03000000 sec  
 TD0 1

==== CHANNEL f1 ====  
 SFO1 161.9798402 MHz  
 NUC1 31P  
 P1 15.00 usec  
 PLW1 12.00000000 W

==== CHANNEL f2 ====  
 SFO2 400.1621006 MHz  
 NUC2 1H  
 CPDPRG[2] waltz16  
 PCPD2 90.00 usec  
 PLW2 13.00000000 W  
 PLW12 0.279639999 W  
 PLW13 0.226510000 W

F2 - Processing parameters  
 SI 32768  
 SF 161.9879400 MHz  
 WDW EM  
 SSB 0  
 LB 1.00 Hz  
 GB 0  
 PC 1.40

Figure S79:  $^{31}\text{P}\{\text{H}\}$  NMR spectrum of 3x

NRJP-353

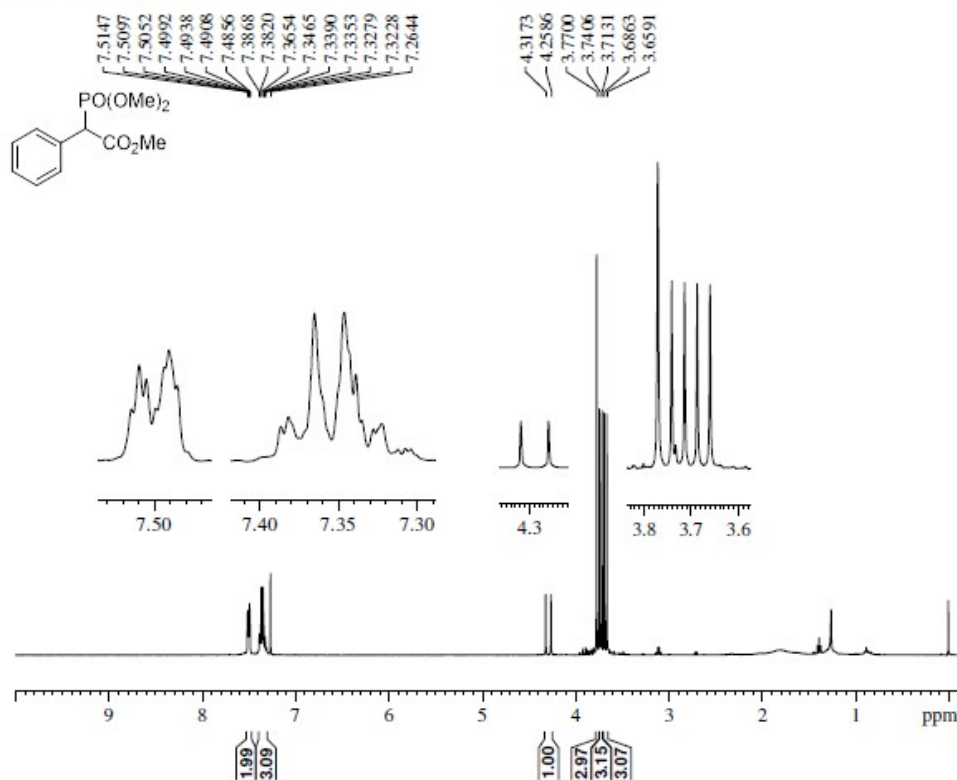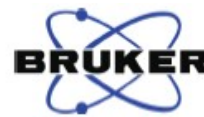

Current Data Parameters  
 NAME 12-Apr-FN-2023  
 EXPNO 320  
 PROCNO 1

F2 - Acquisition Parameters  
 Date\_ 20230412  
 Time 19.33  
 INSTRUM spect  
 PROBHD 5 mm PABBO BB/  
 PULPROG zg30  
 TD 65536  
 SOLVENT CDCl3  
 NS 8  
 DS 0  
 SWH 9615.385 Hz  
 FIDRES 0.146719 Hz  
 A Q 3.4078720 sec  
 RG 129.57  
 DW 52.000 usec  
 DE 6.50 usec  
 TE 300.0 K  
 D1 1.00000000 sec  
 TD0 1

==== CHANNEL f1 ====  
 SFO1 400.1629712 MHz  
 NUC1 1H  
 P1 13.20 usec  
 PLW1 13.00000000 W

F2 - Processing parameters  
 SI 65536  
 SF 400.1605079 MHz  
 WDW EM  
 SSB 0  
 LB 0.30 Hz  
 GB 0  
 PC 1.00

Figure S80:  $^1\text{H}$  NMR spectrum of 4a

NRJP 353

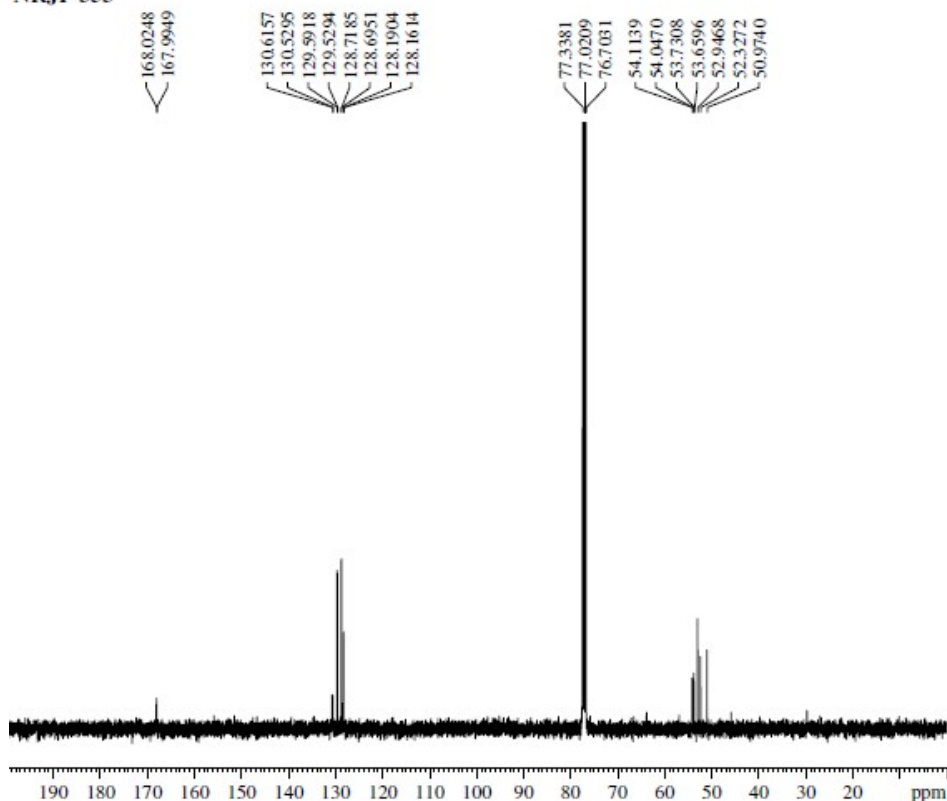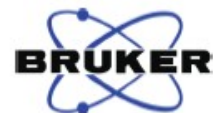

Current Data Parameters  
 NAME 18-Apr-AN-2023  
 EXPNO 480  
 PROCNO 1

F2 - Acquisition Parameters  
 Date\_ 20230419  
 Time 2.40  
 INSTRUM spect  
 PROBHD 5 mm PABBO BB/  
 PULPROG zgpg30  
 TD 65536  
 SOLVENT CDCl3  
 NS 2048  
 DS 0  
 SWH 24038.461 Hz  
 FIDRES 0.366798 Hz  
 AQ 1.3631488 sec  
 RG 201.48  
 DW 20.800 usec  
 DE 6.50 usec  
 TE 300.0 K  
 D1 1.00000000 sec  
 D11 0.03000000 sec  
 TD0 1

==== CHANNEL f1 =====  
 SFO1 100.6304993 MHz  
 NUC1 13C  
 P1 9.90 usec  
 PLW1 53.00000000 W

==== CHANNEL f2 =====  
 SFO2 400.1621006 MHz  
 NUC2 1H  
 CPDPRG2 waltz16  
 PCPD2 90.00 usec  
 PLW2 13.00000000 W  
 PLW12 0.27963999 W  
 PLW13 0.22651000 W

F2 - Processing parameters  
 SI 32768  
 SF 100.6204380 MHz  
 WDW EM  
 SSB 0  
 LB 1.00 Hz  
 GB 0  
 PC 1.40

Figure S81:  $^{13}\text{C}\{\text{H}\}$  NMR spectrum of 4a

NRJP 353

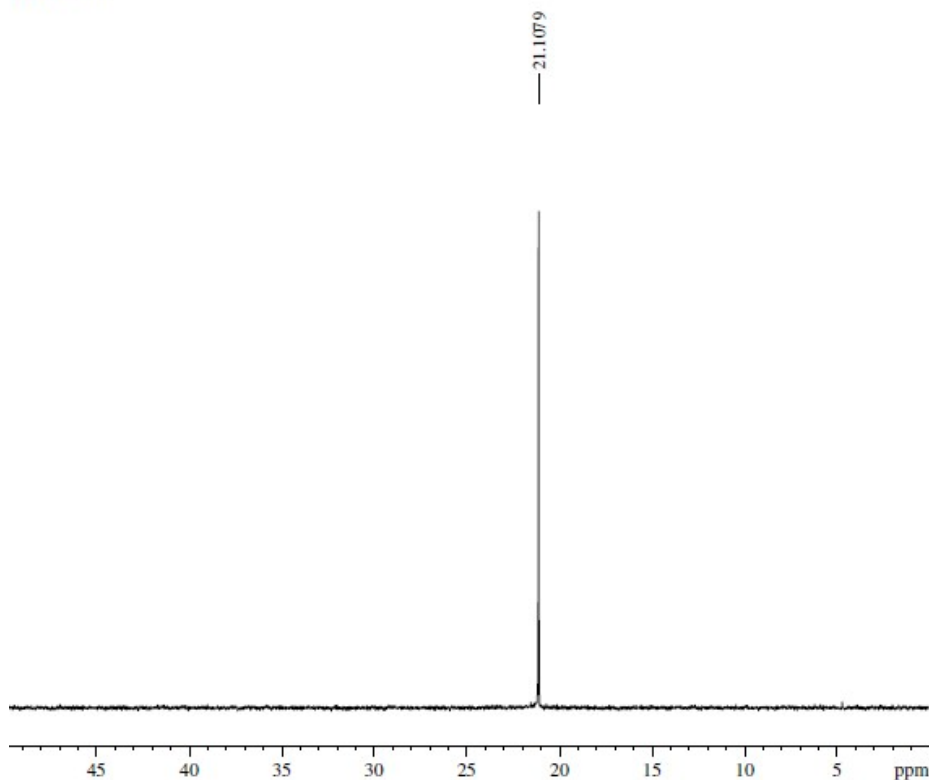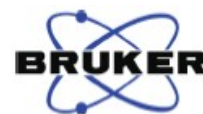

Current Data Parameters  
 NAME 13-Apr-AN-2023  
 EXPNO 420  
 PROCNO 1

F2 - Acquisition Parameters  
 Date\_ 20230414  
 Time 8.18  
 INSTRUM spect  
 PROBHD 5 mm PABBO BB/  
 PULPROG zgpg30  
 TD 65536  
 SOLVENT CDCl3  
 NS 16  
 DS 4  
 SWH 64102.563 Hz  
 FIDRES 0.978127 Hz  
 AQ 0.5111808 sec  
 RG 201.48  
 DW 7.800 usec  
 DE 6.50 usec  
 TE 300.1 K  
 D1 2.00000000 sec  
 D11 0.03000000 sec  
 TD0 1

==== CHANNEL f1 =====  
 SFO1 161.9798402 MHz  
 NUC1 31P  
 P1 15.00 usec  
 PLW1 12.00000000 W

==== CHANNEL f2 =====  
 SFO2 400.1621006 MHz  
 NUC2 1H  
 CPDPRG2 waltz16  
 PCPD2 90.00 usec  
 PLW2 13.00000000 W  
 PLW12 0.27963999 W  
 PLW13 0.22651000 W

F2 - Processing parameters  
 SI 32768  
 SF 161.9879400 MHz  
 WDW EM  
 SSB 0  
 LB 1.00 Hz  
 GB 0  
 PC 1.40

Figure S82:  $^{31}\text{P}\{\text{H}\}$  NMR spectrum of 4a

NRJP 415

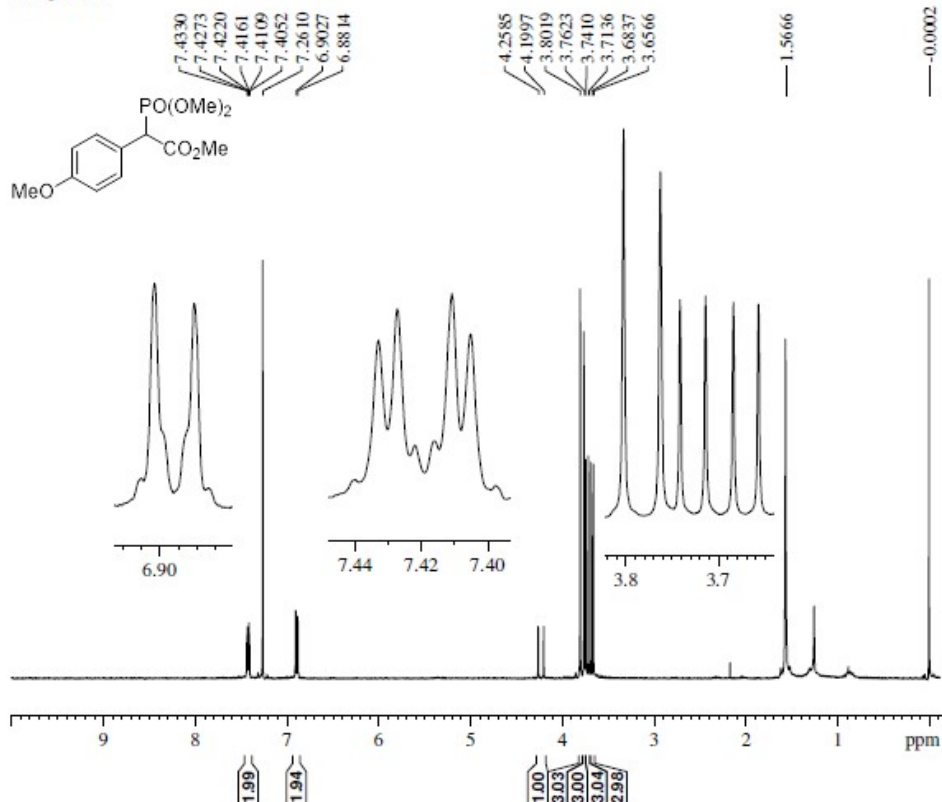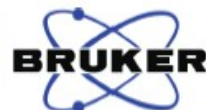

Current Data Parameters  
 NAME 31-MAY-AN-2023  
 EXPNO 320  
 PROCNO 1

F2 - Acquisition Parameters  
 Date\_ 20230531  
 Time 18.51  
 INSTRUM spect  
 PROBHD 5 mm PABBO BB  
 PULPROG zg30  
 TD 65536  
 SOLVENT CDCl3  
 NS 8  
 DS 0  
 SWH 9615.385 Hz  
 FIDRES 0.146719 Hz  
 AQ 3.4078720 sec  
 RG 179.93  
 DW 52.000 usec  
 DE 6.50 usec  
 TE 300.0 K  
 D1 1.00000000 sec  
 TD0 1

==== CHANNEL f1 ====  
 SFO1 400.1629712 MHz  
 NUC1 1H  
 P1 13.20 usec  
 PLW1 13.00000000 W

F2 - Processing parameters  
 SI 65536  
 SF 400.1605094 MHz  
 WDW EM  
 SSB 0  
 LB 0.30 Hz  
 GB 0  
 PC 1.00

Figure S83: <sup>1</sup>H NMR spectrum of 4b

NRJP-415

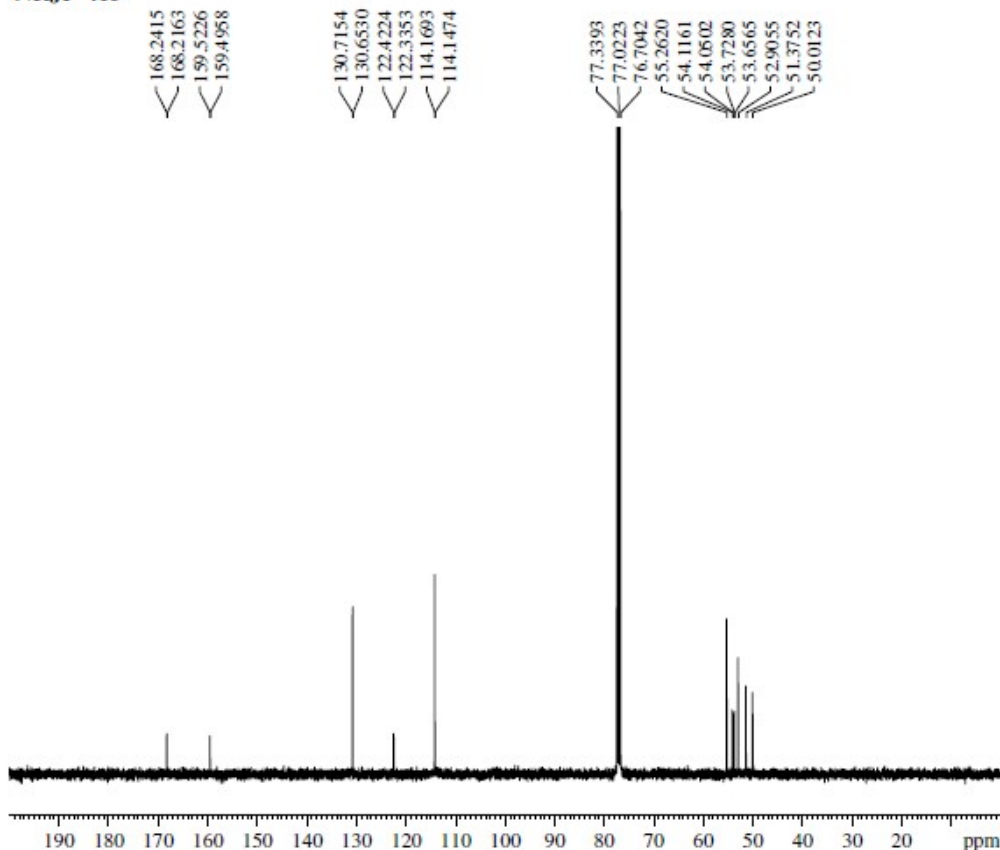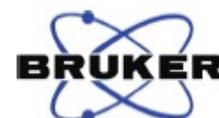

Current Data Parameters  
 NAME 22-May-AN-2023  
 EXPNO 310  
 PROCNO 1

F2 - Acquisition Parameters  
 Date\_ 20230522  
 Time 19.47  
 INSTRUM spect  
 PROBHD 5 mm PABBO BB  
 PULPROG zgpg30  
 TD 65536  
 SOLVENT CDCl3  
 NS 2048  
 DS 0  
 SWH 24038.461 Hz  
 FIDRES 0.366798 Hz  
 AQ 1.3631488 sec  
 RG 201.48  
 DW 20.800 usec  
 DE 6.50 usec  
 TE 300.0 K  
 D1 1.00000000 sec  
 D11 0.03000000 sec  
 TD0 1

==== CHANNEL f1 ====  
 SFO1 100.6304993 MHz  
 NUC1 13C  
 P1 9.90 usec  
 PLW1 53.00000000 W

==== CHANNEL f2 ====  
 SFO2 400.1621006 MHz  
 NUC2 1H  
 CPDPRG2 waltz16  
 PCPD2 90.00 usec  
 PLW2 13.00000000 W  
 PLW12 0.27963999 W  
 PLW13 0.22651000 W

F2 - Processing parameters  
 SI 32768  
 SF 100.6204380 MHz  
 WDW EM  
 SSB 0  
 LB 1.00 Hz  
 GB 0  
 PC 1.40

Figure S84: <sup>13</sup>C{<sup>1</sup>H} NMR spectrum of 4b



NRJP 415

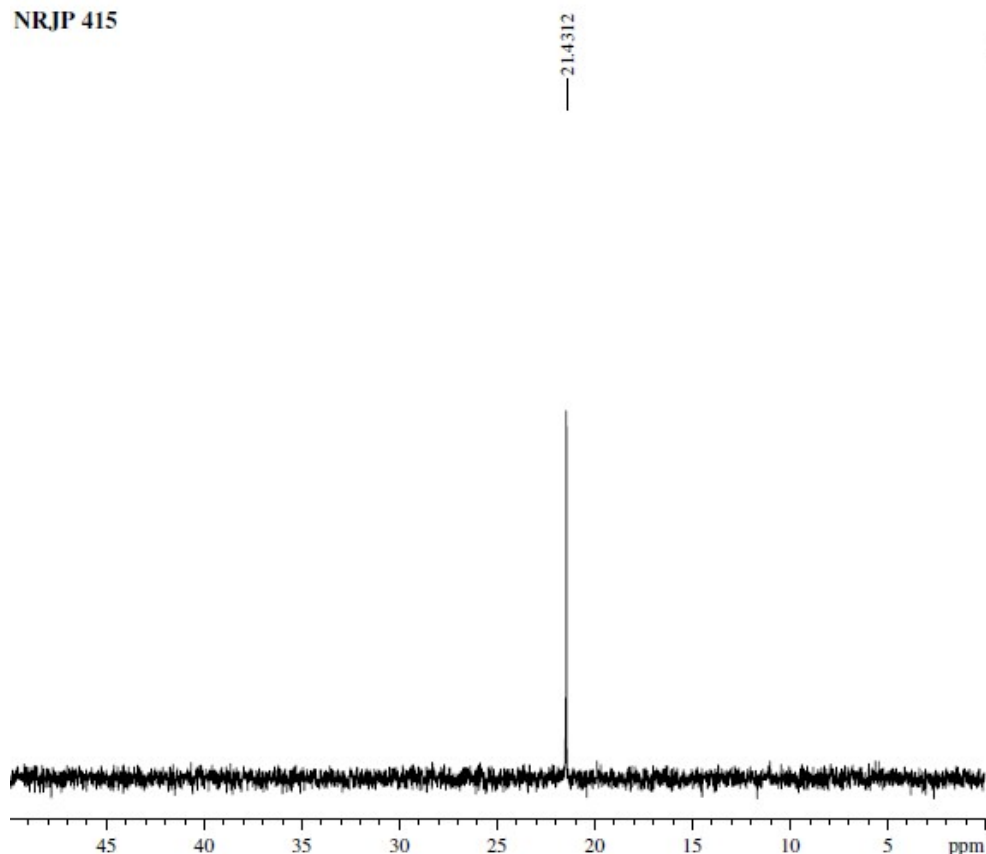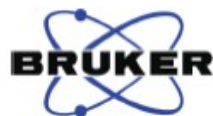

Current Data Parameters  
 NAME 07-JUN-AN-2023  
 EXPNO 350  
 PROCNO 1

F2 - Acquisition Parameters  
 Date\_ 20230607  
 Time 22.09  
 INSTRUM spect  
 PROBHD 5 mm PABBO BB/  
 PULPROG zgpg30  
 TD 65536  
 SOLVENT CDCl3  
 NS 16  
 DS 4  
 SWH 64102.563 Hz  
 FIDRES 0.978127 Hz  
 AQ 0.5111808 sec  
 RG 201.48  
 DW 7.800 usec  
 DE 6.50 usec  
 TE 300.1 K  
 D1 2.00000000 sec  
 D11 0.03000000 sec  
 TDO 1

==== CHANNEL f1 ====  
 SFO1 161.9798402 MHz  
 NUC1 31P  
 P1 15.00 usec  
 PLW1 12.00000000 W

==== CHANNEL f2 ====  
 SFO2 400.1621006 MHz  
 NUC2 1H  
 CPDPRG2 walz16  
 PCPD2 90.00 usec  
 PLW2 13.00000000 W  
 PLW12 0.27963999 W  
 PLW13 0.22651000 W

F2 - Processing parameters  
 SI 32768  
 SF 161.9879400 MHz  
 WDW EM  
 SSB 0  
 LB 1.00 Hz  
 GB 0  
 PC 1.40

Figure S85: <sup>31</sup>P{H} NMR spectrum of 4b

NRJP-414

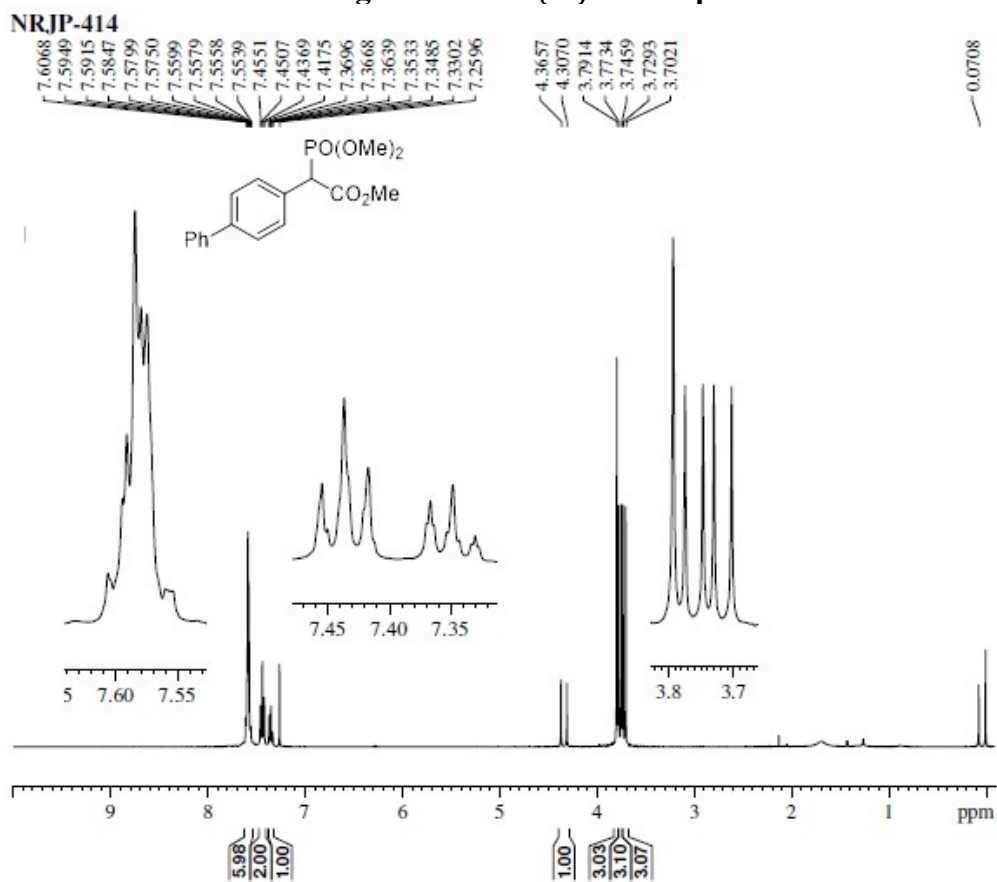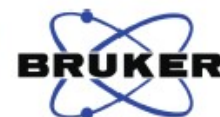

Current Data Parameters  
 NAME 18-Dec-AN-2023  
 EXPNO 350  
 PROCNO 1

F2 - Acquisition Parameters  
 Date\_ 20231218  
 Time 21.45  
 INSTRUM spect  
 PROBHD 5 mm PABBO BB/  
 PULPROG zg30  
 TD 65536  
 SOLVENT CDCl3  
 NS 8  
 DS 0  
 SWH 9615.385 Hz  
 FIDRES 0.146719 Hz  
 AQ 3.4078720 sec  
 RG 145.29  
 DW 52.000 usec  
 DE 6.50 usec  
 TE 300.0 K  
 D1 1.00000000 sec  
 TDO 1

==== CHANNEL f1 ====  
 SFO1 400.1629712 MHz  
 NUC1 1H  
 P1 13.20 usec  
 PLW1 13.00000000 W

F2 - Processing parameters  
 SI 65536  
 SF 400.1605097 MHz  
 WDW EM  
 SSB 0  
 LB 0.30 Hz  
 GB 0  
 PC 1.00

Figure S86: <sup>1</sup>H NMR spectrum of 4c

NRJP-414

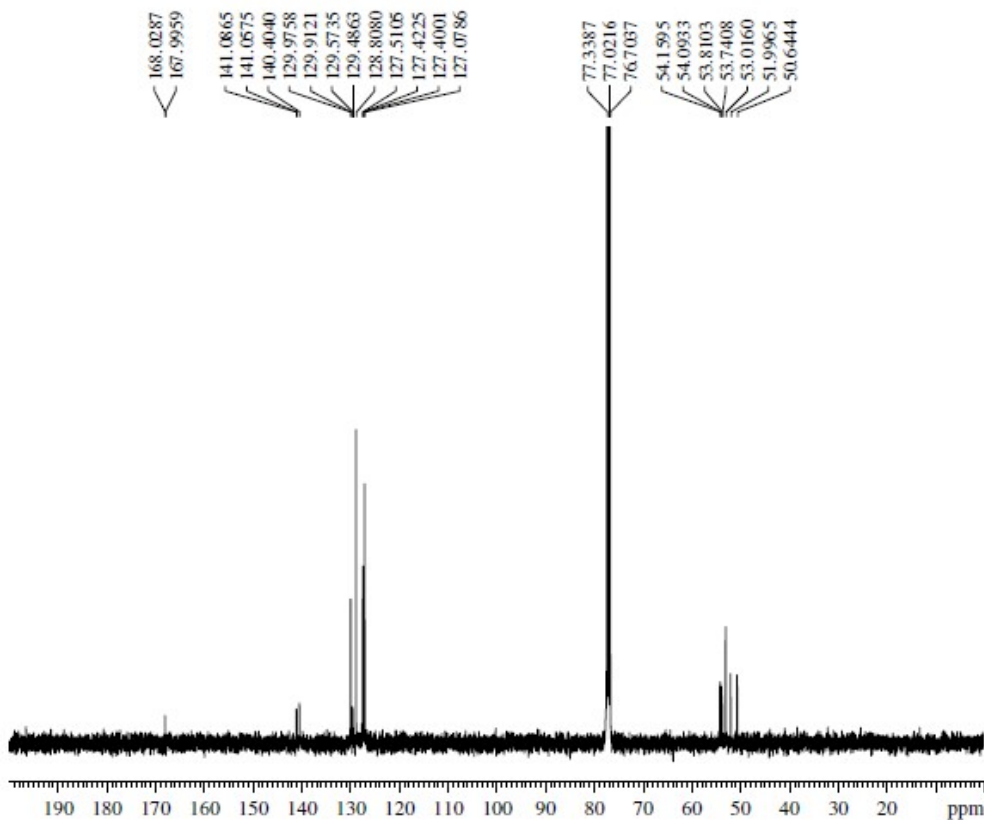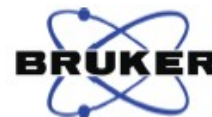

Current Data Parameters  
 NAME 19-May-AN-2023  
 EXPNO 420  
 PROCNO 1

F2 - Acquisition Parameters  
 Date\_ 20230520  
 Time 14.04  
 INSTRUM spect  
 PROBHD 5 mm PABBO BB  
 PULPROG zgpg30  
 TD 65536  
 SOLVENT CDCl3  
 NS 2048  
 DS 0  
 SWH 24038.461 Hz  
 FIDRES 0.363798 Hz  
 AQ 1.3631488 sec  
 RG 201.48  
 DW 20.800 usec  
 DE 6.50 usec  
 TE 300.0 K  
 D1 1.00000000 sec  
 D11 0.03000000 sec  
 TDO 1

==== CHANNEL f1 =====  
 SFO1 100.6304993 MHz  
 NUC1 13C  
 P1 9.90 usec  
 PLW1 53.0000000 W

==== CHANNEL f2 =====  
 SFO2 400.1621006 MHz  
 NUC2 1H  
 CPDPRG[2] waltz16  
 PCPD2 90.00 usec  
 PLW2 13.0000000 W  
 PLW12 0.27963999 W  
 PLW13 0.22651000 W

F2 - Processing parameters  
 SI 32768  
 SF 100.6204380 MHz  
 WDW EM  
 SSB 0  
 LB 1.00 Hz  
 GB 0  
 PC 1.40

Figure S87:  $^{13}\text{C}\{\text{H}\}$  NMR spectrum of 4c

NRJP 414

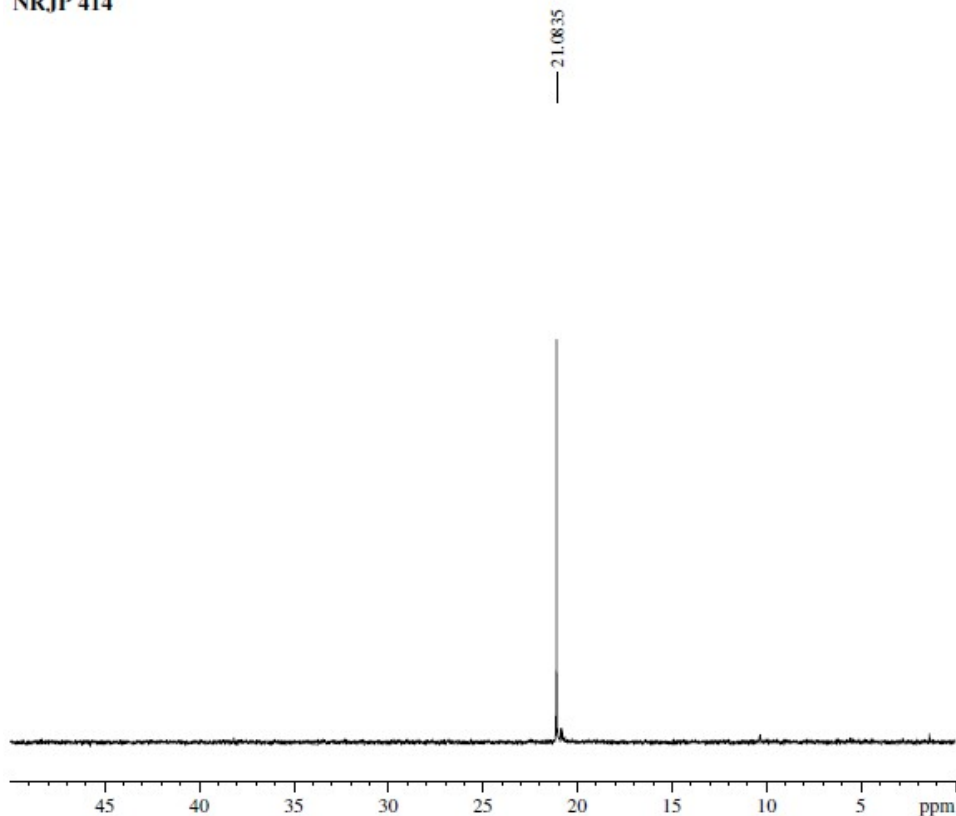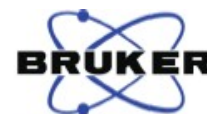

Current Data Parameters  
 NAME 23-May-AN-2023  
 EXPNO 580  
 PROCNO 1

F2 - Acquisition Parameters  
 Date\_ 20230523  
 Time 13.36  
 INSTRUM spect  
 PROBHD 5 mm PABBO BB/  
 PULPROG zgpg30  
 TD 65536  
 SOLVENT CDCl3  
 NS 16  
 DS 4  
 SWH 64102.563 Hz  
 FIDRES 0.978127 Hz  
 AQ 0.5111808 sec  
 RG 201.48  
 DW 7.800 usec  
 DE 6.50 usec  
 TE 300.1 K  
 D1 2.00000000 sec  
 D11 0.03000000 sec  
 TDO 1

==== CHANNEL f1 =====  
 SFO1 161.9798402 MHz  
 NUC1 31P  
 P1 15.00 usec  
 PLW1 12.0000000 W

==== CHANNEL f2 =====  
 SFO2 400.1621006 MHz  
 NUC2 1H  
 CPDPRG[2] waltz16  
 PCPD2 90.00 usec  
 PLW2 13.0000000 W  
 PLW12 0.27963999 W  
 PLW13 0.22651000 W

F2 - Processing parameters  
 SI 32768  
 SF 161.9879400 MHz  
 WDW EM  
 SSB 0  
 LB 1.00 Hz  
 GB 0  
 PC 1.40

Figure S88:  $^{31}\text{P}\{\text{H}\}$  NMR spectrum of 4c

NRJP 407

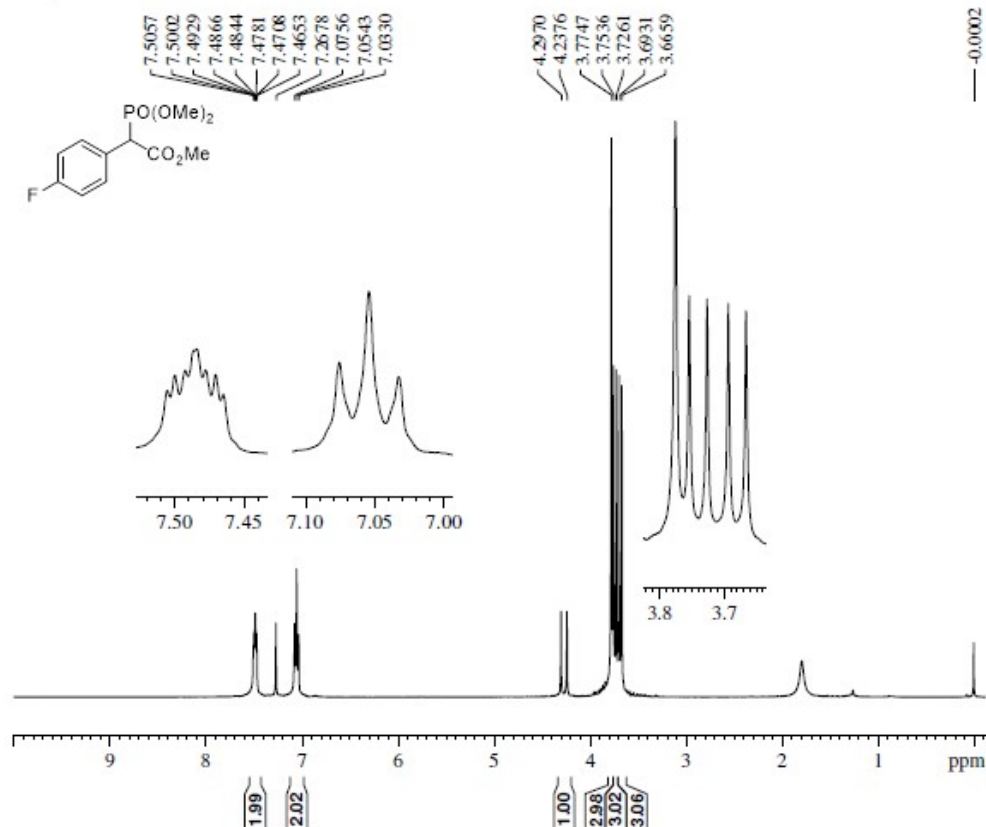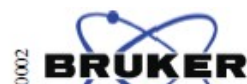

Current Data Parameters  
 NAME 06-JUL-AN-2023  
 EXPNO 400  
 PROCNO 1

F2 - Acquisition Parameters  
 Date\_ 20230706  
 Time 22.53  
 INSTRUM spect  
 PROBHD 5 mm PABBO BB/  
 PULPROG zg30  
 TD 65536  
 SOLVENT CDCl3  
 NS 8  
 DS 0  
 SWH 9615.385 Hz  
 FIDRES 0.146719 Hz  
 AQ 3.4078720 sec  
 RG 129.57  
 DW 52.000 usec  
 DE 6.50 usec  
 TE 300.0 K  
 D1 1.00000000 sec  
 TD0 1

CHANNEL f1 ==  
 SFO1 400.1629712 MHz  
 NUC1 1H  
 P1 13.20 usec  
 PLW1 13.00000000 W

F2 - Processing parameters  
 SI 65536  
 SF 400.1605067 MHz  
 WDW EM  
 SSB 0  
 LB 0.30 Hz  
 GB 0  
 PC 1.00

Figure S89:  $^1\text{H}$  NMR spectrum of 4d

NRJP-407

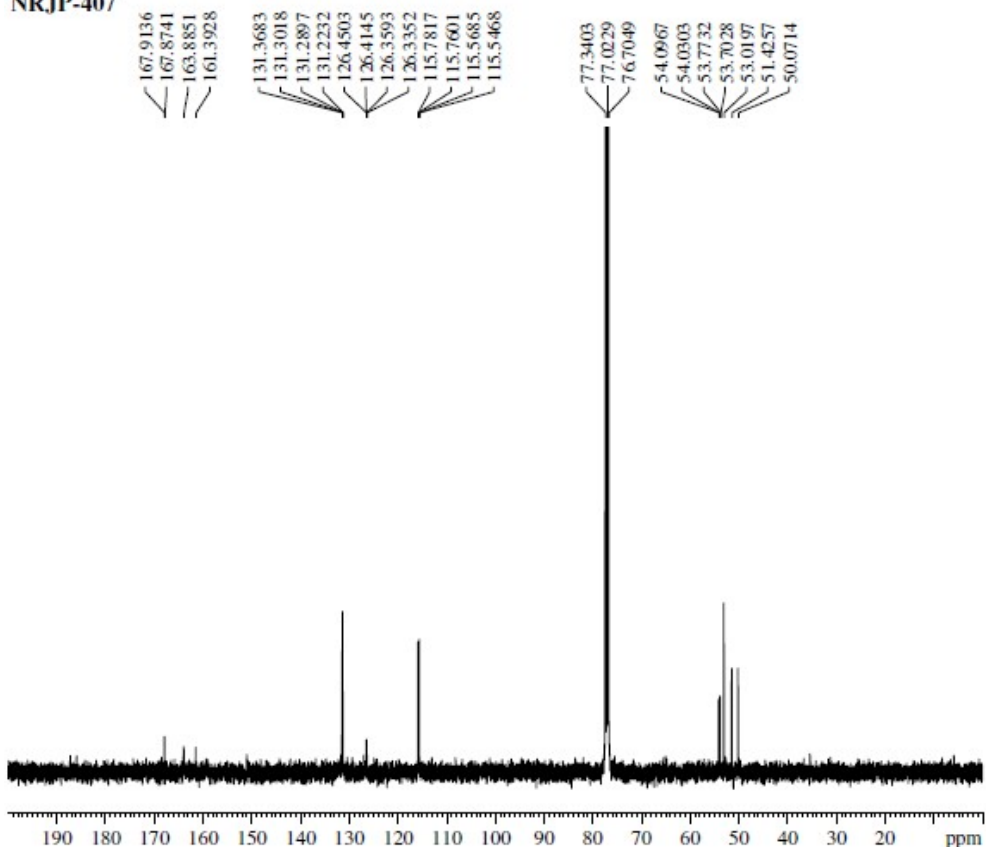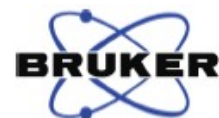

Current Data Parameters  
 NAME 04-JUL-AN-2023  
 EXPNO 410  
 PROCNO 1

F2 - Acquisition Parameters  
 Date\_ 20230704  
 Time 22.34  
 INSTRUM spect  
 PROBHD 5 mm PABBO BB/  
 PULPROG zgpg30  
 TD 65536  
 SOLVENT CDCl3  
 NS 2048  
 DS 4  
 SWH 24038.461 Hz  
 FIDRES 0.366798 Hz  
 AQ 1.3631488 sec  
 RG 201.48  
 DW 20.800 usec  
 DE 6.50 usec  
 TE 300.0 K  
 D1 1.00000000 sec  
 D11 0.03000000 sec  
 TD0 1

CHANNEL f1 ==  
 SFO1 100.6304993 MHz  
 NUC1 13C  
 P1 9.90 usec  
 PLW1 53.00000000 W

CHANNEL f2 ==  
 SFO2 400.1621006 MHz  
 NUC2 1H  
 CPDPRG2 walz16  
 PCPD2 90.00 usec  
 PLW2 13.00000000 W  
 PLW12 0.27963999 W  
 PLW13 0.22651000 W

F2 - Processing parameters  
 SI 32768  
 SF 100.6204380 MHz  
 WDW EM  
 SSB 0  
 LB 1.00 Hz  
 GB 0  
 PC 1.40

Figure S90:  $^{13}\text{C}\{^1\text{H}\}$  NMR spectrum of 4d

NRJP-407

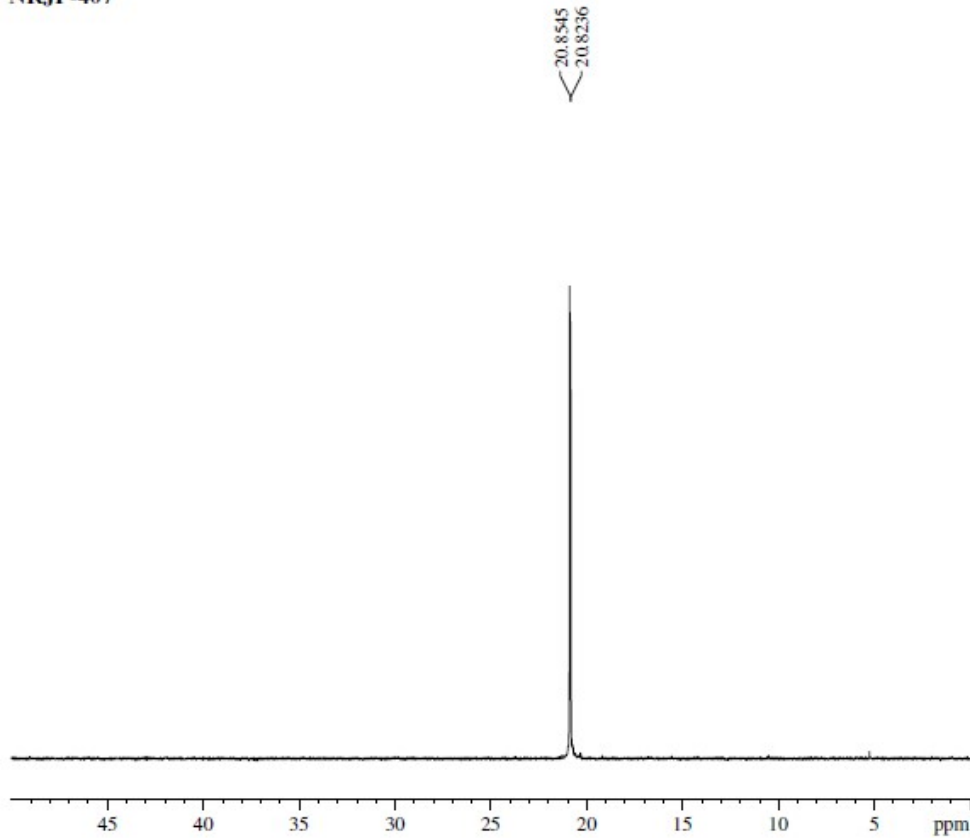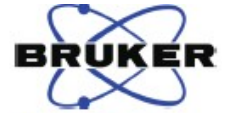

Current Data Parameters  
NAME 23-May-AN-2023  
EXPNO 400  
PROCNO 1

F2 - Acquisition Parameters  
Date\_ 20230523  
Time 19.47  
INSTRUM spect  
PROBHD 5 mm PABBO BV  
PULPROG zgpg30  
TD 65536  
SOLVENT CDCl3  
NS 16  
DS 4  
SWH 64102.563 Hz  
FIDRES 0.978127 Hz  
AQ 0.5111808 sec  
RG 201.48  
DW 7.800 usec  
DE 6.50 usec  
TE 300.1 K  
D1 2.00000000 sec  
D11 0.03000000 sec  
TDO 1

==== CHANNEL f1 ====  
SFO1 161.9798402 MHz  
NUC1 31P  
P1 15.00 usec  
PLW1 12.00000000 W

==== CHANNEL f2 ====  
SFO2 400.1621006 MHz  
NUC2 1H  
CPDPRG[2] waltz16  
PCPD2 90.00 usec  
PLW2 13.00000000 W  
PLW12 0.27963999 W  
PLW13 0.22651000 W

F2 - Processing parameters  
SI 32768  
SF 161.9879400 MHz  
WDW EM  
SSB 0  
LB 1.00 Hz  
GB 0  
PC 1.40

Figure S91:  $^{31}\text{P}\{\text{H}\}$  NMR spectrum of 4d

NRJP 407

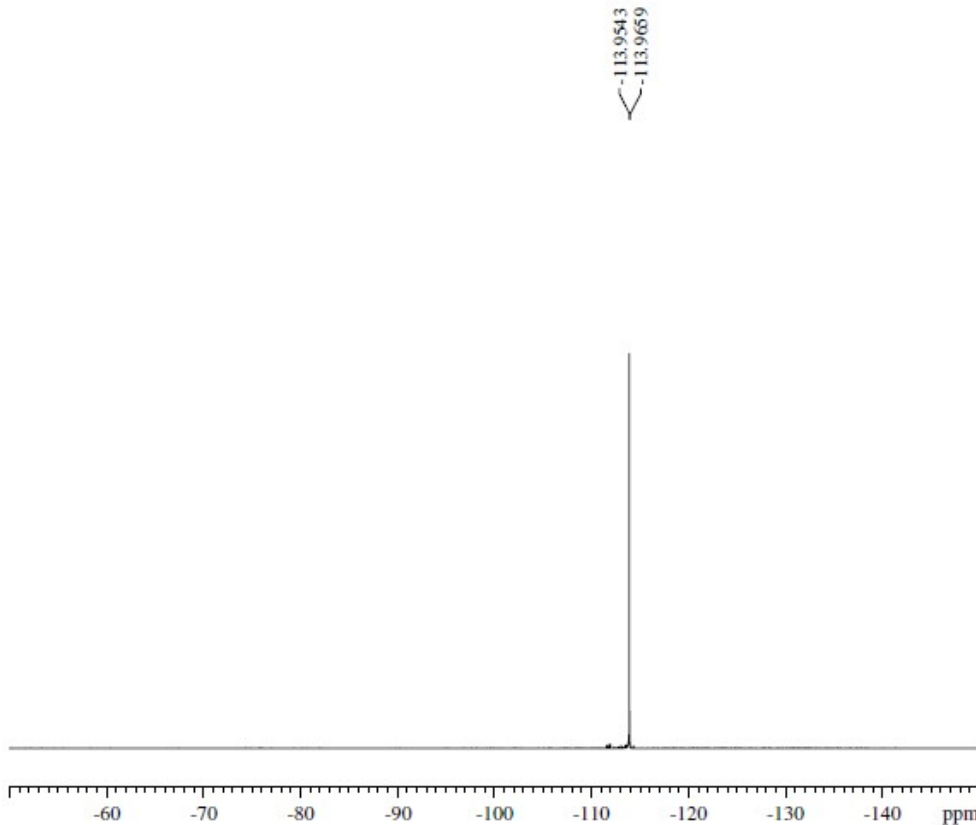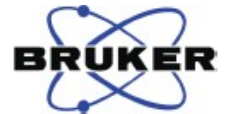

Current Data Parameters  
NAME 19-May-A-N-2023  
EXPNO 430  
PROCNO 1

F2 - Acquisition Parameters  
Date\_ 20230519  
Time 12.25  
INSTRUM spect  
PROBHD 5 mm PABBO BV  
PULPROG zgfhgqn.2  
TD 131072  
SOLVENT CDCl3  
NS 16  
DS 4  
SWH 89285.711 Hz  
FIDRES 0.681196 Hz  
AQ 0.7340032 sec  
RG 201.48  
DW 5.600 usec  
DE 6.50 usec  
TE 300.1 K  
D1 1.00000000 sec  
D11 0.03000000 sec  
D12 0.00002000 sec  
TDO 1

==== CHANNEL f1 ====  
SFO1 376.4894122 MHz  
NUC1 19F  
P1 15.00 usec  
PLW1 21.00000000 W

==== CHANNEL f2 ====  
SFO2 400.1621006 MHz  
NUC2 1H  
CPDPRG[2] waltz16  
PCPD2 90.00 usec  
PLW2 13.00000000 W  
PLW12 0.27963999 W

F2 - Processing parameters  
SI 65536  
SF 376.5270650 MHz  
WDW EM  
SSB 0  
LB 0.30 Hz  
GB 0  
PC 1.00

Figure S92:  $^{19}\text{F}\{\text{H}\}$  NMR spectrum of 4d

NRJP-419

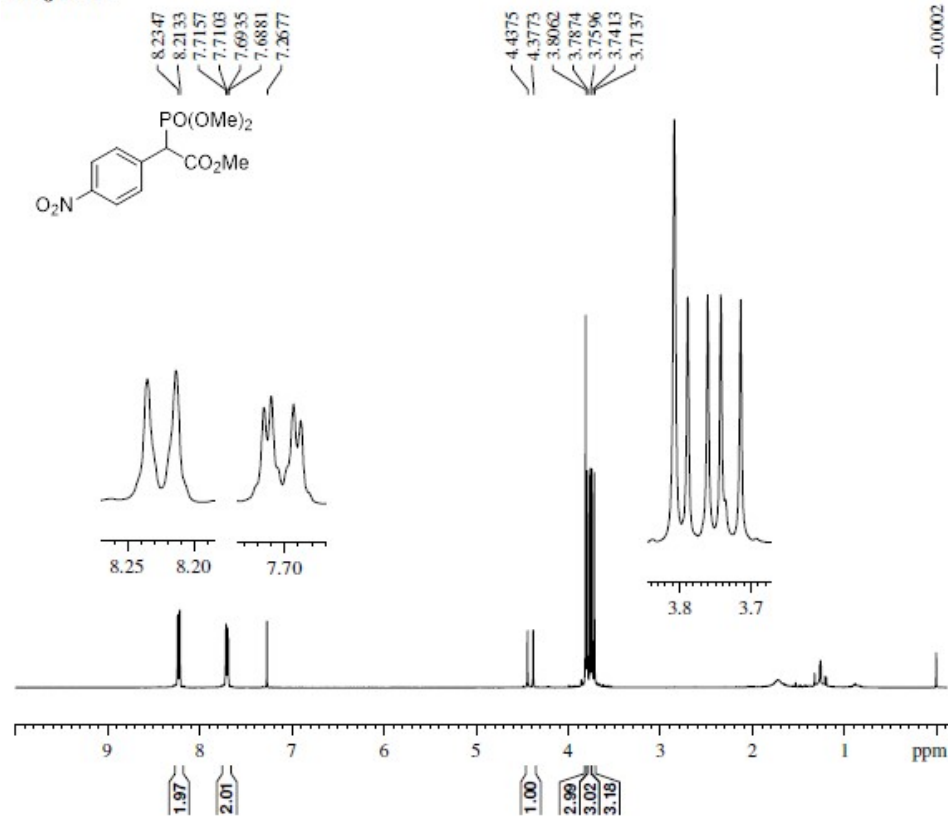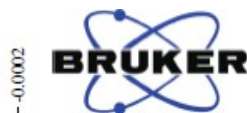

Current Data Parameters  
 NAME 16-MAY-AN-2023  
 EXPNO 460  
 PROCNO 1

F2 - Acquisition Parameters  
 Date\_ 20230516  
 Time 23.44  
 INSTRUM spect  
 PROBHD 5 mm PABBO BB  
 PULPROG zg30  
 TD 65536  
 SOLVENT CDCl3  
 NS 8  
 DS 0  
 SWH 9615.385 Hz  
 FIDRES 0.146719 Hz  
 AQ 3.4078720 sec  
 RG 129.57  
 DW 52.000 usec  
 DE 6.50 usec  
 TE 300.0 K  
 D1 1.00000000 sec  
 D10 1

===== CHANNEL f1 =====  
 SFO1 400.1629712 MHz  
 NUC1 1H  
 PI 13.20 usec  
 PLW1 13.00000000 W

F2 - Processing parameters  
 SI 65536  
 SF 400.1605066 MHz  
 WDW EM  
 SSB 0  
 LB 0.30 Hz  
 GB 0  
 PC 1.00

Figure S93: <sup>1</sup>H NMR spectrum of 4e

NRJP-419

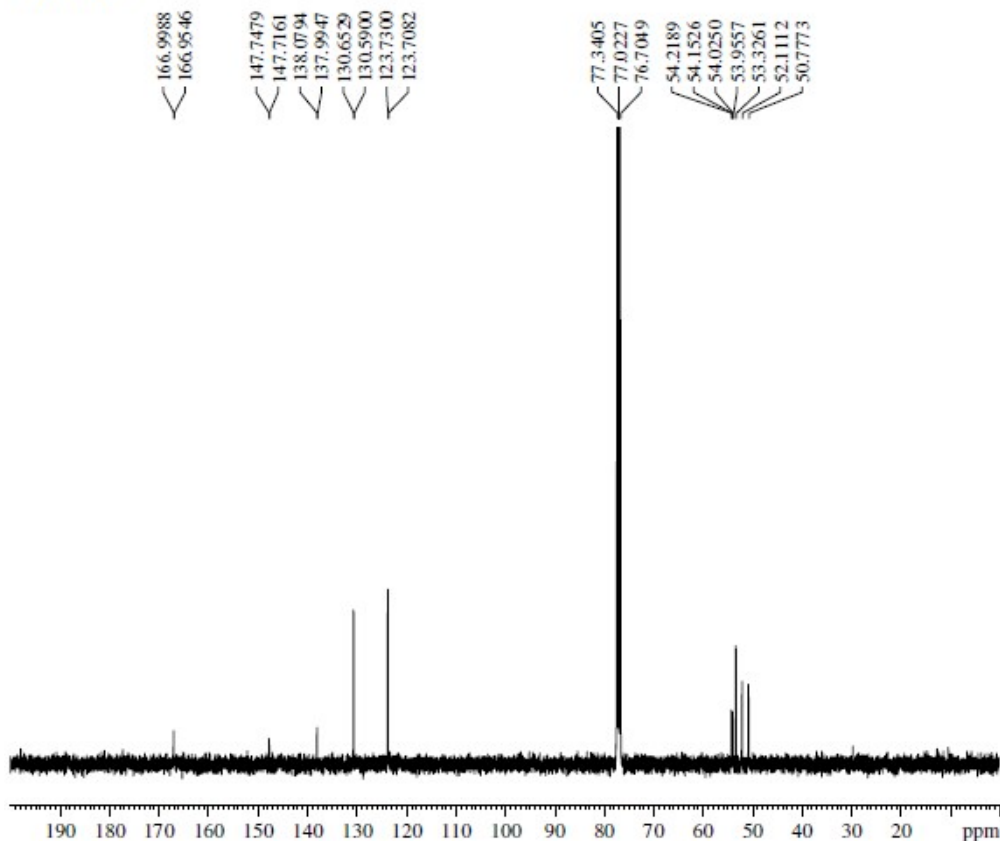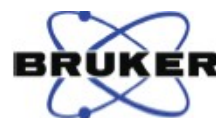

Current Data Parameters  
 NAME 18-May-AN-2023  
 EXPNO 400  
 PROCNO 1

F2 - Acquisition Parameters  
 Date\_ 20230519  
 Time 2.40  
 INSTRUM spect  
 PROBHD 5 mm PABBO BB/  
 PULPROG zgpg30  
 TD 65536  
 SOLVENT CDCl3  
 NS 2048  
 DS 0  
 SWH 24038.461 Hz  
 FIDRES 0.366798 Hz  
 AQ 1.3631488 sec  
 RG 201.48  
 DW 20.800 usec  
 DE 6.50 usec  
 TE 300.0 K  
 D1 1.00000000 sec  
 D11 0.03000000 sec  
 TD0 1

===== CHANNEL f1 =====  
 SFO1 100.6304993 MHz  
 NUC1 13C  
 PI 9.90 usec  
 PLW1 53.00000000 W

===== CHANNEL f2 =====  
 SFO2 400.1621006 MHz  
 NUC2 1H  
 CPDPRG[2] waltz16  
 PCPD2 90.00 usec  
 PLW2 13.00000000 W  
 PLW12 0.27963999 W  
 PLW13 0.22651000 W

F2 - Processing parameters  
 SI 32768  
 SF 100.6204380 MHz  
 WDW EM  
 SSB 0  
 LB 1.00 Hz  
 GB 0  
 PC 1.40

Figure S94: <sup>13</sup>C{<sup>1</sup>H} NMR spectrum of 4e

NRJP 419

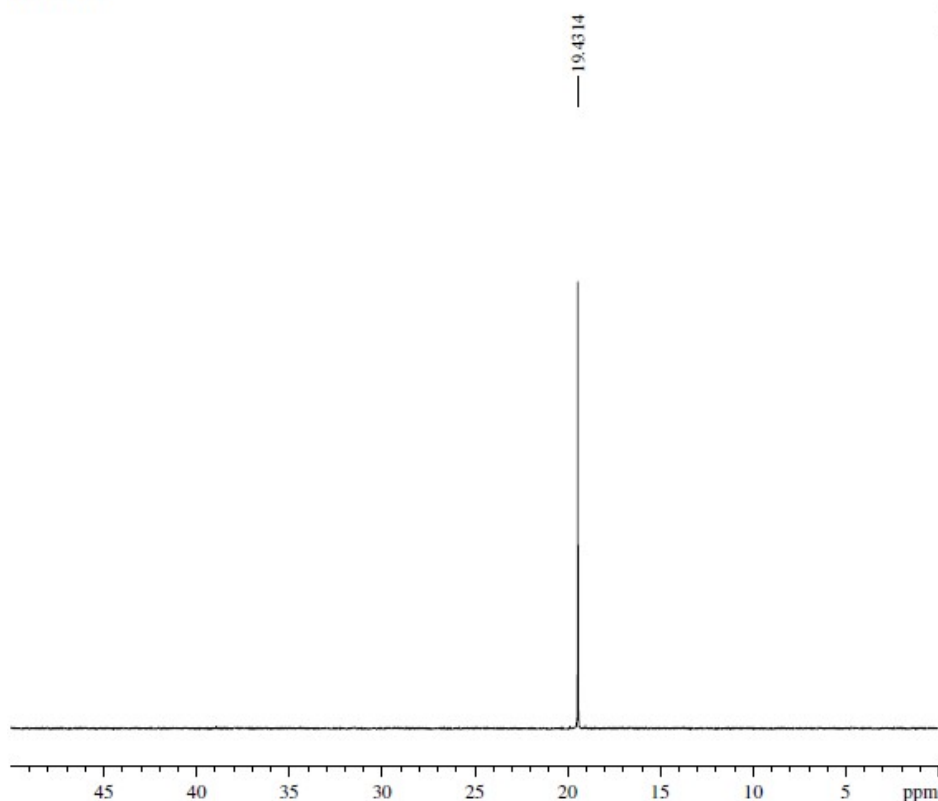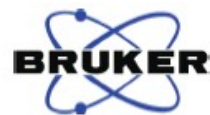

Current Data Parameters  
 NAME 23-May-AN-2023  
 EXPNO 560  
 PROCNO 1

F2 - Acquisition Parameters  
 Date\_ 20230523  
 Time 13.25  
 INSTRUM spect  
 PROBHD 5 mm PABBO BB/  
 PULPROG zgpg30  
 TD 65536  
 SOLVENT CDCl3  
 NS 16  
 DS 4  
 SWH 64102.563 Hz  
 FIDRES 0.978127 Hz  
 AQ 0.511808 sec  
 RG 201.48  
 DW 7.800 usec  
 DE 6.50 usec  
 TE 300.1 K  
 D1 2.0000000 sec  
 D11 0.03000000 sec  
 TD0 1

==== CHANNEL f1 ====  
 SFO1 161.9798402 MHz  
 NUC1 31P  
 P1 15.00 usec  
 PLW1 12.00000000 W

==== CHANNEL f2 ====  
 SFO2 400.1621006 MHz  
 NUC2 1H  
 CPDPRG2 waltz16  
 PCPD2 90.00 usec  
 PLW2 13.00000000 W  
 PLW12 0.27963999 W  
 PLW13 0.22651000 W

F2 - Processing parameters  
 SI 32768  
 SF 161.9879400 MHz  
 WDW EM  
 SSB 0  
 LB 1.00 Hz  
 GB 0  
 PC 1.40

Figure S95:  $^{31}\text{P}\{\text{H}\}$  NMR spectrum of 4e

NRJP-421

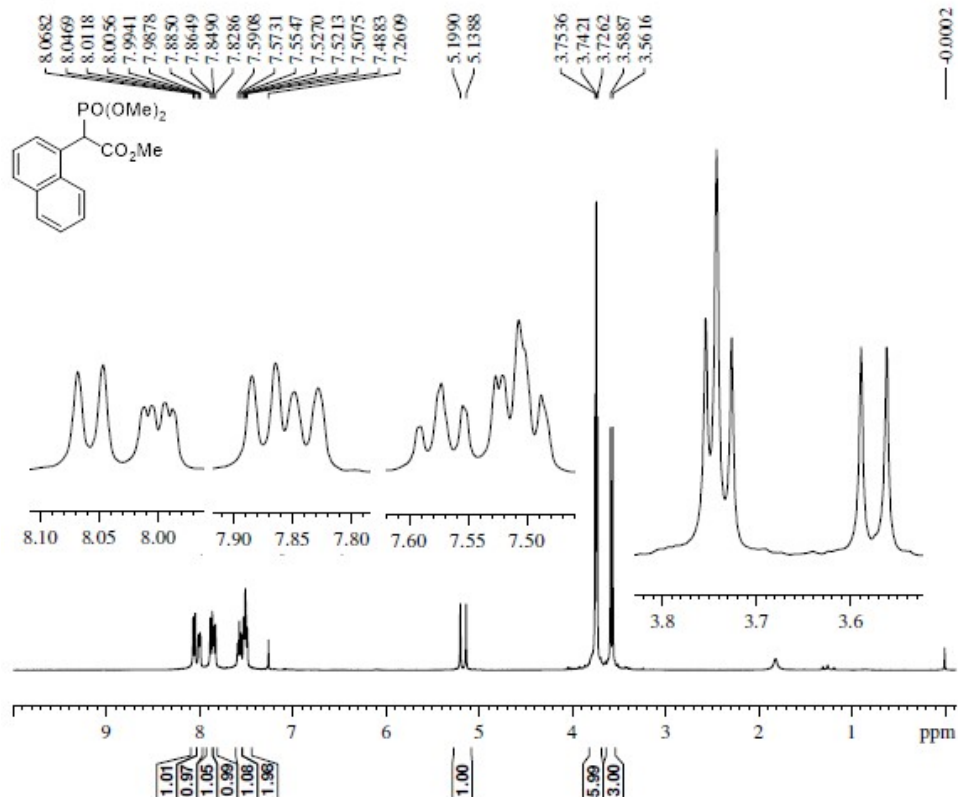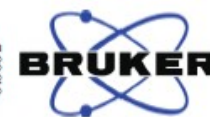

Current Data Parameters  
 NAME 16-MAY-AN-2023  
 EXPNO 450  
 PROCNO 1

F2 - Acquisition Parameters  
 Date\_ 20230516  
 Time 23.39  
 INSTRUM spect  
 PROBHD 5 mm PABBO BB/  
 PULPROG zg30  
 TD 65536  
 SOLVENT CDCl3  
 NS 8  
 DS 0  
 SWH 9615.385 Hz  
 FIDRES 0.146719 Hz  
 AQ 3.4078720 sec  
 RG 80.54  
 DW 52.000 usec  
 DE 6.50 usec  
 TE 300.0 K  
 D1 1.00000000 sec  
 TD0 1

==== CHANNEL f1 ====  
 SFO1 400.1629712 MHz  
 NUC1 1H  
 P1 13.20 usec  
 PLW1 13.00000000 W

F2 - Processing parameters  
 SI 65536  
 SF 400.1605092 MHz  
 WDW EM  
 SSB 0  
 LB 0.30 Hz  
 GB 0  
 PC 1.00

Figure S96:  $^1\text{H}$  NMR spectrum of 4f

NRJP-421

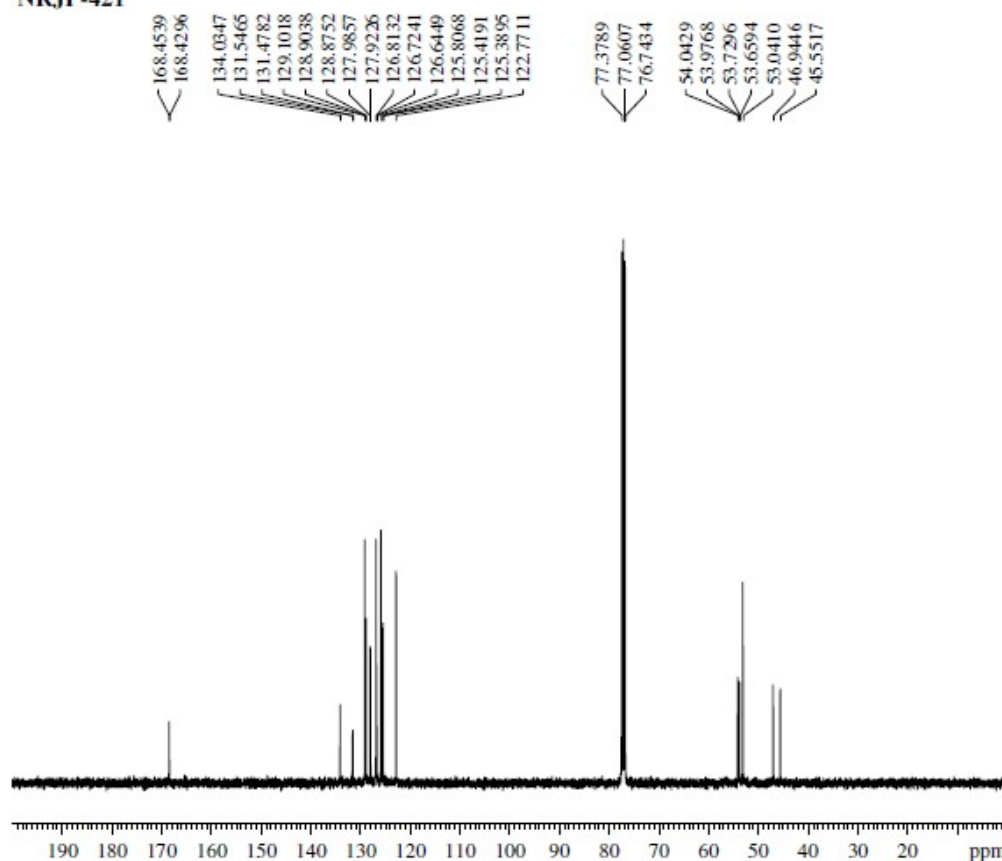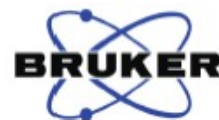

Current Data Parameters  
 NAME 19-May-AN-2023  
 EXPNO 390  
 PROCNO 1

F2 - Acquisition Parameters  
 Date\_ 20230520  
 Time 13.18  
 INSTRUM spect  
 PROBHD 5 mm PABBO BB  
 PULPROG zgpg30  
 TD 65536  
 SOLVENT CDCl3  
 NS 2048  
 DS 0  
 SWH 24038.461 Hz  
 FIDRES 0.366798 Hz  
 AQ 1.3631488 sec  
 RG 201.48  
 DW 20.800 usec  
 DE 6.50 usec  
 TE 300.0 K  
 D1 1.00000000 sec  
 D11 0.03000000 sec  
 TDO 1

==== CHANNEL f1 ====  
 SFO1 100.6304993 MHz  
 NUC1 13C  
 P1 9.90 usec  
 PLW1 53.00000000 W

==== CHANNEL f2 ====  
 SFO2 400.1621006 MHz  
 NUC2 1H  
 CPDPRG[2] waltz16  
 PCPD2 90.00 usec  
 PLW2 13.00000000 W  
 PLW12 0.27963999 W  
 PLW13 0.22651000 W

F2 - Processing parameters  
 SI 32768  
 SF 100.6204380 MHz  
 WDW EM  
 SSB 0  
 LB 1.00 Hz  
 GB 0  
 PC 1.40

Figure S97:  $^{13}\text{C}\{\text{H}\}$  NMR spectrum of 4f

NRJP 421

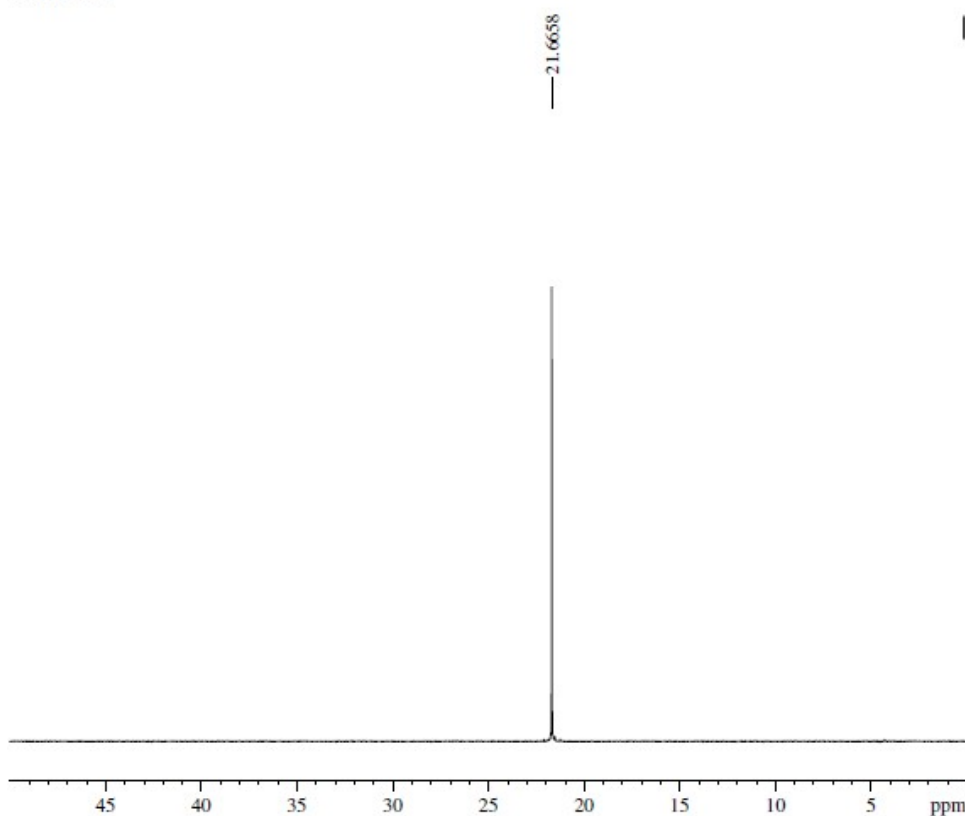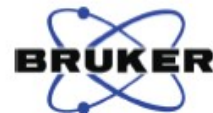

Current Data Parameters  
 NAME 23-May-FN-2023  
 EXPNO 570  
 PROCNO 1

F2 - Acquisition Parameters  
 Date\_ 20230523  
 Time 13.31  
 INSTRUM spect  
 PROBHD 5 mm PABBO BB  
 PULPROG zgpg30  
 TD 65536  
 SOLVENT CDCl3  
 NS 16  
 DS 4  
 SWH 64102.563 Hz  
 FIDRES 0.978127 Hz  
 AQ 0.5111808 sec  
 RG 201.48  
 DW 7.800 usec  
 DE 6.50 usec  
 TE 300.1 K  
 D1 2.00000000 sec  
 D11 0.03000000 sec  
 TDO 1

==== CHANNEL f1 ====  
 SFO1 161.9798402 MHz  
 NUC1 31P  
 P1 15.00 usec  
 PLW1 12.00000000 W

==== CHANNEL f2 ====  
 SFO2 400.1621006 MHz  
 NUC2 1H  
 CPDPRG[2] waltz16  
 PCPD2 90.00 usec  
 PLW2 13.00000000 W  
 PLW12 0.27963999 W  
 PLW13 0.22651000 W

F2 - Processing parameters  
 SI 32768  
 SF 161.9879400 MHz  
 WDW EM  
 SSB 0  
 LB 1.00 Hz  
 GB 0  
 PC 1.40

Figure S98:  $^{31}\text{P}\{\text{H}\}$  NMR spectrum of 4f

NRJP-498

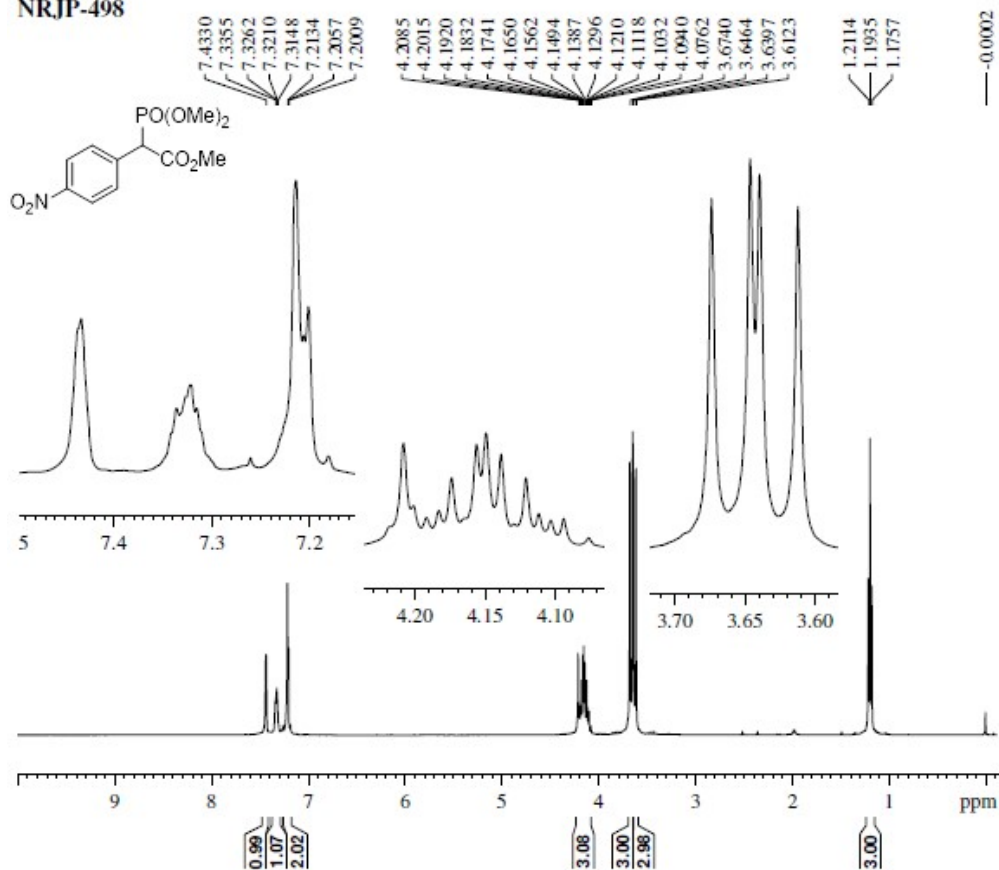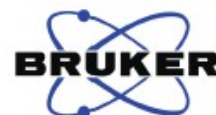

Current Data Parameters  
 NAME 25-OCT-AN-2023  
 EXPNO 420  
 PROCNO 1

F2 - Acquisition Parameters  
 Date\_ 20231025  
 Time 23.09  
 INSTRUM spect  
 PROBHD 5 mm PABBO BB/  
 PULPROG zg30  
 TD 65536  
 SOLVENT CDCl3  
 NS 8  
 DS 0  
 SWH 9615.385 Hz  
 FIDRES 0.146719 Hz  
 AQ 3.4078720 sec  
 RG 19.45  
 DW 52.000 usec  
 DE 6.50 usec  
 TE 300.0 K  
 D1 1.00000000 sec  
 TDO 1

==== CHANNEL f1 ====  
 SFO1 400.1629712 MHz  
 NUC1 1H  
 P1 13.20 usec  
 PLW1 13.0000000 W

F2 - Processing parameters  
 SI 65536  
 SF 400.1605090 MHz  
 WDW EM  
 SSB 0  
 LB 0.30 Hz  
 GB 0  
 PC 1.00

Figure S99: <sup>1</sup>H NMR spectrum of 4g

NRJP-498

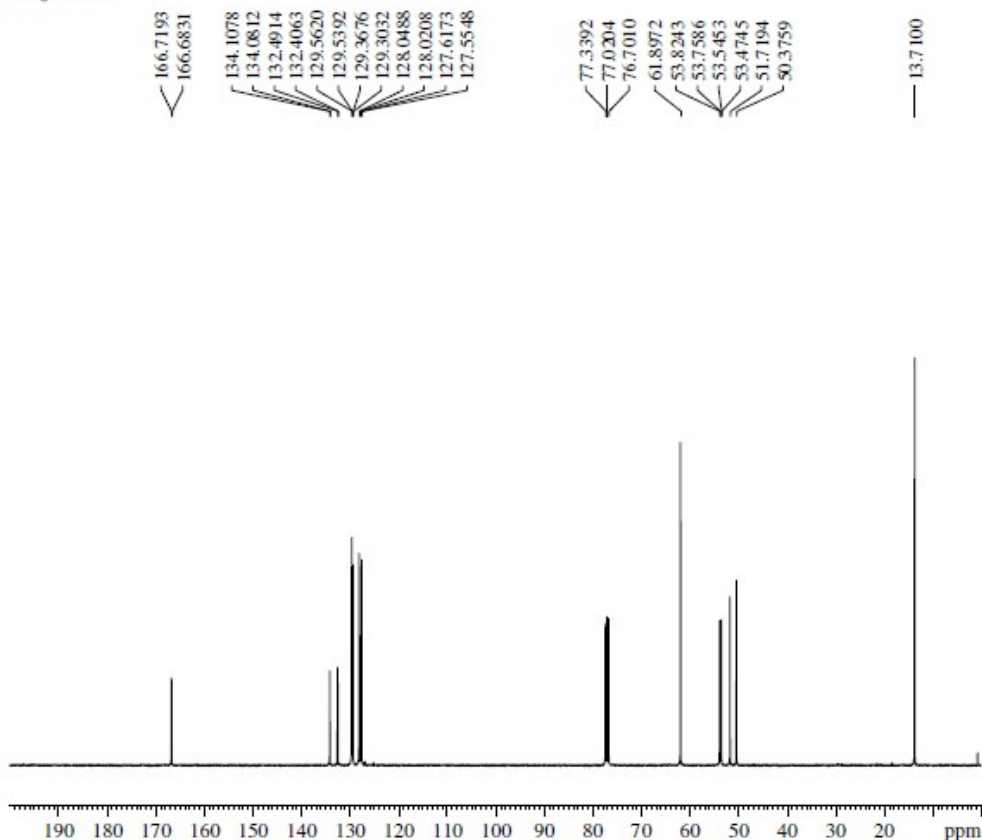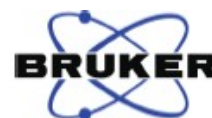

Current Data Parameters  
 NAME 27-OCT-AN-2023  
 EXPNO 340  
 PROCNO 1

F2 - Acquisition Parameters  
 Date\_ 20231028  
 Time 1.11  
 INSTRUM spect  
 PROBHD 5 mm PABBO BB/  
 PULPROG zgpg30  
 TD 65536  
 SOLVENT CDCl3  
 NS 2048  
 DS 4  
 SWH 24038.461 Hz  
 FIDRES 0.366798 Hz  
 AQ 1.3631488 sec  
 RG 201.48  
 DW 20.800 usec  
 DE 6.50 usec  
 TE 300.0 K  
 D1 1.00000000 sec  
 D11 0.03000000 sec  
 TDO 1

==== CHANNEL f1 ====  
 SFO1 100.6304993 MHz  
 NUC1 13C  
 P1 9.90 usec  
 PLW1 53.0000000 W

==== CHANNEL f2 ====  
 SFO2 400.1621006 MHz  
 NUC2 1H  
 CPDPRG2 waltz16  
 PCPD2 90.00 usec  
 PLW2 13.0000000 W  
 PLW12 0.27963999 W  
 PLW13 0.22651000 W

F2 - Processing parameters  
 SI 32768  
 SF 100.6204579 MHz  
 WDW EM  
 SSB 0  
 LB 1.00 Hz  
 GB 0  
 PC 1.40

Figure S100: <sup>13</sup>C{<sup>1</sup>H} NMR spectrum of 4g



NRJP-498

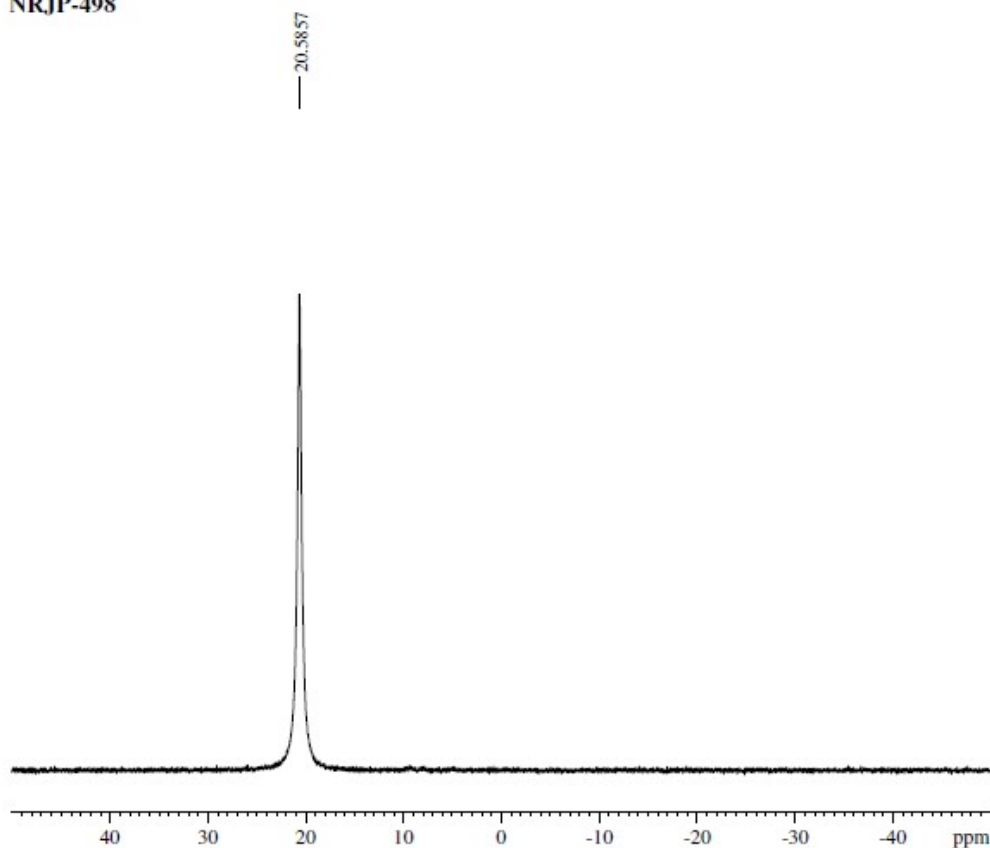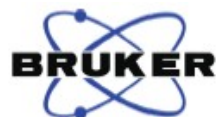

Current Data Parameters  
 NAME 26-OCT-AN-2023  
 EXPNO 370  
 PROCNO 1

F2 - Acquisition Parameters  
 Date\_ 20231026  
 Time 16.59  
 INSTRUM spect  
 PROBHD 5 mm PABBO BB  
 PULPROG zgpg30  
 TD 65536  
 SOLVENT CDCl3  
 NS 16  
 DS 4  
 SWH 64102.563 Hz  
 FIDRES 0.978127 Hz  
 AQ 0.5111808 sec  
 RG 201.48  
 DW 7.800 usec  
 DE 6.50 usec  
 TE 300.1 K  
 D1 2.0000000 sec  
 D11 0.0300000 sec  
 TD0 1

==== CHANNEL f1 ====  
 SFO1 161.9798402 MHz  
 NUC1 31P  
 P1 15.00 usec  
 PLW1 12.0000000 W

==== CHANNEL f2 ====  
 SFO2 400.1621006 MHz  
 NUC2 1H  
 CPDPRG2 waltz16  
 PCPD2 90.00 usec  
 PLW2 13.0000000 W  
 PLW12 0.27963999 W  
 PLW13 0.22651000 W

F2 - Processing parameters  
 SI 32768  
 SF 161.9879400 MHz  
 WDW EM  
 SSB 0  
 LB 1.00 Hz  
 GB 0  
 PC 1.40

Figure S101: <sup>31</sup>P{H} NMR spectrum of 4g

NRJP-489

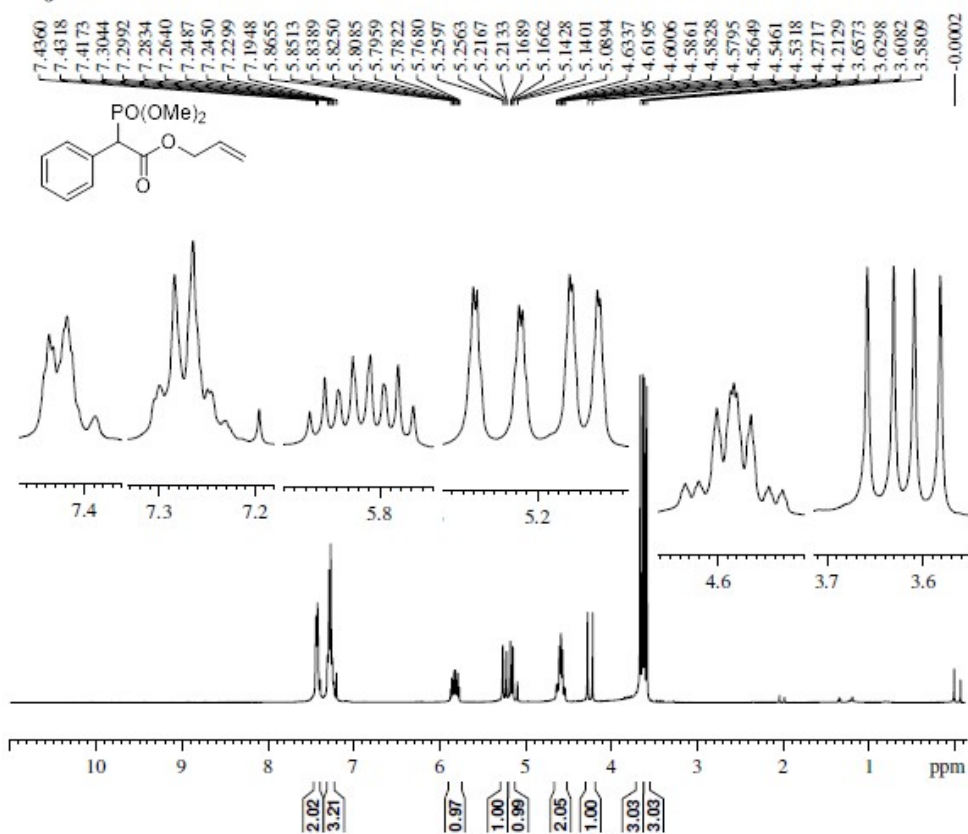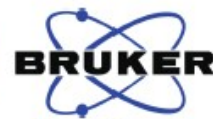

Current Data Parameters  
 NAME 25-OCT-AN-2023  
 EXPNO 410  
 PROCNO 1

F2 - Acquisition Parameters  
 Date\_ 20231025  
 Time 23.05  
 INSTRUM spect  
 PROBHD 5 mm PABBO BB/  
 PULPROG zg30  
 TD 65536  
 SOLVENT CDCl3  
 NS 8  
 DS 0  
 SWH 9615.385 Hz  
 FIDRES 0.146719 Hz  
 AQ 3.4078720 sec  
 RG 80.54  
 DW 52.000 usec  
 DE 6.50 usec  
 TE 300.0 K  
 D1 1.0000000 sec  
 TD0 1

==== CHANNEL f1 ====  
 SFO1 400.1629712 MHz  
 NUC1 1H  
 P1 13.20 usec  
 PLW1 13.0000000 W

F2 - Processing parameters  
 SI 65536  
 SF 400.1605356 MHz  
 WDW EM  
 SSB 0  
 LB 0.30 Hz  
 GB 0  
 PC 1.00

Figure S102: <sup>1</sup>H NMR spectrum of 4h

NRJP-489

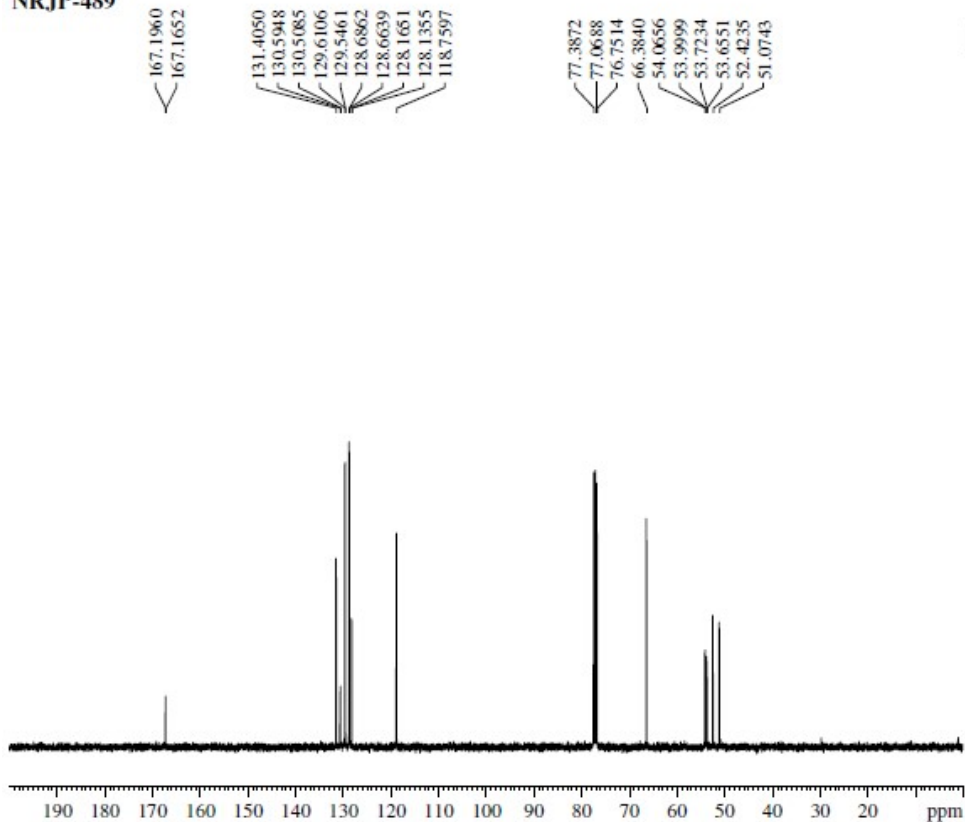

Figure S103:  $^{13}\text{C}\{\text{H}\}$  NMR spectrum of 4h

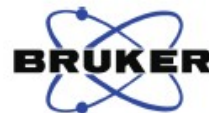

Current Data Parameters  
 NAME 21-DEC-AN-2023  
 EXPNO 380  
 PROCNO 1

F2 - Acquisition Parameters  
 Date\_ 20231222  
 Time 8.56  
 INSTRUM spect  
 PROBHD 5 mm PABBO BB/  
 PULPROG zgpg30  
 TD 65536  
 SOLVENT CDCl3  
 NS 2048  
 DS 4  
 SWH 24038.461 Hz  
 FIDRES 0.366798 Hz  
 AQ 1.3631488 sec  
 RG 201.48  
 DW 20.800 usec  
 DE 6.50 usec  
 TE 300.0 K  
 D1 1.0000000 sec  
 D11 0.0300000 sec  
 TDO 1

==== CHANNEL f1 ====  
 SFO1 100.6304993 MHz  
 NUC1 13C  
 P1 9.90 usec  
 PLW1 53.0000000 W

==== CHANNEL f2 ====  
 SFO2 400.1621006 MHz  
 NUC2 1H  
 CPDPRG2 waltz16  
 PCPD2 90.00 usec  
 PLW2 13.0000000 W  
 PLW12 0.27963999 W  
 PLW13 0.22651000 W

F2 - Processing parameters  
 SI 32768  
 SF 100.6204380 MHz  
 WDW EM  
 SSB 0  
 LB 1.00 Hz  
 GB 0  
 PC 1.40

NRJP-489

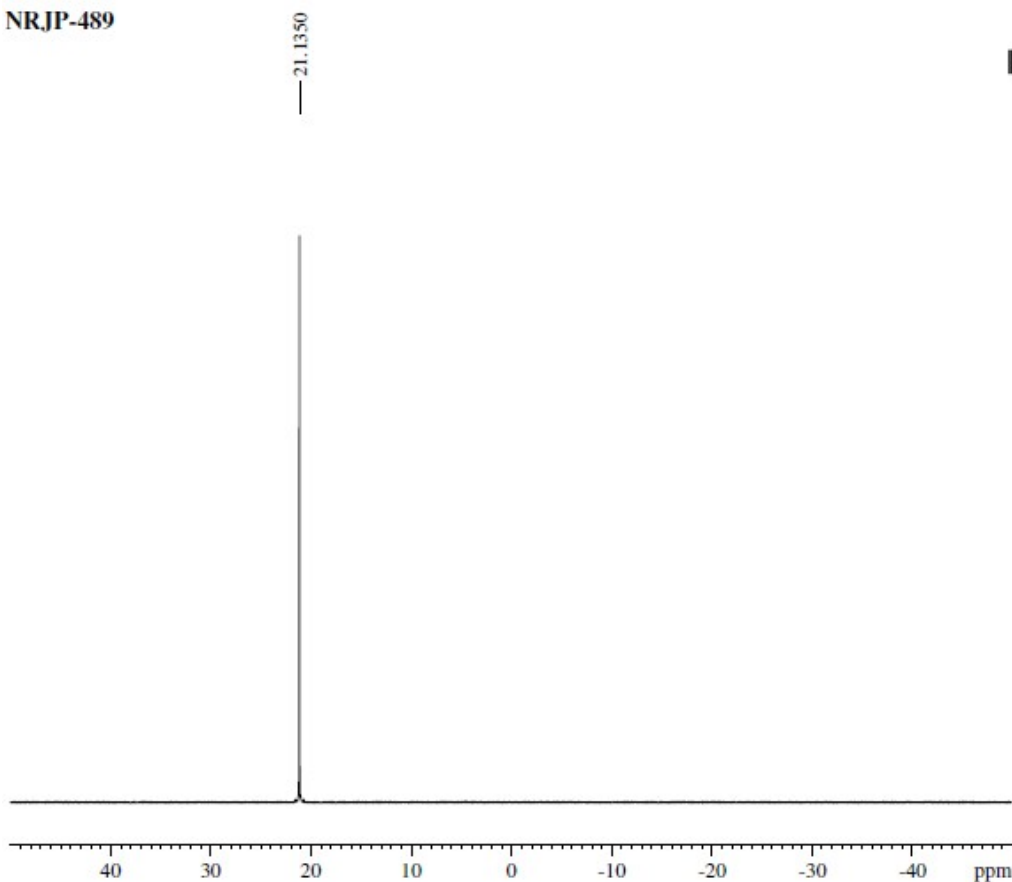

Figure S104:  $^{31}\text{P}\{\text{H}\}$  NMR spectrum of 4h

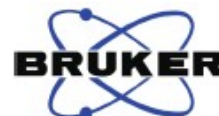

Current Data Parameters  
 NAME 26-OCT-AN-2023  
 EXPNO 350  
 PROCNO 1

F2 - Acquisition Parameters  
 Date\_ 20231026  
 Time 16.49  
 INSTRUM spect  
 PROBHD 5 mm PABBO BB/  
 PULPROG zgpg30  
 TD 65536  
 SOLVENT CDCl3  
 NS 16  
 DS 4  
 SWH 64102.563 Hz  
 FIDRES 0.978127 Hz  
 AQ 0.5111808 sec  
 RG 201.48  
 DW 7.800 usec  
 DE 6.50 usec  
 TE 300.1 K  
 D1 2.0000000 sec  
 D11 0.0300000 sec  
 TDO 1

==== CHANNEL f1 ====  
 SFO1 161.9798402 MHz  
 NUC1 31P  
 P1 15.00 usec  
 PLW1 12.0000000 W

==== CHANNEL f2 ====  
 SFO2 400.1621006 MHz  
 NUC2 1H  
 CPDPRG2 waltz16  
 PCPD2 90.00 usec  
 PLW2 13.0000000 W  
 PLW12 0.27963999 W  
 PLW13 0.22651000 W

F2 - Processing parameters  
 SI 32768  
 SF 161.9879400 MHz  
 WDW EM  
 SSB 0  
 LB 1.00 Hz  
 GB 0  
 PC 1.40

NRJP 485

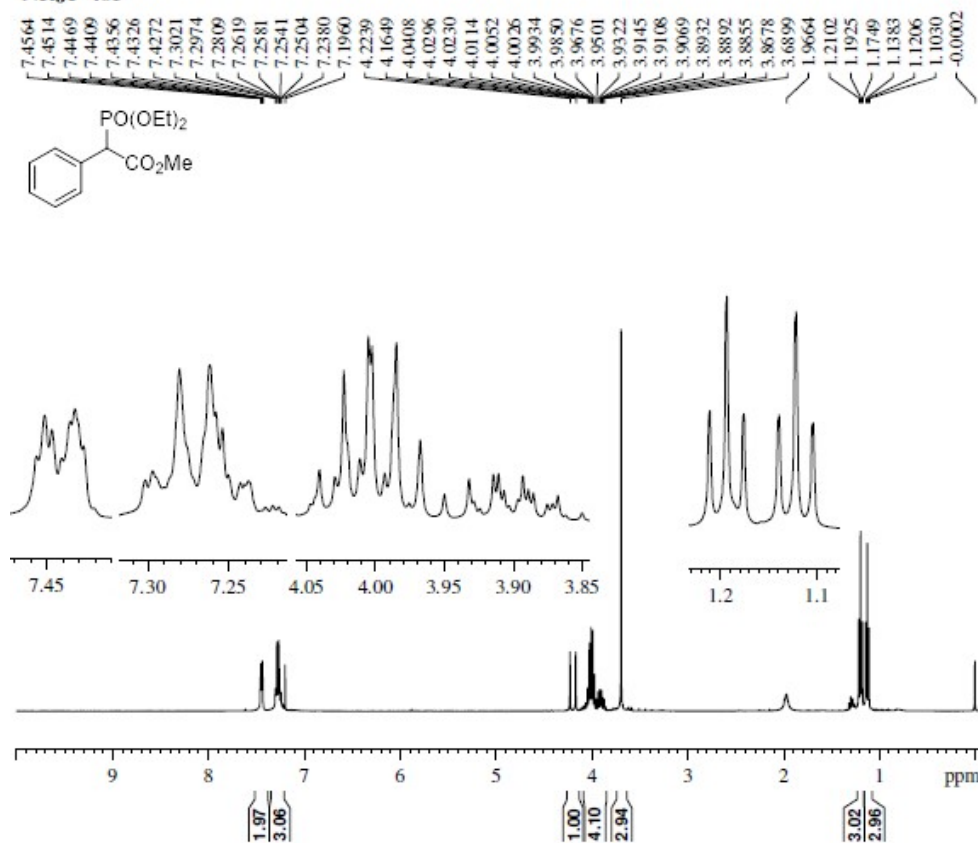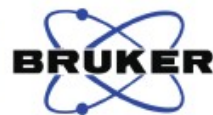

Current Data Parameters  
 NAME 25-OCT-FN-2023  
 EXPNO 540  
 PROCNO 1

F2 - Acquisition Parameters  
 Date\_ 20231025  
 Time 13.44  
 INSTRUM spect  
 PROBHD 5 mm PABBO BB  
 PULPROG zg30  
 TD 65536  
 SOLVENT CDCl3  
 NS 8  
 DS 0  
 SWH 9615.385 Hz  
 FIDRES 0.146719 Hz  
 AQ 3.4078720 sec  
 RG 100.41  
 DW 52.000 usec  
 DE 6.50 usec  
 TE 300.0 K  
 D1 1.00000000 sec  
 TD0 1

==== CHANNEL f1 ====  
 SFO1 400.1629712 MHz  
 NUC1 1H  
 P1 13.20 usec  
 PLW1 13.00000000 W

F2 - Processing parameters  
 SI 65536  
 SF 400.1605352 MHz  
 WDW EM  
 SSB 0  
 LB 0.30 Hz  
 GB 0  
 PC 1.00

Figure S105: <sup>1</sup>H NMR spectrum of 4i

NRJP-485

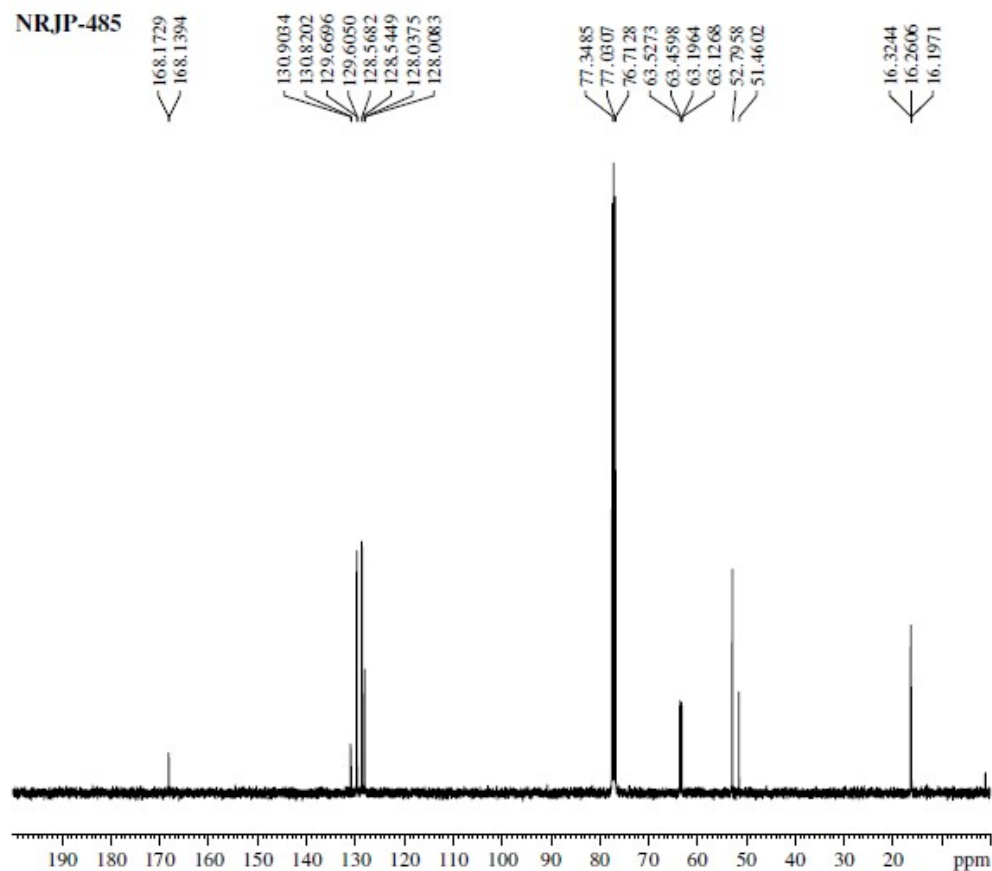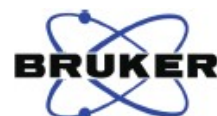

Current Data Parameters  
 NAME 26-OCT-AN-2023  
 EXPNO 330  
 PROCNO 1

F2 - Acquisition Parameters  
 Date\_ 20231026  
 Time 16.37  
 INSTRUM spect  
 PROBHD 5 mm PABBO BB/  
 PULPROG zgpg30  
 TD 65536  
 SOLVENT CDCl3  
 NS 2048  
 DS 4  
 SWH 24038.461 Hz  
 FIDRES 0.366798 Hz  
 AQ 1.3631488 sec  
 RG 201.48  
 DW 20.800 usec  
 DE 6.50 usec  
 TE 300.0 K  
 D1 1.00000000 sec  
 D11 0.03000000 sec  
 TD0 1

==== CHANNEL f1 ====  
 SFO1 100.6304993 MHz  
 NUC1 13C  
 P1 9.90 usec  
 PLW1 53.00000000 W

==== CHANNEL f2 ====  
 SFO2 400.1621006 MHz  
 NUC2 1H  
 CPDPRG[2] waltz16  
 PCPD2 90.00 usec  
 PLW2 13.00000000 W  
 PLW12 0.27963999 W  
 PLW13 0.22651000 W

F2 - Processing parameters  
 SI 32768  
 SF 100.6204380 MHz  
 WDW EM  
 SSB 0  
 LB 1.00 Hz  
 GB 0  
 PC 1.40

Figure S106: <sup>13</sup>C{H} NMR spectrum of 4i

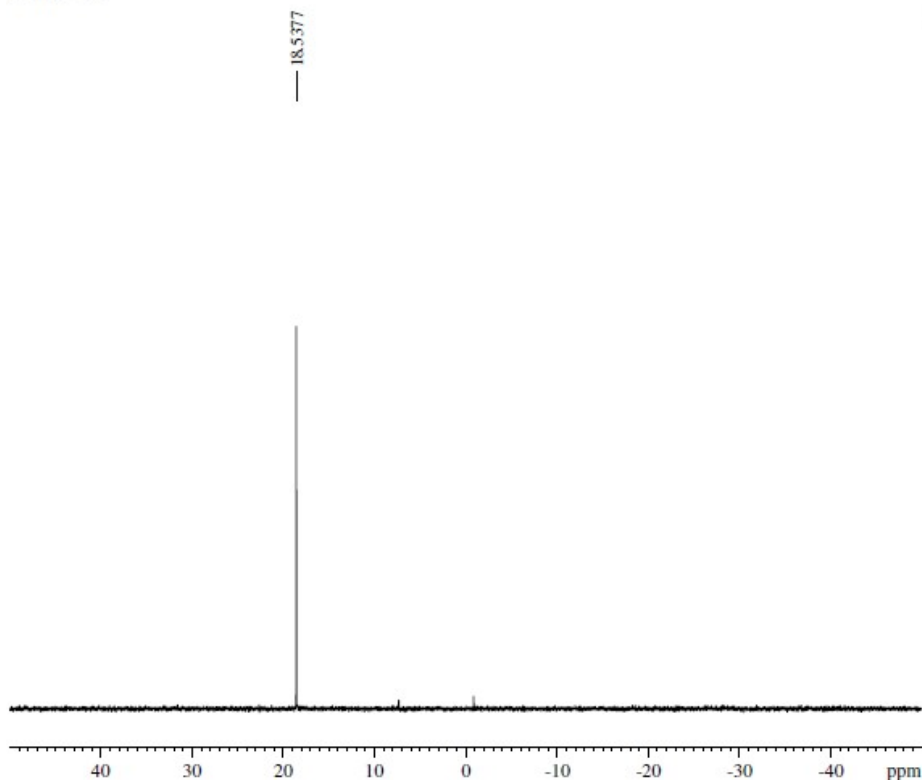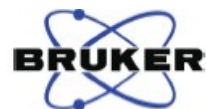

Current Data Parameters  
 NAME 13-OCT-AN-2023  
 EXPNO 330  
 PROCNO 1

F2 - Acquisition Parameters  
 Date\_ 20231016  
 Time 9:39  
 INSTRUM spect  
 PROBHD 5 mm F4BBO BIV  
 PULPROG zgpg30  
 TD 65536  
 SOLVENT CDCl3  
 NS 16  
 DS 4  
 SWH 64102.563 Hz  
 FIDRES 0.978127 Hz  
 AQ 0.5111808 sec  
 RG 201.48  
 DW 7.800 usec  
 DE 6.50 usec  
 TE 300.3 K  
 D1 2.00000000 sec  
 D11 0.03000000 sec  
 TDO 1

==== CHANNEL f1 ====  
 SFO1 161.9798402 MHz  
 NUC1 31P  
 P1 15.00 usec  
 PLW1 12.00000000 W

==== CHANNEL f2 ====  
 SFO2 400.1621006 MHz  
 NUC2 1H  
 CPDPRG2 waltz16  
 PCPD2 90.00 usec  
 PLW2 13.00000000 W  
 PLW12 0.27963999 W  
 PLW13 0.22651000 W

F2 - Processing parameters  
 SI 32768  
 SF 161.9879400 MHz  
 WDW EM  
 SSB 0  
 LB 1.00 Hz  
 GB 0  
 PC 1.40

Figure S107:  $^{31}\text{P}\{\text{H}\}$  NMR spectrum of 4i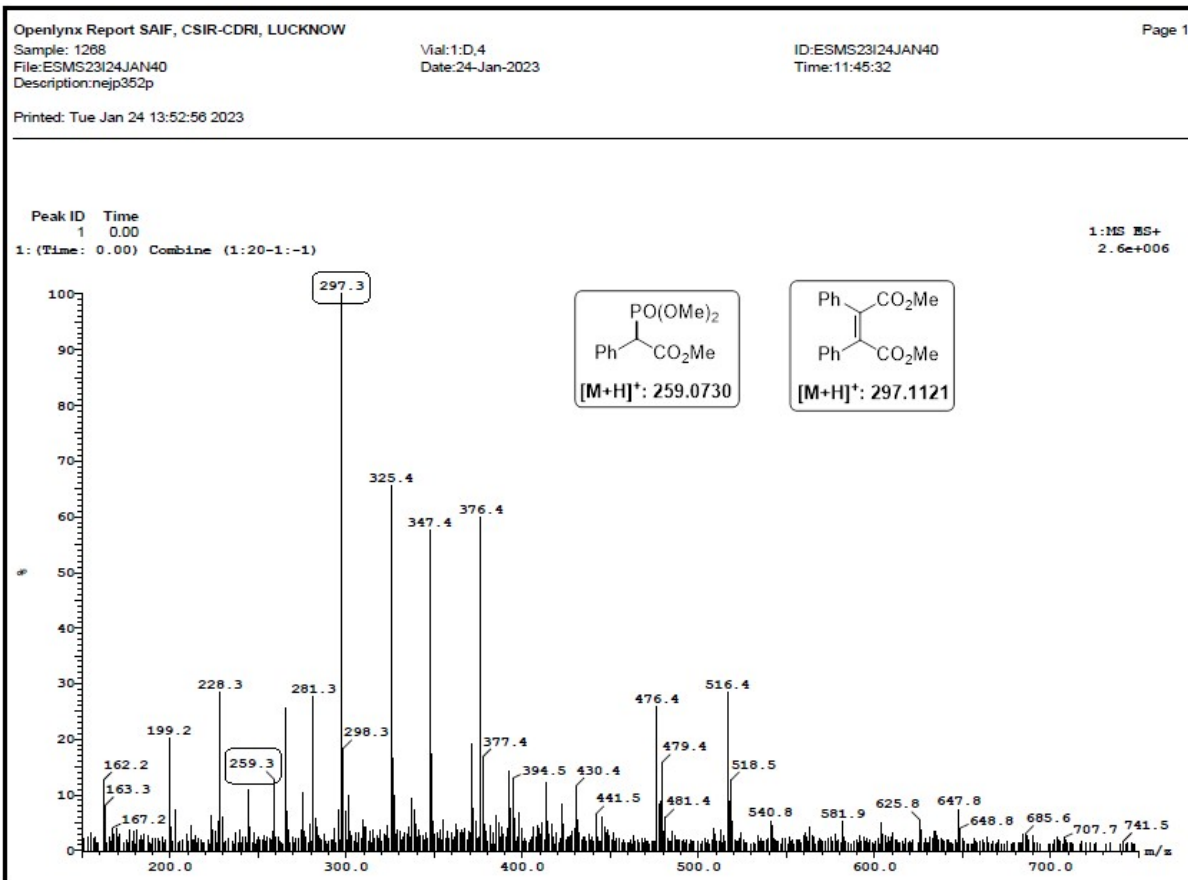

Figure S108: ESMS of crude 4a
